# Supplementary material for: Pan-Cancer Immunogenomic Perspective on the Tumor Microenvironment Based on PD-L1 and CD8 T-Cell Infiltration
Source: Oxford University Press journal article supplement (doi:10.1158/1078-0432.ccr-15-2834), 2016-01-27
Supplement: 10780432ccr152834-sup-158558_1_supp_0_22pmj2.xlsx [file 10780432ccr152834-sup-158558_1_supp_0_22pmj2.xlsx]

## Sheet: supplementary_table_1
Supplementary Table 1. Clinical information and genomic data of TCGA samples
TCGA ID	Log 2 (PD-L1) RPKM	Log 2 (CD8A) RPKM	Cancer type	Tumor microenvironment immune type	Overall survival (days)	Survival event (1=death)	Microsatellite instability	Number of somatic mutation	Number of predicted neoantigen	Virus detection*	PD-L1 Amplified amplification
TCGA-02-0047-01	4.0858	4.4527	GBM	II	448	1	NA	42	14	None	Not amplified
TCGA-02-0055-01	9.0836	6.7026	GBM	III	76	1	NA	35	14	None	Not amplified
TCGA-02-2483-01	1.9837	4.8511	GBM	II	466	0	NA	24	10	None	Not amplified
TCGA-02-2485-01	4.6328	6.0804	GBM	II	470	0	NA	38	13	None	Not amplified
TCGA-02-2486-01	6.7912	7.8163	GBM	I	493	0	NA	39	3	None	Not amplified
TCGA-04-1348-01	4.9843	8.9775	OV	I	1483	1	NA	NA	11	None	Not amplified
TCGA-04-1357-01	6.2455	10.5492	OV	I	NA	NA	NA	NA	17	None	Not amplified
TCGA-04-1362-01	2.4067	5.3937	OV	II	1348	1	NA	NA	16	None	Not amplified
TCGA-04-1364-01	1.6416	2.8798	OV	II	1024	1	NA	35	NA	None	Not amplified
TCGA-04-1365-01	4.0328	8.2415	OV	IV	2329	0	NA	35	NA	None	Not amplified
TCGA-04-1514-01	4.7187	6.0138	OV	II	1720	1	NA	24	NA	None	Not amplified
TCGA-04-1519-01	1.8759	4.1982	OV	II	24	0	NA	2	NA	None	Not amplified
TCGA-05-4244-01	8.034	7.15	LUAD	I	NA	NA	NA	NA	37	None	Not amplified
TCGA-05-4249-01	6.1004	6.9276	LUAD	III	1523	0	NA	297	49	None	Not amplified
TCGA-05-4250-01	8.6625	9.9113	LUAD	I	121	1	NA	NA	52	None	Not amplified
TCGA-05-4382-01	6.8858	7.411	LUAD	I	607	0	NA	1282	228	None	Not amplified
TCGA-05-4384-01	5.0608	6.856	LUAD	III	426	0	NA	119	31	None	Not amplified
TCGA-05-4389-01	6.71	10.2236	LUAD	I	1369	0	NA	220	52	None	Not amplified
TCGA-05-4390-01	5.8054	6.3023	LUAD	III	1126	0	NA	498	68	None	Not amplified
TCGA-05-4395-01	5.9211	7.649	LUAD	I	0	1	NA	218	38	None	Not amplified
TCGA-05-4396-01	4.6149	6.1447	LUAD	II	303	1	NA	467	NA	None	Not amplified
TCGA-05-4397-01	5.1835	6.9364	LUAD	III	731	1	NA	NA	139	None	Not amplified
TCGA-05-4398-01	9.35	8.3339	LUAD	I	1431	0	NA	667	114	None	Not amplified
TCGA-05-4402-01	5.5497	6.9463	LUAD	III	244	1	NA	143	36	None	Not amplified
TCGA-05-4403-01	5.5928	7.1322	LUAD	I	578	0	NA	122	28	None	Not amplified
TCGA-05-4405-01	6.3312	7.9969	LUAD	I	610	0	NA	359	68	None	Not amplified
TCGA-05-4410-01	6.7553	9.3879	LUAD	I	NA	NA	NA	968	90	None	Not amplified
TCGA-05-4415-01	6.0025	8.7567	LUAD	I	91	1	NA	172	27	None	Not amplified
TCGA-05-4417-01	6.3295	8.8367	LUAD	I	455	0	NA	249	85	None	Not amplified
TCGA-05-4418-01	7.0293	8.9393	LUAD	I	274	1	NA	239	43	None	Not amplified
TCGA-05-4420-01	4.3912	6.6382	LUAD	II	912	0	NA	254	36	None	Not amplified
TCGA-05-4422-01	5.7942	10.1199	LUAD	I	365	0	NA	48	10	None	Not amplified
TCGA-05-4424-01	5.4403	8.3257	LUAD	I	913	0	NA	678	123	None	Not amplified
TCGA-05-4425-01	7.1154	7.6333	LUAD	I	669	0	NA	33	6	None	Not amplified
TCGA-05-4426-01	8.1975	6.7589	LUAD	III	791	0	NA	49	20	None	Not amplified
TCGA-05-4427-01	8.1979	8.2053	LUAD	I	791	0	NA	NA	175	None	Not amplified
TCGA-05-4430-01	6.1662	8.2556	LUAD	I	761	0	NA	269	35	None	Not amplified
TCGA-05-4432-01	5.9031	8.5163	LUAD	I	761	0	NA	585	103	None	Not amplified
TCGA-05-4433-01	5.8379	8.7479	LUAD	I	730	0	NA	38	11	None	Not amplified
TCGA-05-4434-01	8.0329	8.4747	LUAD	I	457	1	NA	NA	8	None	Not amplified
TCGA-05-5420-01	7.7476	9.741	LUAD	I	457	0	NA	93	15	None	Not amplified
TCGA-05-5423-01	5.6463	7.9407	LUAD	I	151	0	NA	138	27	None	Not amplified
TCGA-05-5425-01	6.7611	9.807	LUAD	I	882	0	NA	NA	54	None	Not amplified
TCGA-05-5428-01	5.9952	7.5246	LUAD	I	670	0	NA	319	53	None	Not amplified
TCGA-05-5429-01	2.9929	6.5155	LUAD	II	275	1	NA	36	5	None	Not amplified
TCGA-05-5715-01	4.4648	6.9494	LUAD	II	62	0	NA	107	24	None	Not amplified
TCGA-06-0125-01	4.5983	4.3326	GBM	II	1448	1	NA	47	9	None	Not amplified
TCGA-06-0125-02	5.9868	5.5636	GBM	III	1448	1	NA	NA	NA	None	NA
TCGA-06-0129-01	5.5337	4.2264	GBM	III	1024	1	NA	26	11	None	Not amplified
TCGA-06-0130-01	7.3159	9.248	GBM	I	394	1	NA	18	6	None	Not amplified
TCGA-06-0132-01	4.2999	6.4669	GBM	II	771	1	NA	17	1	None	Not amplified
TCGA-06-0138-01	3.9554	5.5848	GBM	II	737	1	NA	NA	NA	None	Not amplified
TCGA-06-0141-01	5.529	6.6523	GBM	III	313	1	NA	7	6	None	Not amplified
TCGA-06-0152-02	8.3378	6.8592	GBM	III	375	1	NA	NA	NA	None	NA
TCGA-06-0156-01	4.41135	6.95375	GBM	II	178	1	NA	NA	NA	None	NA
TCGA-06-0157-01	3.4791	5.8225	GBM	II	97	1	NA	37	6	None	Not amplified
TCGA-06-0158-01	5.3289	5.1966	GBM	III	329	1	NA	37	8	None	Not amplified
TCGA-06-0168-01	5.2364	5.2364	GBM	III	598	1	NA	27	6	None	Not amplified
TCGA-06-0171-02	6.0853	7.8053	GBM	I	399	1	NA	NA	NA	None	NA
TCGA-06-0174-01	3.6552	5.1819	GBM	II	98	1	NA	50	14	None	Not amplified
TCGA-06-0178-01	2.6739	5.5348	GBM	II	1642	0	NA	2	0	None	Not amplified
TCGA-06-0184-01	5.3991	5.3822	GBM	III	1228	0	NA	38	9	None	Not amplified
TCGA-06-0187-01	5.403	4.534	GBM	III	828	1	NA	32	NA	None	Not amplified
TCGA-06-0190-01	5.7822	6.2889	GBM	III	317	1	NA	45	15	None	Not amplified
TCGA-06-0190-02	5.3348	7.2192	GBM	I	317	1	NA	NA	NA	None	NA
TCGA-06-0210-01	6.0728	5.1443	GBM	III	225	1	NA	38	10	None	Not amplified
TCGA-06-0210-02	5.0678	6.9918	GBM	III	225	1	NA	NA	NA	None	NA
TCGA-06-0211-01	5.06685	3.5679	GBM	III	360	1	NA	42	10	None	Not amplified
TCGA-06-0211-02	4.6446	6.0231	GBM	II	360	1	NA	NA	NA	None	NA
TCGA-06-0219-01	4.1136	5.6791	GBM	II	22	1	NA	30	4	None	Not amplified
TCGA-06-0221-02	4.4629	4.6182	GBM	II	603	1	NA	NA	NA	None	NA
TCGA-06-0238-01	3.3543	5.9438	GBM	II	405	1	NA	27	10	None	Not amplified
TCGA-06-0644-01	7.3936	6.3123	GBM	III	375	0	NA	40	9	None	Not amplified
TCGA-06-0645-01	6.0289	5.2719	GBM	III	175	1	NA	42	11	None	Not amplified
TCGA-06-0646-01	5.4806	4.3623	GBM	III	175	1	NA	29	7	None	Not amplified
TCGA-06-0649-01	3.8682	7.2349	GBM	IV	64	1	NA	144	23	None	Not amplified
TCGA-06-0686-01	1.0772	4.1414	GBM	II	286	0	NA	35	14	None	Not amplified
TCGA-06-0743-01	3.5359	6.6529	GBM	II	679	0	NA	71	12	None	Not amplified
TCGA-06-0744-01	2.4116	5.4123	GBM	II	595	0	NA	47	16	None	Not amplified
TCGA-06-0745-01	1.9891	6.2172	GBM	II	239	1	NA	37	9	None	Not amplified
TCGA-06-0747-01	3.8237	3.4572	GBM	II	82	1	NA	55	14	None	Not amplified
TCGA-06-0749-01	3.3365	4.9872	GBM	II	82	1	NA	35	8	None	Not amplified
TCGA-06-0750-01	4.929	5.7382	GBM	III	28	1	NA	25	5	None	Not amplified
TCGA-06-0878-01	5.169	5.5083	GBM	III	218	0	NA	30	10	None	Not amplified
TCGA-06-0882-01	4.1615	5.3702	GBM	II	165	0	NA	22	6	None	Not amplified
TCGA-06-1804-01	4.4719	3.8439	GBM	II	414	1	NA	58	10	None	Not amplified
TCGA-06-2557-01	4.87	7.096	GBM	I	33	1	NA	28	13	None	Not amplified
TCGA-06-2558-01	4.143	5.3361	GBM	II	380	1	NA	56	11	None	Not amplified
TCGA-06-2559-01	6.6156	4.998	GBM	III	150	1	NA	32	11	None	Not amplified
TCGA-06-2561-01	5.0246	6.9909	GBM	III	282	0	NA	30	2	None	Not amplified
TCGA-06-2562-01	8.652	4.1713	GBM	III	86	0	NA	43	10	None	Not amplified
TCGA-06-2563-01	6.3524	5.9734	GBM	III	259	0	NA	54	15	None	Not amplified
TCGA-06-2564-01	6.3613	4.878	GBM	III	181	0	NA	47	11	None	Not amplified
TCGA-06-2565-01	4.3616	5.2636	GBM	II	207	0	NA	31	11	None	Not amplified
TCGA-06-2567-01	5.6404	5.2947	GBM	III	133	1	NA	38	8	None	Not amplified
TCGA-06-2569-01	3.4478	7.7213	GBM	IV	13	0	NA	25	12	None	Not amplified
TCGA-06-2570-01	4.3865	3.6619	GBM	II	285	0	NA	22	8	None	Not amplified
TCGA-06-5408-01	5.1658	3.5363	GBM	III	357	1	NA	29	7	None	Not amplified
TCGA-06-5410-01	5.3892	5.0315	GBM	III	108	1	NA	6	2	None	Not amplified
TCGA-06-5411-01	5.0742	6.5826	GBM	III	254	1	NA	23	6	None	Not amplified
TCGA-06-5412-01	8.5245	5.7688	GBM	III	138	1	NA	36	13	None	Not amplified
TCGA-06-5413-01	4.3085	6.8255	GBM	II	268	0	NA	37	12	None	Not amplified
TCGA-06-5414-01	6.2979	4.5216	GBM	III	273	0	NA	25	5	None	Not amplified
TCGA-06-5415-01	3.8205	6.4318	GBM	II	260	0	NA	37	10	None	Not amplified
TCGA-06-5416-01	3.8483	5.5367	GBM	II	204	0	NA	2088	NA	None	Not amplified
TCGA-06-5417-01	3.11	3.3981	GBM	II	155	0	NA	33	12	None	NA
TCGA-06-5418-01	5.6619	2.9906	GBM	III	83	1	NA	31	7	None	Not amplified
TCGA-06-5856-01	5.8165	4.5912	GBM	III	114	1	NA	36	13	None	Not amplified
TCGA-06-5858-01	4.5159	2.4745	GBM	II	187	0	NA	114	51	None	Not amplified
TCGA-06-5859-01	4.3961	5.9135	GBM	II	139	0	NA	33	3	None	Not amplified
TCGA-08-0386-01	5.2825	2.2188	GBM	III	548	1	NA	7	2	None	Not amplified
TCGA-09-0364-01	0.9286	3.8631	OV	II	887	1	NA	13	NA	None	Not amplified
TCGA-09-0366-01	4.2105	6.6754	OV	II	1757	1	NA	NA	6	None	Not amplified
TCGA-09-0367-01	1.43	5.8307	OV	II	547	1	NA	NA	NA	None	Not amplified
TCGA-09-0369-01	0.9114	4.3696	OV	II	1082	1	NA	NA	8	None	Not amplified
TCGA-09-1662-01	4.4242	6.586	OV	II	2717	1	NA	25	NA	None	Not amplified
TCGA-09-1666-01	5.9919	7.6374	OV	I	1752	0	NA	14	NA	None	Not amplified
TCGA-09-1667-01	6.2128	8.0345	OV	I	1882	0	NA	NA	NA	None	Not amplified
TCGA-09-1668-01	6.073	7.9221	OV	I	1684	0	NA	NA	NA	None	Not amplified
TCGA-09-1669-01	4.3676	7.9561	OV	IV	928	0	NA	38	NA	None	Not amplified
TCGA-09-1670-01	4.8989	6.2486	OV	III	547	0	NA	NA	NA	None	Not amplified
TCGA-09-1673-01	3.6723	5.3278	OV	II	92	0	NA	NA	NA	None	Not amplified
TCGA-09-1674-01	2.6049	3.5095	OV	II	260	0	NA	NA	NA	None	Not amplified
TCGA-09-2044-01	4.3998	7.5332	OV	IV	186	0	NA	NA	10	None	Not amplified
TCGA-09-2045-01	5.0321	6.1774	OV	III	1069	1	NA	NA	9	None	Not amplified
TCGA-09-2048-01	2.7473	3.5298	OV	II	138	1	NA	NA	NA	None	Not amplified
TCGA-09-2051-01	4.9744	6.5172	OV	III	1919	0	NA	NA	13	None	Not amplified
TCGA-09-2054-01	3.6898	5.7976	OV	II	637	1	NA	NA	NA	None	Not amplified
TCGA-09-2056-01	4.0768	7.5445	OV	IV	379	0	NA	NA	16	None	Not amplified
TCGA-10-0928-01	2.7084	3.3542	OV	II	563	1	NA	35	6	None	Not amplified
TCGA-10-0936-01	3.8178	6.6036	OV	II	1123	1	NA	NA	NA	None	Not amplified
TCGA-12-0616-01	1.8261	7.7641	GBM	IV	448	1	NA	20	11	None	Not amplified
TCGA-12-0618-01	3.3268	6.8492	GBM	II	395	1	NA	27	13	None	Not amplified
TCGA-12-0619-01	6.1635	6.0784	GBM	III	1062	1	NA	41	11	None	Not amplified
TCGA-12-0821-01	2.3945	4.5383	GBM	II	323	1	NA	45	9	None	Not amplified
TCGA-12-1597-01	3.188	3.7192	GBM	II	675	1	NA	16	17	None	NA
TCGA-12-3650-01	4.11	6.008	GBM	II	333	1	NA	39	10	None	Not amplified
TCGA-12-3652-01	4.342	5.3746	GBM	II	1062	1	NA	42	9	None	Not amplified
TCGA-12-3653-01	6.2	4.7214	GBM	III	442	1	NA	25	3	None	Not amplified
TCGA-12-5295-01	4.5168	6.4999	GBM	II	454	1	NA	54	13	None	Not amplified
TCGA-12-5299-01	6.4636	2.5122	GBM	III	98	1	NA	27	13	None	Not amplified
TCGA-13-0730-01	3.32	8.123	OV	IV	542	1	NA	29	NA	None	Not amplified
TCGA-13-0799-01	5.1804	5.5096	OV	III	237	0	NA	NA	NA	None	Amplified
TCGA-13-0800-01	2.5216	6.2192	OV	II	247	0	NA	NA	8	None	Not amplified
TCGA-13-0801-01	4.4538	7.4883	OV	IV	252	0	NA	18	NA	None	Not amplified
TCGA-13-0890-01	4.0409	6.9278	OV	II	2068	0	NA	NA	10	None	Not amplified
TCGA-13-0893-01	4.5885	7.5097	OV	IV	1319	1	NA	NA	13	None	Not amplified
TCGA-13-0897-01	4.3968	6.9291	OV	II	1748	0	NA	NA	8	None	Not amplified
TCGA-13-0899-01	3.085	5.6403	OV	II	1708	0	NA	NA	7	None	Not amplified
TCGA-13-0913-01	3.1703	4.765	OV	II	912	0	NA	NA	11	None	Not amplified
TCGA-13-0916-01	5.1595	7.8391	OV	I	644	0	NA	NA	6	None	Not amplified
TCGA-13-0920-01	3.9309	6.6434	OV	II	420	0	NA	NA	22	None	Not amplified
TCGA-13-0924-01	2.9138	8.295	OV	IV	185	0	NA	NA	8	None	Not amplified
TCGA-13-1403-01	3.7408	4.455	OV	II	331	0	NA	NA	7	None	Not amplified
TCGA-13-1405-01	3.3046	8.0177	OV	IV	224	0	NA	NA	2	None	Not amplified
TCGA-13-1410-01	4.5948	5.7105	OV	II	143	0	NA	NA	12	None	Not amplified
TCGA-13-1481-01	3.3228	6.4726	OV	II	2648	1	NA	NA	22	None	Not amplified
TCGA-13-1489-02	4.2611	7.4321	OV	IV	2521	0	NA	NA	NA	None	NA
TCGA-13-1497-01	4.1617	6.811	OV	II	1652	0	NA	NA	17	None	Not amplified
TCGA-13-1498-01	5.2992	8.0105	OV	I	1144	0	NA	NA	15	None	Amplified
TCGA-13-1505-01	4.4061	7.0213	OV	IV	128	0	NA	NA	12	None	Not amplified
TCGA-13-1506-01	4.086	5.1959	OV	II	134	0	NA	NA	4	None	Not amplified
TCGA-13-1507-01	5.7201	7.7848	OV	I	145	0	NA	NA	16	None	Amplified
TCGA-13-1511-01	5.9312	4.8866	OV	III	119	0	NA	NA	NA	None	Not amplified
TCGA-13-1512-01	3.9125	6.8261	OV	II	94	0	NA	NA	18	None	Not amplified
TCGA-13-2060-01	5.2585	8.1855	OV	I	262	0	NA	NA	11	None	Not amplified
TCGA-14-0736-02	5.1679	7.6397	GBM	I	460	1	NA	NA	NA	None	NA
TCGA-14-0781-01	7.4391	3.7436	GBM	III	29	1	NA	19	4	None	Not amplified
TCGA-14-0787-01	5.884	4.1449	GBM	III	68	1	NA	25	10	None	Not amplified
TCGA-14-0789-01	7.6208	4.6072	GBM	III	342	1	NA	46	12	None	Not amplified
TCGA-14-0790-01	2.3493	4.8909	GBM	II	419	1	NA	45	13	None	Not amplified
TCGA-14-0817-01	4.6975	6.2663	GBM	II	164	1	NA	52	13	None	Not amplified
TCGA-14-0871-01	2.0686	6.4992	GBM	II	880	1	NA	39	NA	None	Not amplified
TCGA-14-1034-01	6.7283	4.9056	GBM	III	485	1	NA	53	9	None	Not amplified
TCGA-14-1034-02	5.6855	3.0538	GBM	III	485	1	NA	NA	NA	None	NA
TCGA-14-1402-02	4.8058	7.2563	GBM	I	975	1	NA	NA	NA	None	NA
TCGA-14-1823-01	4.0003	5.2098	GBM	II	543	1	NA	37	8	None	Not amplified
TCGA-14-1825-01	4.7051	5.1062	GBM	II	232	1	NA	39	5	None	Not amplified
TCGA-14-1829-01	4.7297	5.111	GBM	II	218	0	NA	29	10	None	Not amplified
TCGA-14-2554-01	4.8801	5.4245	GBM	III	532	1	NA	50	4	None	Not amplified
TCGA-15-0742-01	3.7121	3.6529	GBM	II	419	1	NA	56	13	None	Not amplified
TCGA-15-1444-01	5.176	3.8144	GBM	III	1537	1	NA	21	7	None	Not amplified
TCGA-16-0846-01	4.9448	7.0656	GBM	I	119	1	NA	16	11	None	Not amplified
TCGA-16-1045-01	5.2624	5.3085	GBM	III	883	1	NA	54	21	None	Not amplified
TCGA-18-3406-01	5.4436	8.3874	LUSC	I	371	1	NA	230	45	None	Not amplified
TCGA-18-3407-01	9.1548	7.6186	LUSC	I	227	1	NA	129	25	None	Not amplified
TCGA-18-3408-01	8.5633	7.8712	LUSC	I	2304	1	NA	89	13	None	Not amplified
TCGA-18-3409-01	5.6652	6.4955	LUSC	III	2417	0	NA	2481	377	None	Not amplified
TCGA-18-3410-01	10.6454	9.7423	LUSC	I	146	1	NA	238	36	None	Not amplified
TCGA-18-3411-01	5.3935	7.3101	LUSC	I	3576	0	NA	324	59	None	Not amplified
TCGA-18-3412-01	6.3225	6.7365	LUSC	III	345	1	NA	160	30	None	Not amplified
TCGA-18-3414-01	5.4538	8.3335	LUSC	I	716	1	NA	321	55	None	Not amplified
TCGA-18-3415-01	9.7384	9.2117	LUSC	I	2803	1	NA	156	26	None	Not amplified
TCGA-18-3416-01	10.1019	11.3261	LUSC	I	973	1	NA	375	50	None	Not amplified
TCGA-18-3417-01	6.0065	7.3202	LUSC	I	1097	1	NA	259	35	None	Not amplified
TCGA-18-3419-01	6.15	8.8821	LUSC	I	50	0	NA	343	76	None	Not amplified
TCGA-18-3421-01	7.6148	9.8203	LUSC	I	2645	0	NA	338	19	None	Not amplified
TCGA-18-4083-01	10.0137	8.4651	LUSC	I	188	1	NA	281	38	None	Not amplified
TCGA-18-4086-01	7.9686	7.9845	LUSC	I	85	1	NA	137	17	None	Not amplified
TCGA-18-4721-01	9.3008	9.2167	LUSC	I	4694	0	NA	143	27	None	Not amplified
TCGA-18-5592-01	5.7243	8.3081	LUSC	I	1519	0	NA	261	31	None	Not amplified
TCGA-18-5595-01	6.6436	5.9668	LUSC	III	827	1	NA	203	47	HPV	Not amplified
TCGA-19-0957-02	4.7927	5.6142	GBM	III	666	1	NA	NA	NA	None	NA
TCGA-19-1389-02	6.5733	6.1388	GBM	III	141	1	NA	NA	NA	None	NA
TCGA-19-1390-01	3.9684	2.9854	GBM	II	772	1	NA	77	12	None	Not amplified
TCGA-19-1787-01	5.1302	5.7309	GBM	III	385	1	NA	191	NA	None	Not amplified
TCGA-19-2619-01	4.0326	4.104	GBM	II	294	0	NA	7	11	None	Not amplified
TCGA-19-2620-01	4.6851	4.2716	GBM	II	148	1	NA	50	10	None	Not amplified
TCGA-19-2624-01	1.9591	5.4965	GBM	II	5	1	NA	11	15	None	Not amplified
TCGA-19-2625-01	4.7338	2.7298	GBM	II	124	1	NA	44	7	None	Not amplified
TCGA-19-2629-01	3.8812	4.6757	GBM	II	737	1	NA	47	24	None	Not amplified
TCGA-19-4065-01	7.3148	6.427	GBM	III	214	0	NA	27	NA	None	Not amplified
TCGA-19-4065-02	6.9849	5.9056	GBM	III	214	0	NA	NA	NA	None	NA
TCGA-19-5960-01	6.0266	4.2389	GBM	III	165	0	NA	31	11	None	Not amplified
TCGA-20-1682-01	4.0822	8.1028	OV	IV	837	0	NA	NA	NA	None	Not amplified
TCGA-20-1683-01	4.0427	7.0417	OV	IV	772	0	NA	NA	NA	None	Not amplified
TCGA-20-1684-01	3.3867	3.0907	OV	II	581	0	NA	NA	NA	None	Not amplified
TCGA-20-1685-01	3.8028	6.5653	OV	II	508	0	NA	NA	NA	None	Not amplified
TCGA-20-1687-01	4.7441	6.3234	OV	II	81	0	NA	NA	NA	None	Not amplified
TCGA-21-1070-01	8.4061	9.9868	LUSC	I	3636	0	NA	434	76	None	Not amplified
TCGA-21-1071-01	6.8885	7.9092	LUSC	I	1426	1	NA	170	30	None	Not amplified
TCGA-21-1072-01	6.7341	6.9196	LUSC	III	3016	0	NA	NA	NA	None	Not amplified
TCGA-21-1075-01	7.7921	3.7878	LUSC	III	2134	0	NA	NA	NA	None	Not amplified
TCGA-21-1076-01	7.19125	8.5481	LUSC	I	1852	0	NA	256	38	None	Not amplified
TCGA-21-1077-01	6.905	6.6282	LUSC	III	1058	1	NA	181	32	None	Not amplified
TCGA-21-1078-01	3.8709	4.8792	LUSC	II	474	1	NA	72	21	None	Not amplified
TCGA-21-1079-01	8.209	5.8753	LUSC	III	965	1	NA	NA	NA	None	Not amplified
TCGA-21-1080-01	5.4464	8.6983	LUSC	I	3724	0	NA	NA	NA	None	Not amplified
TCGA-21-1081-01	4.4768	6.1051	LUSC	II	284	1	NA	167	29	None	Not amplified
TCGA-21-1082-01	4.9369	8.4862	LUSC	I	3644	0	NA	NA	NA	None	Not amplified
TCGA-21-1083-01	9.5185	8.8314	LUSC	I	1315	1	NA	NA	NA	None	Not amplified
TCGA-21-5782-01	4.8056	7.8678	LUSC	I	962	1	NA	332	68	None	Not amplified
TCGA-21-5783-01	4.8944	6.2679	LUSC	III	2680	1	NA	NA	NA	None	Not amplified
TCGA-21-5784-01	4.5582	8.4675	LUSC	IV	908	0	NA	194	21	None	Not amplified
TCGA-21-5786-01	4.8038	7.5866	LUSC	I	661	0	NA	336	58	None	Not amplified
TCGA-21-5787-01	5.9294	11.329	LUSC	I	329	1	NA	353	57	None	Not amplified
TCGA-21-A5DI-01	5.9242	6.7634	LUSC	III	979	0	NA	NA	NA	None	Not amplified
TCGA-22-0940-01	7.1382	10.1812	LUSC	I	669	1	NA	NA	NA	None	Not amplified
TCGA-22-0944-01	5.5672	6.3586	LUSC	III	223	1	NA	104	11	None	Not amplified
TCGA-22-1000-01	6.3734	9.1834	LUSC	I	454	1	NA	NA	NA	None	Not amplified
TCGA-22-1002-01	5.7444	8.042	LUSC	I	131	1	NA	207	42	None	Not amplified
TCGA-22-1005-01	6.1759	10.6428	LUSC	I	1953	1	NA	NA	NA	None	Not amplified
TCGA-22-1011-01	6.4512	8.5867	LUSC	I	53	1	NA	91	19	None	Not amplified
TCGA-22-1012-01	6.0709	7.761	LUSC	I	429	1	NA	232	46	None	Not amplified
TCGA-22-1016-01	6.3666	6.983	LUSC	III	822	1	NA	293	41	None	Not amplified
TCGA-22-1017-01	8.9476	8.2717	LUSC	I	1485	1	NA	NA	NA	None	Not amplified
TCGA-22-4591-01	5.5541	7.1499	LUSC	I	623	1	NA	212	56	None	Not amplified
TCGA-22-4593-01	5.2486	7.1886	LUSC	I	1067	1	NA	160	34	None	Not amplified
TCGA-22-4594-01	5.7756	8.4509	LUSC	I	1470	1	NA	NA	NA	None	Not amplified
TCGA-22-4595-01	6.009	7.8504	LUSC	I	734	1	NA	280	56	None	Not amplified
TCGA-22-4596-01	8.7193	8.6637	LUSC	I	17	1	NA	NA	NA	None	Not amplified
TCGA-22-4599-01	7.4622	10.196	LUSC	I	1161	1	NA	322	42	None	Not amplified
TCGA-22-4601-01	6.8	7.3971	LUSC	I	1057	1	NA	175	33	None	Not amplified
TCGA-22-4604-01	8.322	8.5634	LUSC	I	399	1	NA	225	47	None	Not amplified
TCGA-22-4605-01	7.2164	6.6309	LUSC	III	974	1	NA	NA	NA	None	Not amplified
TCGA-22-4607-01	4.523	6.3879	LUSC	II	587	1	NA	83	18	None	Not amplified
TCGA-22-4609-01	7.4786	9.3932	LUSC	I	291	1	NA	NA	NA	None	Not amplified
TCGA-22-4613-01	6.3649	8.6538	LUSC	I	358	1	NA	540	90	None	Not amplified
TCGA-22-5471-01	6.4189	10.6918	LUSC	I	965	0	NA	218	22	None	Not amplified
TCGA-22-5472-01	5.0883	7.1296	LUSC	I	1975	1	NA	317	66	None	Not amplified
TCGA-22-5473-01	9.4344	7.1088	LUSC	I	1933	1	NA	669	131	None	Amplified
TCGA-22-5474-01	9.2785	9.639	LUSC	I	445	1	NA	90	17	None	Not amplified
TCGA-22-5477-01	9.32	8.1594	LUSC	I	1346	1	NA	145	30	None	Not amplified
TCGA-22-5478-01	4.4459	6.8016	LUSC	II	24	1	NA	156	22	None	Not amplified
TCGA-22-5479-01	7.3411	7.812	LUSC	I	1651	0	NA	NA	NA	None	Not amplified
TCGA-22-5480-01	7.6147	7.6445	LUSC	I	2170	1	NA	140	32	None	Not amplified
TCGA-22-5481-01	8.4686	9.1047	LUSC	I	2409	1	NA	NA	NA	None	Not amplified
TCGA-22-5482-01	4.9529	6.0015	LUSC	III	357	1	NA	146	20	None	Not amplified
TCGA-22-5483-01	5.5765	8.2561	LUSC	I	573	1	NA	NA	NA	None	Not amplified
TCGA-22-5485-01	7.06	6.4603	LUSC	III	916	1	NA	179	30	None	Not amplified
TCGA-22-5489-01	8.082	8.9258	LUSC	I	1912	1	NA	205	37	None	Not amplified
TCGA-22-5491-01	6.2847	7.5019	LUSC	I	1713	1	NA	316	65	None	Not amplified
TCGA-22-5492-01	6.8882	8.8061	LUSC	I	506	1	NA	188	25	None	Not amplified
TCGA-22-A5C4-01	4.3074	6.7729	LUSC	II	671	0	NA	NA	NA	None	Not amplified
TCGA-23-1023-01	3.9811	7.2024	OV	IV	1233	0	NA	30	NA	None	Not amplified
TCGA-23-1026-01	4.3027	7.8669	OV	IV	816	0	NA	26	NA	None	Not amplified
TCGA-23-1027-01	3.4267	5.4351	OV	II	976	1	NA	NA	4	None	Not amplified
TCGA-23-1029-01	5.9365	5.2381	OV	III	268	0	NA	NA	NA	None	Not amplified
TCGA-23-1109-01	2.7368	6.6324	OV	II	1562	1	NA	5	NA	None	Not amplified
TCGA-23-1111-01	3.5417	4.0046	OV	II	98	0	NA	NA	NA	None	Not amplified
TCGA-23-1114-01	2.8499	2.639	OV	II	2089	1	NA	NA	NA	None	Not amplified
TCGA-23-1120-01	5.5159	7.883	OV	I	130	0	NA	105	NA	None	Not amplified
TCGA-23-1122-01	4.6456	4.6055	OV	II	1189	1	NA	NA	19	None	Not amplified
TCGA-23-1123-01	5.4488	8.571	OV	I	1018	1	NA	NA	12	None	Not amplified
TCGA-23-1809-01	4.005	5.0539	OV	II	16	0	NA	NA	NA	None	Not amplified
TCGA-23-2077-01	4.2294	6.1461	OV	II	3525	0	NA	NA	15	None	Not amplified
TCGA-23-2081-01	3.5312	5.8821	OV	II	2342	1	NA	NA	6	None	Not amplified
TCGA-23-2084-01	5.3731	5.2823	OV	III	1516	1	NA	NA	NA	None	Amplified
TCGA-24-0975-01	2.3664	6.5014	OV	II	663	1	NA	NA	10	None	Not amplified
TCGA-24-1103-01	2.7255	5.8364	OV	II	1646	1	NA	NA	19	None	Not amplified
TCGA-24-1413-01	5.9763	5.0449	OV	III	192	0	NA	NA	5	None	Not amplified
TCGA-24-1416-01	4.1068	4.7664	OV	II	194	0	NA	NA	2	None	Not amplified
TCGA-24-1417-01	6.4321	8.11	OV	I	238	0	NA	NA	8	None	Amplified
TCGA-24-1418-01	3.9144	6.2521	OV	II	243	0	NA	NA	9	None	Not amplified
TCGA-24-1419-01	2.5332	2.7298	OV	II	239	0	NA	NA	6	None	Not amplified
TCGA-24-1423-01	4.5717	6.134	OV	II	190	0	NA	NA	10	None	Not amplified
TCGA-24-1424-01	5.3571	6.3712	OV	III	183	0	NA	NA	3	None	Not amplified
TCGA-24-1427-01	3.6784	8.2861	OV	IV	147	0	NA	NA	9	None	Not amplified
TCGA-24-1428-01	4.9576	6.7419	OV	III	529	0	NA	NA	3	None	Not amplified
TCGA-24-1430-01	2.1257	4.5673	OV	II	863	1	NA	NA	NA	None	Not amplified
TCGA-24-1436-01	5.9275	6.8945	OV	III	260	1	NA	NA	3	None	Amplified
TCGA-24-1467-01	4.4161	6.5727	OV	II	3224	1	NA	NA	NA	None	Not amplified
TCGA-24-1469-01	4.0669	6.3846	OV	II	277	0	NA	NA	21	None	Not amplified
TCGA-24-1474-01	3.6109	5.4411	OV	II	676	1	NA	NA	16	None	Not amplified
TCGA-24-1544-01	2.7959	7.9697	OV	IV	820	1	NA	17	NA	None	Not amplified
TCGA-24-1548-01	5.5542	5.2854	OV	III	493	1	NA	26	NA	None	Not amplified
TCGA-24-1549-01	5.2266	7.6387	OV	I	1721	1	NA	NA	8	None	Not amplified
TCGA-24-1550-01	4.6575	6.8098	OV	II	1249	1	NA	NA	NA	None	Not amplified
TCGA-24-1551-01	5.9599	7.7523	OV	I	1579	1	NA	NA	8	None	Not amplified
TCGA-24-1552-01	2.5633	5.6975	OV	II	1259	1	NA	NA	9	None	Not amplified
TCGA-24-1553-01	5.2643	10.8089	OV	I	1767	1	NA	28	NA	None	Not amplified
TCGA-24-1555-01	3.5482	5.775	OV	II	2692	1	NA	40	NA	None	Not amplified
TCGA-24-1556-01	5.8813	7.444	OV	I	2148	1	NA	44	NA	None	Not amplified
TCGA-24-1557-01	3.311	2.9155	OV	II	1213	1	NA	39	NA	None	Not amplified
TCGA-24-1558-01	3.5384	4.3221	OV	II	594	1	NA	20	NA	None	Not amplified
TCGA-24-1560-01	4.1396	5.5969	OV	II	1341	1	NA	21	NA	None	Not amplified
TCGA-24-1562-01	4.4051	7.3295	OV	IV	1384	1	NA	NA	9	None	Not amplified
TCGA-24-1563-01	5.4298	6.1308	OV	III	1451	1	NA	NA	8	None	Not amplified
TCGA-24-1564-01	4.5245	7.3745	OV	IV	787	1	NA	NA	8	None	Not amplified
TCGA-24-1567-01	4.0669	6.9976	OV	IV	524	1	NA	38	NA	None	Not amplified
TCGA-24-1603-01	4.5733	5.3416	OV	II	2742	1	NA	NA	2	None	Not amplified
TCGA-24-1604-01	4.895	5.9889	OV	III	2688	1	NA	49	NA	None	Not amplified
TCGA-24-1616-01	3.0852	4.0255	OV	II	1163	1	NA	NA	10	None	Not amplified
TCGA-24-1842-01	6.4386	9.0471	OV	I	253	0	NA	NA	NA	None	Amplified
TCGA-24-1843-01	3.5311	8.0944	OV	IV	106	0	NA	NA	NA	None	Not amplified
TCGA-24-1844-01	3.0451	1.912	OV	II	113	0	NA	NA	NA	None	Not amplified
TCGA-24-1846-01	8.3862	6.6365	OV	III	133	0	NA	NA	NA	None	Amplified
TCGA-24-1847-01	6.0684	10.5237	OV	I	343	0	NA	NA	NA	None	Not amplified
TCGA-24-1850-01	5.3167	7.673	OV	I	168	0	NA	NA	NA	None	Not amplified
TCGA-24-1924-01	5.5692	8.9403	OV	I	919	1	NA	NA	NA	None	Amplified
TCGA-24-1930-01	5.7722	7.9986	OV	I	2467	1	NA	NA	NA	None	Not amplified
TCGA-24-2019-01	4.3017	8.2291	OV	IV	148	0	NA	NA	9	None	Not amplified
TCGA-24-2020-01	4.0208	3.8655	OV	II	4624	1	NA	NA	NA	None	Not amplified
TCGA-24-2023-01	4.9881	6.6555	OV	III	1364	1	NA	NA	NA	None	Not amplified
TCGA-24-2024-01	2.6416	5.5091	OV	II	1769	1	NA	NA	22	None	Not amplified
TCGA-24-2026-01	5.5002	7.5342	OV	I	1059	1	NA	NA	NA	None	Amplified
TCGA-24-2027-01	3.9254	4.8436	OV	II	3337	1	NA	NA	NA	None	Not amplified
TCGA-24-2033-01	3.6735	5.3491	OV	II	562	1	NA	NA	NA	None	Not amplified
TCGA-24-2035-01	3.9882	7.7876	OV	IV	857	1	NA	NA	17	None	Not amplified
TCGA-24-2036-01	2.4795	2.2847	OV	II	1947	1	NA	NA	NA	None	Not amplified
TCGA-24-2038-01	3.2442	4.5521	OV	II	1354	1	NA	NA	3	None	Not amplified
TCGA-24-2254-01	2.9568	3.5761	OV	II	1736	1	NA	NA	10	None	Not amplified
TCGA-24-2261-01	5.2756	8.9934	OV	I	24	1	NA	NA	8	None	Not amplified
TCGA-24-2262-01	6.2576	7.9226	OV	I	11	1	NA	NA	18	None	Not amplified
TCGA-24-2267-01	6.9105	8.7092	OV	I	1446	1	NA	NA	20	None	Not amplified
TCGA-24-2271-01	3.9677	7.7317	OV	IV	962	1	NA	NA	4	None	Not amplified
TCGA-24-2281-01	5.86	8.0132	OV	I	1357	0	NA	NA	8	None	Not amplified
TCGA-24-2288-01	5.6085	8.3752	OV	I	25	1	NA	NA	28	None	Not amplified
TCGA-24-2290-01	5.5691	4.8391	OV	III	1102	1	NA	NA	10	None	Not amplified
TCGA-24-2297-01	3.9432	5.3182	OV	II	1699	1	NA	NA	NA	None	Not amplified
TCGA-24-2298-01	4.5455	6.4707	OV	II	1620	1	NA	NA	13	None	Not amplified
TCGA-25-1312-01	3.6491	5.3885	OV	II	31	1	NA	NA	NA	None	Not amplified
TCGA-25-1313-01	5.085	5.1817	OV	III	820	1	NA	NA	23	None	Not amplified
TCGA-25-1314-01	4.4617	6.7655	OV	II	1004	1	NA	NA	NA	None	Not amplified
TCGA-25-1315-01	4.0403	5.1219	OV	II	1583	1	NA	NA	10	None	Not amplified
TCGA-25-1316-01	3.8587	8.0734	OV	IV	1279	1	NA	NA	1	None	Not amplified
TCGA-25-1317-01	3.735	5.5539	OV	II	61	1	NA	39	NA	None	Not amplified
TCGA-25-1318-01	3.8631	4.4916	OV	II	1064	1	NA	45	NA	None	Not amplified
TCGA-25-1319-01	5.3794	7.0974	OV	I	1977	1	NA	NA	14	None	Not amplified
TCGA-25-1321-01	2.364	3.7168	OV	II	1033	1	NA	NA	7	None	Not amplified
TCGA-25-1322-01	5.5704	3.7586	OV	III	91	1	NA	NA	6	None	Not amplified
TCGA-25-1323-01	4.1774	4.2424	OV	II	395	1	NA	NA	NA	None	Not amplified
TCGA-25-1324-01	4.1992	7.5018	OV	IV	1035	1	NA	36	NA	None	NA
TCGA-25-1326-01	4.3196	7.1548	OV	IV	1249	1	NA	NA	23	None	NA
TCGA-25-1328-01	3.6162	5.6598	OV	II	2009	1	NA	NA	0	None	NA
TCGA-25-1329-01	4.2746	6.6033	OV	II	457	1	NA	NA	4	None	Not amplified
TCGA-25-1623-01	6.1109	8.6646	OV	I	565	1	NA	9	NA	None	Not amplified
TCGA-25-1625-01	4.1638	6.7792	OV	II	840	1	NA	29	NA	None	Not amplified
TCGA-25-1627-01	3.124	5.6242	OV	II	394	1	NA	24	NA	None	Not amplified
TCGA-25-1630-01	3.4517	4.8615	OV	II	1162	1	NA	36	NA	None	Not amplified
TCGA-25-1631-01	4.7399	5.351	OV	II	9	1	NA	20	NA	None	Not amplified
TCGA-25-1632-01	1.8828	2.4874	OV	II	1799	1	NA	35	NA	None	Not amplified
TCGA-25-1633-01	5.0129	8.6263	OV	I	1891	1	NA	9	NA	None	Not amplified
TCGA-25-1634-01	0	1.9451	OV	II	1091	1	NA	22	NA	None	Not amplified
TCGA-25-1635-01	3.5588	7.9179	OV	IV	1583	1	NA	16	NA	None	Not amplified
TCGA-25-1870-01	2.7255	4.6626	OV	II	455	1	NA	NA	NA	None	Not amplified
TCGA-25-1871-01	2.2631	3.3546	OV	II	760	1	NA	NA	NA	None	Not amplified
TCGA-25-2391-01	3.9937	7.129	OV	IV	1492	1	NA	NA	8	None	Not amplified
TCGA-25-2392-01	4.5419	6.1	OV	II	31	1	NA	NA	19	None	Not amplified
TCGA-25-2393-01	3.6098	7.1511	OV	IV	1157	1	NA	NA	7	None	Not amplified
TCGA-25-2396-01	5.5544	7.6428	OV	I	92	1	NA	NA	4	None	Not amplified
TCGA-25-2397-01	3.003	5.6316	OV	II	365	1	NA	NA	NA	None	Not amplified
TCGA-25-2399-01	5.0625	7.4917	OV	I	608	1	NA	NA	5	None	Not amplified
TCGA-25-2400-01	3.635	5.4469	OV	II	1278	1	NA	NA	18	None	Not amplified
TCGA-25-2404-01	5.2697	7.124	OV	I	883	1	NA	NA	8	None	Not amplified
TCGA-25-2409-01	4.2347	6.0756	OV	II	821	1	NA	NA	5	None	Not amplified
TCGA-26-1442-01	4.2349	3.922	GBM	II	953	0	NA	27	14	None	Not amplified
TCGA-26-5132-01	4.7879	5.6957	GBM	III	286	0	NA	36	6	None	Not amplified
TCGA-26-5133-01	5.2525	8.162	GBM	I	452	0	NA	23	12	None	Not amplified
TCGA-26-5134-01	2.8374	5.3918	GBM	II	167	0	NA	40	6	None	Not amplified
TCGA-26-5135-01	4.2266	5.1366	GBM	II	270	1	NA	37	7	None	Not amplified
TCGA-26-5136-01	3.8654	5.9026	GBM	II	577	1	NA	33	12	None	Not amplified
TCGA-26-5139-01	5.0075	4.7585	GBM	III	48	0	NA	45	10	None	Not amplified
TCGA-27-1830-01	4.4825	7.0974	GBM	IV	154	1	NA	33	6	None	Not amplified
TCGA-27-1831-01	6.5585	6.8544	GBM	III	505	1	NA	35	10	None	Not amplified
TCGA-27-1832-01	4.9239	6.5689	GBM	III	300	1	NA	21	7	None	Not amplified
TCGA-27-1834-01	6.2545	7.3614	GBM	I	1233	1	NA	10	10	None	Not amplified
TCGA-27-1835-01	6.6744	4.3522	GBM	III	648	1	NA	45	11	None	Not amplified
TCGA-27-1837-01	6.6225	3.7997	GBM	III	427	1	NA	9	7	None	Not amplified
TCGA-27-2519-01	6.0819	5.8857	GBM	III	316	0	NA	29	6	None	Not amplified
TCGA-27-2521-01	1.8653	4.3803	GBM	II	316	0	NA	29	16	None	Not amplified
TCGA-27-2523-01	7.5134	6.8463	GBM	III	489	1	NA	34	14	None	Not amplified
TCGA-27-2524-01	5.3193	5.7629	GBM	III	231	1	NA	30	11	None	Not amplified
TCGA-27-2526-01	4.4821	7.6908	GBM	IV	87	1	NA	40	13	None	Not amplified
TCGA-27-2528-01	5.9301	4.6596	GBM	III	480	1	NA	36	7	None	Not amplified
TCGA-28-1747-01	5.1964	5.5821	GBM	III	77	1	NA	33	7	None	Not amplified
TCGA-28-1753-01	4.4171	5.4552	GBM	II	37	0	NA	31	7	None	Not amplified
TCGA-28-2499-01	6.522	4.7066	GBM	III	NA	NA	NA	26	9	None	NA
TCGA-28-2509-01	6.2025	4.7307	GBM	III	145	0	NA	35	12	None	Not amplified
TCGA-28-2510-01	5.1515	5.914	GBM	III	NA	NA	NA	19	NA	NA	Not amplified
TCGA-28-2513-01	6.3811	5.0799	GBM	III	222	0	NA	54	12	None	Not amplified
TCGA-28-2514-01	5.7296	5.5568	GBM	III	160	0	NA	11	4	None	Not amplified
TCGA-28-5204-01	6.3065	4.5484	GBM	III	454	1	NA	34	8	None	Not amplified
TCGA-28-5207-01	4.2343	5.8905	GBM	II	343	1	NA	32	12	None	Not amplified
TCGA-28-5208-01	4.3332	5.3317	GBM	II	474	0	NA	43	10	None	Not amplified
TCGA-28-5209-01	4.512	2.4469	GBM	II	442	0	NA	62	14	None	Not amplified
TCGA-28-5213-01	4.5109	6.5065	GBM	II	298	0	NA	36	5	None	Not amplified
TCGA-28-5215-01	4.4669	6.4601	GBM	II	335	1	NA	23	8	None	Not amplified
TCGA-28-5216-01	4.2043	5.5338	GBM	II	415	0	NA	33	5	None	Not amplified
TCGA-28-5218-01	2.2829	8.9745	GBM	IV	157	1	NA	17	7	None	Not amplified
TCGA-28-5220-01	3.5684	4.7091	GBM	II	319	0	NA	8	8	None	Not amplified
TCGA-29-1688-01	4.5302	7.7175	OV	IV	2400	1	NA	NA	NA	None	Not amplified
TCGA-29-1690-01	3.4786	7.0848	OV	IV	1448	1	NA	NA	NA	None	Not amplified
TCGA-29-1691-01	2.8588	6.6825	OV	II	1470	1	NA	NA	NA	None	Not amplified
TCGA-29-1693-01	3.987	5.9912	OV	II	3096	0	NA	NA	NA	None	Not amplified
TCGA-29-1694-01	3.5774	6.116	OV	II	1187	1	NA	NA	NA	None	Not amplified
TCGA-29-1695-01	4.834	7.5707	OV	I	1229	1	NA	NA	NA	None	Not amplified
TCGA-29-1696-01	3.4635	6.0381	OV	II	1032	1	NA	NA	NA	None	Not amplified
TCGA-29-1697-01	5.4451	6.4243	OV	III	949	1	NA	NA	NA	None	Not amplified
TCGA-29-1699-01	5.6223	5.9194	OV	III	1106	1	NA	NA	NA	None	Not amplified
TCGA-29-1701-01	3.4181	8.3838	OV	IV	515	1	NA	NA	NA	None	Not amplified
TCGA-29-1702-01	1.8886	5.5871	OV	II	728	1	NA	NA	NA	None	Not amplified
TCGA-29-1703-01	4.7431	5.855	OV	II	1815	1	NA	NA	NA	None	Not amplified
TCGA-29-1705-01	2.6585	6.1454	OV	II	555	1	NA	NA	NA	None	Not amplified
TCGA-29-1710-01	5.1395	8.4923	OV	I	951	1	NA	NA	NA	None	Not amplified
TCGA-29-1711-01	4.8835	8.7182	OV	I	1053	0	NA	NA	NA	None	Not amplified
TCGA-29-1761-01	4.3842	8.1537	OV	IV	528	1	NA	NA	NA	None	Not amplified
TCGA-29-1762-01	4.0842	2.9774	OV	II	2634	1	NA	NA	NA	None	Not amplified
TCGA-29-1763-01	5.0046	6.4165	OV	III	2032	0	NA	NA	NA	None	Amplified
TCGA-29-1770-01	2.7966	5.1677	OV	II	741	0	NA	NA	NA	None	Not amplified
TCGA-29-1770-02	2.9212	4.5657	OV	II	741	0	NA	NA	NA	None	NA
TCGA-29-1776-01	4.4224	6.9089	OV	II	360	0	NA	NA	NA	None	Not amplified
TCGA-29-1778-01	5.0098	7.343	OV	I	454	0	NA	NA	NA	None	Not amplified
TCGA-29-1781-01	6.981	9.7257	OV	I	255	0	NA	NA	NA	None	Amplified
TCGA-29-1783-01	3.9558	7.4661	OV	IV	220	0	NA	NA	NA	None	Not amplified
TCGA-29-1784-01	5.5012	8.5725	OV	I	163	0	NA	NA	NA	None	Not amplified
TCGA-29-1785-01	5.1941	9.1133	OV	I	1104	1	NA	NA	NA	None	Not amplified
TCGA-29-2414-01	3.2659	5.8605	OV	II	2621	1	NA	NA	NA	None	Not amplified
TCGA-29-2414-02	5.8401	9.1238	OV	I	2621	1	NA	NA	NA	None	NA
TCGA-29-2425-01	3.7585	5.4288	OV	II	1977	0	NA	NA	NA	None	Not amplified
TCGA-29-2427-01	4.9736	9.745	OV	I	1900	0	NA	NA	4	None	Not amplified
TCGA-29-2428-01	5.8792	8.6061	OV	I	1372	0	NA	NA	NA	None	Not amplified
TCGA-2A-A8VL-01	2.8438	6.6419	PRAD	II	621	0	NA	NA	NA	NA	Not amplified
TCGA-2A-A8VO-01	2.8036	6.5244	PRAD	II	1332	0	NA	NA	NA	NA	Not amplified
TCGA-2A-A8VT-01	3.9391	6.8312	PRAD	II	995	0	NA	NA	NA	NA	Not amplified
TCGA-2A-A8VV-01	1.2702	5.7087	PRAD	II	671	0	NA	NA	NA	NA	Not amplified
TCGA-2A-A8VX-01	1.8152	4.5955	PRAD	II	1033	0	NA	NA	NA	NA	Not amplified
TCGA-2A-A8W1-01	2.6309	5.5339	PRAD	II	112	0	NA	NA	NA	NA	Not amplified
TCGA-2A-A8W3-01	2.659	6.5582	PRAD	II	771	0	NA	NA	NA	NA	Not amplified
TCGA-2A-AAYF-01	2.7954	5.6136	PRAD	II	972	0	NA	NA	NA	NA	Not amplified
TCGA-2A-AAYO-01	3.3839	7.3902	PRAD	IV	922	0	NA	NA	NA	NA	Not amplified
TCGA-2A-AAYU-01	1.9863	5.451	PRAD	II	615	0	NA	NA	NA	NA	Not amplified
TCGA-2E-A9G8-01	3.127	7.1685	UCEC	IV	1249	0	NA	NA	NA	NA	Not amplified
TCGA-2F-A9KO-01	6.4187	9.4918	BLCA	I	678	0	NA	NA	NA	NA	Not amplified
TCGA-2F-A9KP-01	2.6803	4.2399	BLCA	II	364	1	NA	NA	NA	NA	Not amplified
TCGA-2F-A9KQ-01	1.919	3.5439	BLCA	II	2787	0	NA	NA	NA	NA	Not amplified
TCGA-2F-A9KR-01	3.6319	5.4818	BLCA	II	3148	0	NA	NA	NA	NA	Not amplified
TCGA-2F-A9KT-01	1.7054	4.2547	BLCA	II	3215	0	NA	NA	NA	NA	Not amplified
TCGA-2F-A9KW-01	7.4499	4.3111	BLCA	III	254	1	NA	NA	NA	NA	Not amplified
TCGA-2G-AAEW-01	7.0816	8.1862	TGCT	I	618	1	NA	41	NA	NA	Not amplified
TCGA-2G-AAEX-01	4.6131	9.4895	TGCT	IV	923	0	NA	57	NA	NA	Not amplified
TCGA-2G-AAF1-01	6.6647	8.8198	TGCT	I	1165	0	NA	35	NA	NA	Not amplified
TCGA-2G-AAF4-01	5.1777	9.9133	TGCT	I	1816	0	NA	44	NA	NA	Not amplified
TCGA-2G-AAF6-01	6.1701	9.8984	TGCT	I	3113	0	NA	49	NA	NA	Not amplified
TCGA-2G-AAF8-01	4.2878	9.5635	TGCT	IV	3723	0	NA	70	NA	NA	Not amplified
TCGA-2G-AAFE-01	5.9248	8.2101	TGCT	I	4702	0	NA	NA	NA	NA	Not amplified
TCGA-2G-AAFG-01	6.8157	10.1441	TGCT	I	5819	0	NA	66	NA	NA	Not amplified
TCGA-2G-AAFG-05	6.3802	10.5059	TGCT	I	5819	0	NA	60	NA	NA	NA
TCGA-2G-AAFH-01	6.3664	10.1926	TGCT	I	1125	0	NA	60	NA	NA	Not amplified
TCGA-2G-AAFI-01	6.0952	7.7086	TGCT	I	430	0	NA	53	NA	NA	Not amplified
TCGA-2G-AAFJ-01	2.4541	4.2793	TGCT	II	NA	NA	NA	58	NA	NA	Not amplified
TCGA-2G-AAFL-01	4.308	8.6487	TGCT	IV	522	0	NA	44	NA	NA	Not amplified
TCGA-2G-AAFM-01	4.6891	9.2008	TGCT	IV	291	0	NA	53	NA	NA	Not amplified
TCGA-2G-AAFN-01	2.9899	7.1904	TGCT	IV	452	0	NA	42	NA	NA	Not amplified
TCGA-2G-AAFO-01	3.4899	8.3331	TGCT	IV	502	0	NA	37	NA	NA	Not amplified
TCGA-2G-AAFV-01	2.807	6.2146	TGCT	II	1238	0	NA	53	NA	NA	Not amplified
TCGA-2G-AAFY-01	5.5612	9.3056	TGCT	I	1099	0	NA	27	NA	NA	Not amplified
TCGA-2G-AAFZ-01	3.838	6.2076	TGCT	II	1122	0	NA	47	NA	NA	Not amplified
TCGA-2G-AAG0-01	5.6204	7.5311	TGCT	I	1217	0	NA	68	NA	NA	Not amplified
TCGA-2G-AAG3-01	4.5388	7.7128	TGCT	IV	1593	0	NA	58	NA	NA	Not amplified
TCGA-2G-AAG5-01	3.3557	6.9932	TGCT	II	2167	0	NA	58	NA	NA	Not amplified
TCGA-2G-AAG6-01	2.5603	6.8638	TGCT	II	2196	0	NA	49	NA	NA	Not amplified
TCGA-2G-AAG7-01	2.1201	7.111	TGCT	IV	1877	0	NA	59	NA	NA	Not amplified
TCGA-2G-AAG8-01	3.7534	6.6871	TGCT	II	1923	0	NA	52	NA	NA	Not amplified
TCGA-2G-AAG9-01	5.8238	9.1023	TGCT	I	1926	0	NA	70	NA	NA	Not amplified
TCGA-2G-AAGA-01	2.0746	6.1988	TGCT	II	2075	0	NA	73	NA	NA	Not amplified
TCGA-2G-AAGC-01	6.0208	9.8431	TGCT	I	2216	0	NA	63	NA	NA	Not amplified
TCGA-2G-AAGE-01	4.0914	6.2976	TGCT	II	2080	0	NA	82	NA	NA	Not amplified
TCGA-2G-AAGF-01	3.4869	5.4676	TGCT	II	2426	0	NA	57	NA	NA	Not amplified
TCGA-2G-AAGG-01	4.3621	8.903	TGCT	IV	2057	0	NA	72	NA	NA	Not amplified
TCGA-2G-AAGI-01	5.8768	8.3003	TGCT	I	2801	0	NA	73	NA	NA	Not amplified
TCGA-2G-AAGI-05	5.4567	9.939	TGCT	I	2801	0	NA	56	NA	NA	NA
TCGA-2G-AAGJ-01	5.6941	7.7958	TGCT	I	2284	0	NA	65	NA	NA	Not amplified
TCGA-2G-AAGK-01	5.995	8.9218	TGCT	I	3290	0	NA	44	NA	NA	Not amplified
TCGA-2G-AAGM-01	3.315	5.8611	TGCT	II	1814	0	NA	62	NA	NA	Not amplified
TCGA-2G-AAGN-01	4.8572	6.7445	TGCT	III	3236	0	NA	44	NA	NA	Not amplified
TCGA-2G-AAGO-01	3.7633	6.4444	TGCT	II	3498	0	NA	66	NA	NA	Not amplified
TCGA-2G-AAGP-01	5.8989	9.9283	TGCT	I	3669	0	NA	54	NA	NA	Not amplified
TCGA-2G-AAGS-01	1.621	4.9588	TGCT	II	1803	0	NA	44	NA	NA	Not amplified
TCGA-2G-AAGT-01	3.339	5.7689	TGCT	II	3789	0	NA	72	NA	NA	Not amplified
TCGA-2G-AAGV-01	2.3154	5.6399	TGCT	II	3922	0	NA	55	NA	NA	Not amplified
TCGA-2G-AAGW-01	1.5056	3.5893	TGCT	II	1869	0	NA	55	NA	NA	Not amplified
TCGA-2G-AAGX-01	2.1899	5.1124	TGCT	II	5181	0	NA	53	NA	NA	Not amplified
TCGA-2G-AAGY-01	3.4741	8.6293	TGCT	IV	2462	0	NA	59	NA	NA	Not amplified
TCGA-2G-AAGY-05	3.7963	7.9393	TGCT	IV	2462	0	NA	54	NA	NA	NA
TCGA-2G-AAGZ-01	4.2024	8.734	TGCT	IV	1830	0	NA	55	NA	NA	Not amplified
TCGA-2G-AAH0-01	4.9844	8.5785	TGCT	I	1833	0	NA	48	NA	NA	Not amplified
TCGA-2G-AAH2-01	6.1023	8.9351	TGCT	I	1820	0	NA	44	NA	NA	Not amplified
TCGA-2G-AAH3-01	5.3434	6.667	TGCT	III	1822	0	NA	58	NA	NA	Not amplified
TCGA-2G-AAH4-01	4.038	7.468	TGCT	IV	3823	0	NA	57	NA	NA	Not amplified
TCGA-2G-AAH8-01	5.6652	8.7424	TGCT	I	1881	0	NA	67	NA	NA	Not amplified
TCGA-2G-AAHA-01	8.3084	7.9745	TGCT	I	2997	0	NA	64	NA	NA	Not amplified
TCGA-2G-AAHC-01	7.7556	10.046	TGCT	I	1817	0	NA	60	NA	NA	Not amplified
TCGA-2G-AAHG-01	4.174	8.2905	TGCT	IV	1819	0	NA	48	NA	NA	Not amplified
TCGA-2G-AAHL-01	3.5969	7.9555	TGCT	IV	1819	0	NA	62	NA	NA	Not amplified
TCGA-2G-AAHN-01	6.2264	9.0376	TGCT	I	2781	0	NA	58	NA	NA	Not amplified
TCGA-2G-AAHP-01	2.0792	8.6102	TGCT	IV	5358	0	NA	68	NA	NA	Not amplified
TCGA-2G-AAHP-05	4.8885	9.0835	TGCT	I	5358	0	NA	76	NA	NA	NA
TCGA-2G-AAHT-01	6.6217	7.6242	TGCT	I	185	0	NA	69	NA	NA	Not amplified
TCGA-2G-AAKD-01	4.0426	7.8134	TGCT	IV	3726	0	NA	31	NA	NA	Not amplified
TCGA-2G-AAKG-01	4.139	8.2374	TGCT	IV	6468	0	NA	63	NA	NA	Not amplified
TCGA-2G-AAKG-05	3.3435	9.0545	TGCT	IV	6468	0	NA	62	NA	NA	NA
TCGA-2G-AAKH-01	5.2016	8.4726	TGCT	I	4919	0	NA	98	NA	NA	Not amplified
TCGA-2G-AAKL-01	4.8839	7.485	TGCT	I	2910	0	NA	57	NA	NA	Not amplified
TCGA-2G-AAKM-01	3.3072	5.9702	TGCT	II	6972	1	NA	45	NA	NA	Not amplified
TCGA-2G-AAKO-01	6.5725	9.6873	TGCT	I	NA	NA	NA	52	NA	NA	Not amplified
TCGA-2G-AAKO-05	7.6512	10.3797	TGCT	I	NA	NA	NA	49	NA	NA	NA
TCGA-2G-AAL5-01	2.4879	4.1263	TGCT	II	5609	0	NA	58	NA	NA	Not amplified
TCGA-2G-AAL7-01	3.1415	7.0061	TGCT	IV	3991	0	NA	52	NA	NA	Not amplified
TCGA-2G-AALF-01	3.1818	7.3107	TGCT	IV	NA	NA	NA	57	NA	NA	Not amplified
TCGA-2G-AALG-01	1.3673	7.6328	TGCT	IV	NA	NA	NA	47	NA	NA	Not amplified
TCGA-2G-AALN-01	2.2388	5.7503	TGCT	II	NA	NA	NA	42	NA	NA	Not amplified
TCGA-2G-AALO-01	3.3459	6.8142	TGCT	II	NA	NA	NA	54	NA	NA	Not amplified
TCGA-2G-AALP-01	3.4861	6.5012	TGCT	II	2147	0	NA	66	NA	NA	Not amplified
TCGA-2G-AALQ-01	2.2525	6.5016	TGCT	II	NA	NA	NA	58	NA	NA	Not amplified
TCGA-2G-AALR-01	3.4594	4.5484	TGCT	II	NA	NA	NA	75	NA	NA	Not amplified
TCGA-2G-AALS-01	5.6605	9.5317	TGCT	I	NA	NA	NA	45	NA	NA	Not amplified
TCGA-2G-AALT-01	2.3188	8.0941	TGCT	IV	NA	NA	NA	39	NA	NA	Not amplified
TCGA-2G-AALW-01	4.9643	8.2373	TGCT	I	NA	NA	NA	55	NA	NA	Not amplified
TCGA-2G-AALX-01	3.4744	8.5605	TGCT	IV	NA	NA	NA	58	NA	NA	Not amplified
TCGA-2G-AALY-01	2.7342	8.2251	TGCT	IV	NA	NA	NA	45	NA	NA	Not amplified
TCGA-2G-AALZ-01	3.8979	8.6734	TGCT	IV	NA	NA	NA	56	NA	NA	Not amplified
TCGA-2G-AAM2-01	3.5895	7.606	TGCT	IV	NA	NA	NA	25	NA	NA	Not amplified
TCGA-2G-AAM3-01	1.5767	5.622	TGCT	II	NA	NA	NA	52	NA	NA	Not amplified
TCGA-2G-AAM4-01	2.7379	7.0733	TGCT	IV	NA	NA	NA	52	NA	NA	Not amplified
TCGA-2H-A9GF-01	3.38619	5.97613	ESCA	II	784	1	MSI-L	247	NA	NA	Not amplified
TCGA-2H-A9GG-01	4.66213	7.76389	ESCA	IV	610	1	MSI-L	NA	NA	NA	NA
TCGA-2H-A9GH-01	3.7014	6.50016	ESCA	II	951	1	MSS	110	NA	NA	Not amplified
TCGA-2H-A9GI-01	3.52263	6.08728	ESCA	II	435	1	MSS	177	NA	NA	Not amplified
TCGA-2H-A9GJ-01	2.76399	5.66377	ESCA	II	1781	1	MSS	102	NA	NA	Not amplified
TCGA-2H-A9GK-01	6.61813	7.38212	ESCA	I	232	1	MSS	157	NA	NA	Not amplified
TCGA-2H-A9GL-01	5.71422	6.9798	ESCA	III	180	1	MSS	197	NA	NA	Not amplified
TCGA-2H-A9GM-01	4.3403	6.11672	ESCA	II	424	1	MSS	94	NA	NA	Not amplified
TCGA-2H-A9GN-01	6.09753	4.36318	ESCA	III	272	1	MSS	107	NA	NA	Not amplified
TCGA-2H-A9GO-01	2.31513	3.26539	ESCA	II	494	1	MSS	126	NA	NA	Not amplified
TCGA-2H-A9GQ-01	4.14191	3.97428	ESCA	II	128	1	MSS	118	NA	NA	Not amplified
TCGA-2H-A9GR-01	3.3609	5.82382	ESCA	II	987	1	MSI-L	286	NA	NA	Not amplified
TCGA-2J-AAB1-01	5.0529	8.052	PAAD	I	66	1	NA	103	NA	NA	Not amplified
TCGA-2J-AAB4-01	5.0621	7.9397	PAAD	I	729	0	NA	50	NA	NA	Not amplified
TCGA-2J-AAB6-01	6.8163	5.5427	PAAD	III	293	1	NA	85	NA	NA	Not amplified
TCGA-2J-AAB8-01	4.4384	7.1111	PAAD	IV	80	0	NA	76	NA	NA	Not amplified
TCGA-2J-AAB9-01	4.7968	8.0997	PAAD	I	627	1	NA	39	NA	NA	Not amplified
TCGA-2J-AABA-01	3.5418	7.8741	PAAD	IV	607	1	NA	48	NA	NA	Not amplified
TCGA-2J-AABE-01	4.2853	5.3164	PAAD	II	676	0	NA	51	NA	NA	Not amplified
TCGA-2J-AABF-01	5.3085	8.3008	PAAD	I	691	1	NA	71	NA	NA	Not amplified
TCGA-2J-AABH-01	3.7688	5.9229	PAAD	II	677	0	NA	49	NA	NA	Not amplified
TCGA-2J-AABI-01	4.4384	5.839	PAAD	II	969	0	NA	NA	NA	NA	Not amplified
TCGA-2J-AABK-01	4.6727	7.7227	PAAD	IV	484	0	NA	56	NA	NA	Not amplified
TCGA-2J-AABO-01	3.172	7.2969	PAAD	IV	440	0	NA	108	NA	NA	Not amplified
TCGA-2J-AABP-01	5.9049	8.9694	PAAD	I	360	0	NA	NA	NA	NA	Not amplified
TCGA-2J-AABR-01	5.1551	9.4973	PAAD	I	438	0	NA	40	NA	NA	Not amplified
TCGA-2J-AABT-01	4.2591	7.7938	PAAD	IV	319	0	NA	NA	NA	NA	Not amplified
TCGA-2J-AABU-01	4.9296	7.6805	PAAD	I	277	1	NA	39	NA	NA	Not amplified
TCGA-2J-AABV-01	2.053	7.8012	PAAD	IV	652	1	NA	48	NA	NA	Not amplified
TCGA-2K-A9WE-01	5.6529	8.6627	KIRP	I	214	0	NA	NA	NA	NA	Not amplified
TCGA-2L-AAQA-01	4.1933	5.7464	PAAD	II	143	1	NA	76	NA	NA	Not amplified
TCGA-2L-AAQE-01	3.2934	7.7014	PAAD	IV	684	1	NA	62	NA	NA	Not amplified
TCGA-2L-AAQI-01	5.0683	6.8718	PAAD	III	103	1	NA	65	NA	NA	Not amplified
TCGA-2L-AAQJ-01	3.3793	7.0518	PAAD	IV	394	1	NA	127	NA	NA	Not amplified
TCGA-2L-AAQL-01	1.8429	7.3347	PAAD	IV	292	1	NA	82	NA	NA	Not amplified
TCGA-2L-AAQM-01	3.0218	5.872	PAAD	II	1383	0	NA	NA	NA	NA	Not amplified
TCGA-2V-A95S-01	6.062	10.7343	LIHC	I	NA	NA	NA	NA	NA	NA	Not amplified
TCGA-2W-A8YY-01	4.065	6.7541	CESC	II	NA	NA	NA	NA	NA	NA	Not amplified
TCGA-2X-A9D5-01	6.6243	9.2051	TGCT	I	83	0	NA	56	NA	NA	Not amplified
TCGA-2X-A9D6-01	6.5224	8.9837	TGCT	I	4	0	NA	41	NA	NA	Not amplified
TCGA-2Y-A9GS-01	3.5046	5.1497	LIHC	II	724	1	NA	NA	NA	NA	Not amplified
TCGA-2Y-A9GT-01	4.7551	9.8721	LIHC	I	1624	1	NA	NA	NA	NA	Not amplified
TCGA-2Y-A9GU-01	1.4159	6.265	LIHC	II	1939	0	NA	NA	NA	NA	Not amplified
TCGA-2Y-A9GV-01	4.1635	5.9911	LIHC	II	2532	1	NA	NA	NA	NA	Not amplified
TCGA-2Y-A9GW-01	4.7163	5.2396	LIHC	II	1271	1	NA	NA	NA	NA	Not amplified
TCGA-2Y-A9GX-01	4.8819	8.7073	LIHC	I	2442	0	NA	NA	NA	NA	Not amplified
TCGA-2Y-A9GY-01	3.6145	9.6944	LIHC	IV	757	1	NA	NA	NA	NA	Not amplified
TCGA-2Y-A9GZ-01	3.4904	4.2802	LIHC	II	848	1	NA	NA	NA	NA	Not amplified
TCGA-2Y-A9H0-01	4.0013	9.3311	LIHC	IV	3675	0	NA	NA	NA	NA	Not amplified
TCGA-2Y-A9H1-01	2.9888	7.2194	LIHC	IV	1229	1	NA	NA	NA	NA	Not amplified
TCGA-2Y-A9H2-01	4.5982	6.8654	LIHC	II	1731	0	NA	NA	NA	NA	Not amplified
TCGA-2Y-A9H3-01	2.8487	8.2987	LIHC	IV	1257	0	NA	NA	NA	NA	Not amplified
TCGA-2Y-A9H4-01	0.9708	6.3846	LIHC	II	1452	0	NA	NA	NA	NA	Not amplified
TCGA-2Y-A9H5-01	2.4248	6.476	LIHC	II	555	1	NA	NA	NA	NA	Not amplified
TCGA-2Y-A9H6-01	1.983	6.5662	LIHC	II	357	0	NA	NA	NA	NA	Not amplified
TCGA-2Y-A9H7-01	1.1	5.3584	LIHC	II	1133	0	NA	NA	NA	NA	Not amplified
TCGA-2Y-A9H8-01	3.1799	8.7582	LIHC	IV	633	1	NA	NA	NA	NA	Not amplified
TCGA-2Y-A9H9-01	2.9699	6.6535	LIHC	II	456	0	NA	NA	NA	NA	Not amplified
TCGA-2Y-A9HA-01	3.5246	2.9198	LIHC	II	36	1	NA	NA	NA	NA	Not amplified
TCGA-2Y-A9HB-01	5.1551	8.6347	LIHC	I	260	0	NA	NA	NA	NA	Not amplified
TCGA-2Z-A9J1-01	3.895	6.9703	KIRP	II	2298	0	NA	NA	NA	NA	Not amplified
TCGA-2Z-A9J2-01	2.2378	6.4549	KIRP	II	1795	0	NA	NA	NA	NA	Not amplified
TCGA-2Z-A9J3-01	4.5509	4.3606	KIRP	II	1771	1	NA	NA	NA	NA	Not amplified
TCGA-2Z-A9J5-01	4.2509	7.8844	KIRP	IV	3050	0	NA	NA	NA	NA	Not amplified
TCGA-2Z-A9J6-01	4.1286	5.7135	KIRP	II	1731	0	NA	NA	NA	NA	Not amplified
TCGA-2Z-A9J7-01	2.06	4.3976	KIRP	II	139	1	NA	NA	NA	NA	Not amplified
TCGA-2Z-A9J8-01	7.6122	6.1856	KIRP	III	2047	0	NA	NA	NA	NA	Not amplified
TCGA-2Z-A9J9-01	4.4556	5.9357	KIRP	II	2294	0	NA	NA	NA	NA	Not amplified
TCGA-2Z-A9JD-01	4.1792	5.0285	KIRP	II	1060	0	NA	NA	NA	NA	Not amplified
TCGA-2Z-A9JE-01	2.9795	3.227	KIRP	II	1728	0	NA	NA	NA	NA	Not amplified
TCGA-2Z-A9JG-01	4.6186	7.0845	KIRP	IV	1662	0	NA	NA	NA	NA	Not amplified
TCGA-2Z-A9JI-01	3.9495	8.09	KIRP	IV	1567	0	NA	NA	NA	NA	Not amplified
TCGA-2Z-A9JJ-01	4.7277	4.9365	KIRP	II	1085	0	NA	NA	NA	NA	Not amplified
TCGA-2Z-A9JK-01	3.5279	7.108	KIRP	IV	1186	0	NA	NA	NA	NA	Not amplified
TCGA-2Z-A9JL-01	4.622	5.9805	KIRP	II	804	0	NA	NA	NA	NA	Not amplified
TCGA-2Z-A9JM-01	3.5517	8.0027	KIRP	IV	934	0	NA	NA	NA	NA	Not amplified
TCGA-2Z-A9JN-01	6.9274	5.7685	KIRP	III	740	0	NA	NA	NA	NA	Not amplified
TCGA-2Z-A9JO-01	7.8838	5.5713	KIRP	III	949	0	NA	NA	NA	NA	Not amplified
TCGA-2Z-A9JP-01	3.9661	6.7244	KIRP	II	893	0	NA	NA	NA	NA	Not amplified
TCGA-2Z-A9JQ-01	2.1242	4.4775	KIRP	II	778	0	NA	NA	NA	NA	Not amplified
TCGA-2Z-A9JR-01	4.3508	7.5098	KIRP	IV	161	0	NA	NA	NA	NA	Not amplified
TCGA-2Z-A9JS-01	4.2122	5.4442	KIRP	II	492	1	NA	NA	NA	NA	Not amplified
TCGA-2Z-A9JT-01	1.9739	8.3554	KIRP	IV	684	0	NA	NA	NA	NA	Not amplified
TCGA-30-1718-01	3.2207	7.2399	OV	IV	1579	1	NA	NA	NA	None	Not amplified
TCGA-30-1855-01	3.6557	7.5864	OV	IV	75	1	NA	NA	NA	None	Not amplified
TCGA-30-1860-01	5.6773	9.1357	OV	I	1366	1	NA	NA	NA	None	Not amplified
TCGA-30-1862-01	3.8431	7.2657	OV	IV	186	1	NA	NA	12	None	Not amplified
TCGA-30-1891-01	2.7941	7.6679	OV	IV	914	1	NA	NA	6	None	Not amplified
TCGA-31-1944-01	4.284	6.4039	OV	II	1386	0	NA	NA	NA	None	Not amplified
TCGA-31-1950-01	4.3337	6.5157	OV	II	571	0	NA	NA	NA	None	Not amplified
TCGA-31-1951-01	6.1542	7.197	OV	I	684	0	NA	NA	NA	None	Not amplified
TCGA-31-1953-01	5.9218	8.2312	OV	I	204	0	NA	NA	5	None	Not amplified
TCGA-31-1956-01	6.8654	10.0362	OV	I	1342	0	NA	NA	NA	None	Not amplified
TCGA-32-1970-01	5.0794	4.971	GBM	III	468	1	NA	55	13	None	Not amplified
TCGA-32-1980-01	4.7547	6.3791	GBM	III	36	1	NA	10	2	None	Not amplified
TCGA-32-1982-01	5.9893	7.1931	GBM	I	142	1	NA	53	12	None	Not amplified
TCGA-32-2615-01	6.5984	5.8148	GBM	III	485	1	NA	20	8	None	Not amplified
TCGA-32-2616-01	5.5656	5.3868	GBM	III	224	1	NA	338	NA	None	Not amplified
TCGA-32-2632-01	5.0706	7.4564	GBM	I	269	1	NA	59	11	None	Not amplified
TCGA-32-2634-01	3.9126	7.4639	GBM	IV	270	0	NA	38	5	None	Not amplified
TCGA-32-2638-01	7.9647	5.3609	GBM	III	224	0	NA	7	9	None	Not amplified
TCGA-32-4213-01	4.4581	6.5221	GBM	II	357	0	NA	38	15	None	Not amplified
TCGA-32-5222-01	5.6372	4.3999	GBM	III	165	0	NA	48	16	None	Not amplified
TCGA-33-4532-01	5.3105	6.4073	LUSC	III	2524	0	NA	346	52	None	Not amplified
TCGA-33-4533-01	3.9407	7.6225	LUSC	IV	3469	0	NA	262	42	None	Not amplified
TCGA-33-4538-01	8.899	7.6436	LUSC	I	2981	1	NA	169	NA	None	Not amplified
TCGA-33-4547-01	3.882	5.4883	LUSC	II	1311	0	NA	186	45	None	Not amplified
TCGA-33-4566-01	6.7037	9.2865	LUSC	I	5295	1	NA	1087	169	None	Not amplified
TCGA-33-4579-01	5.7773	7.3201	LUSC	I	NA	NA	NA	NA	NA	NA	NA
TCGA-33-4582-01	2.4552	6.7079	LUSC	II	3149	1	NA	169	19	None	Not amplified
TCGA-33-4583-01	8.7287	8.669	LUSC	I	4299	0	NA	464	59	None	Not amplified
TCGA-33-4586-01	8.6759	5.3793	LUSC	III	428	1	NA	294	44	None	Not amplified
TCGA-33-4587-01	4.262	6.409	LUSC	II	1656	1	NA	NA	NA	None	Not amplified
TCGA-33-4589-01	8.6956	9.4903	LUSC	I	47	1	NA	NA	NA	None	Not amplified
TCGA-33-6737-01	6.6904	7.8792	LUSC	I	601	1	NA	384	77	None	Not amplified
TCGA-33-6738-01	3.8644	6.8716	LUSC	II	822	0	NA	NA	NA	None	Not amplified
TCGA-33-A4WN-01	6.6977	6.5141	LUSC	III	143	1	NA	NA	NA	None	Not amplified
TCGA-33-A5GW-01	7.0716	4.574	LUSC	III	9	1	NA	NA	NA	None	Not amplified
TCGA-33-AAS8-01	6.4445	6.0519	LUSC	III	1114	1	NA	NA	NA	NA	Not amplified
TCGA-33-AASB-01	3.0408	5.3059	LUSC	II	211	1	NA	NA	NA	NA	Not amplified
TCGA-33-AASD-01	5.0569	6.0051	LUSC	III	3376	1	NA	NA	NA	NA	Not amplified
TCGA-33-AASI-01	5.4399	8.689	LUSC	I	1344	1	NA	NA	NA	NA	Not amplified
TCGA-33-AASJ-01	8.1826	7.274	LUSC	I	3600	1	NA	NA	NA	NA	Not amplified
TCGA-33-AASL-01	5.779	7.2615	LUSC	I	826	1	NA	NA	NA	NA	Not amplified
TCGA-34-2596-01	10.2706	7.3797	LUSC	I	80	1	NA	216	26	None	Not amplified
TCGA-34-2600-01	3.4876	6.0705	LUSC	II	1874	1	NA	445	83	None	Not amplified
TCGA-34-2608-01	5.9246	8.3454	LUSC	I	1000	1	NA	129	22	None	Not amplified
TCGA-34-5231-01	5.4243	8.7475	LUSC	I	1984	1	NA	558	93	None	Not amplified
TCGA-34-5232-01	5.6996	8.5036	LUSC	I	2062	0	NA	156	32	None	Not amplified
TCGA-34-5234-01	5.5487	9.8372	LUSC	I	1715	0	NA	160	22	None	Not amplified
TCGA-34-5236-01	4.8527	7.0082	LUSC	I	276	1	NA	185	37	None	Not amplified
TCGA-34-5239-01	7.438	9.7752	LUSC	I	707	0	NA	205	34	None	Not amplified
TCGA-34-5240-01	7.8145	7.2997	LUSC	I	365	0	NA	143	22	None	Not amplified
TCGA-34-5241-01	6.1835	8.7906	LUSC	I	515	1	NA	3	0	None	Not amplified
TCGA-34-5927-01	3.3987	6.2788	LUSC	II	941	0	NA	251	47	None	Not amplified
TCGA-34-5928-01	5.8123	7.8539	LUSC	I	552	0	NA	339	72	None	Not amplified
TCGA-34-5929-01	4.8425	6.4309	LUSC	III	151	1	NA	177	37	None	Not amplified
TCGA-34-7107-01	8.9893	7.0395	LUSC	I	34	1	NA	NA	NA	None	Not amplified
TCGA-34-8454-01	5.6944	8.8276	LUSC	I	827	0	NA	NA	NA	None	Not amplified
TCGA-34-8455-01	4.9855	7.2571	LUSC	I	123	1	NA	NA	NA	None	Not amplified
TCGA-34-8456-01	7.6636	7.4813	LUSC	I	804	0	NA	NA	NA	None	Not amplified
TCGA-34-A5IX-01	5.2541	7.3601	LUSC	I	636	0	NA	NA	NA	None	Not amplified
TCGA-35-3615-01	4.5089	7.4308	LUAD	IV	14	0	NA	106	34	None	Not amplified
TCGA-35-4122-01	8.0894	9.7812	LUAD	I	225	0	NA	NA	25	None	Not amplified
TCGA-35-4123-01	9.0645	11.6923	LUAD	I	182	0	NA	NA	30	None	Not amplified
TCGA-35-5375-01	6.3183	9.3886	LUAD	I	264	0	NA	NA	75	None	Not amplified
TCGA-36-1568-01	4.8896	7.1447	OV	I	875	0	NA	35	NA	None	Not amplified
TCGA-36-1570-01	5.2574	5.0336	OV	III	655	0	NA	21	NA	None	Not amplified
TCGA-36-1571-01	3.4485	5.133	OV	II	695	1	NA	8	NA	None	Not amplified
TCGA-36-1574-01	4.3948	6.3776	OV	II	686	0	NA	16	NA	None	Not amplified
TCGA-36-1575-01	4.1886	5.1683	OV	II	260	0	NA	30	NA	None	Not amplified
TCGA-36-1577-01	2.5327	6.6291	OV	II	783	0	NA	56	NA	None	Not amplified
TCGA-36-1578-01	5.5624	8.3994	OV	I	847	0	NA	46	NA	None	Not amplified
TCGA-36-1580-01	4.6947	8.0786	OV	IV	737	1	NA	11	NA	None	Not amplified
TCGA-36-1581-01	6.2226	9.3583	OV	I	751	0	NA	NA	NA	None	Not amplified
TCGA-37-3783-01	6.115	10.2384	LUSC	I	120	0	NA	331	69	None	Not amplified
TCGA-37-3789-01	5.765	9.066	LUSC	I	13	0	NA	381	85	None	Not amplified
TCGA-37-3792-01	9.5063	9.3907	LUSC	I	12	0	NA	NA	NA	None	Not amplified
TCGA-37-4129-01	3.0961	7.8615	LUSC	IV	200	0	NA	NA	NA	None	Not amplified
TCGA-37-4130-01	6.0532	11.9444	LUSC	I	247	0	NA	NA	NA	None	Not amplified
TCGA-37-4132-01	5.9868	9.794	LUSC	I	227	0	NA	NA	NA	None	Not amplified
TCGA-37-4133-01	8.6006	8.5694	LUSC	I	238	0	NA	249	40	None	Not amplified
TCGA-37-4135-01	4.7341	7.7678	LUSC	IV	207	0	NA	253	45	None	Not amplified
TCGA-37-4141-01	6.0635	9.6507	LUSC	I	12	0	NA	296	63	None	Not amplified
TCGA-37-5819-01	4.3687	8.3172	LUSC	IV	103	0	NA	662	NA	None	Not amplified
TCGA-37-A5EL-01	2.3223	6.9624	LUSC	II	NA	NA	NA	NA	NA	None	Not amplified
TCGA-37-A5EM-01	6.032	8.5897	LUSC	I	NA	NA	NA	NA	NA	None	NA
TCGA-37-A5EN-01	5.9307	7.9879	LUSC	I	NA	NA	NA	NA	NA	None	Not amplified
TCGA-38-4625-01	10.4492	8.5807	LUAD	I	2973	0	NA	NA	78	None	Not amplified
TCGA-38-4626-01	7.2851	7.8871	LUAD	I	2595	0	NA	246	46	None	Not amplified
TCGA-38-4627-01	5.4248	7.306	LUAD	I	1147	1	NA	33	10	None	Not amplified
TCGA-38-4628-01	4.7334	5.1348	LUAD	II	1492	1	NA	131	21	None	Not amplified
TCGA-38-4629-01	8.1602	9.4195	LUAD	I	864	1	NA	NA	46	None	Not amplified
TCGA-38-4630-01	4.854	7.6893	LUAD	I	1073	1	NA	NA	28	None	Not amplified
TCGA-38-4631-01	3.9189	7.5827	LUAD	IV	354	1	NA	631	100	None	Not amplified
TCGA-38-4632-01	7.2151	8.5996	LUAD	I	1357	1	NA	459	75	None	Not amplified
TCGA-38-6178-01	4.3576	6.3038	LUAD	II	448	0	NA	62	12	None	Not amplified
TCGA-38-7271-01	6.3619	10.4978	LUAD	I	800	1	NA	NA	NA	None	Not amplified
TCGA-38-A44F-01	4.8277	8.3401	LUAD	I	133	0	NA	NA	NA	None	Not amplified
TCGA-39-5011-01	6.7594	9.3851	LUSC	I	1454	0	NA	NA	NA	None	Not amplified
TCGA-39-5016-01	9.8704	9.1254	LUSC	I	2253	0	NA	291	50	None	Not amplified
TCGA-39-5019-01	6.8224	8.329	LUSC	I	1361	0	NA	158	24	None	Not amplified
TCGA-39-5021-01	6.9721	8.9484	LUSC	I	2086	1	NA	121	10	None	Not amplified
TCGA-39-5022-01	7.8409	10.2854	LUSC	I	1679	1	NA	260	58	None	Not amplified
TCGA-39-5024-01	5.0995	7.6201	LUSC	I	2130	0	NA	180	51	None	Not amplified
TCGA-39-5027-01	6.1132	6.2213	LUSC	III	1849	0	NA	296	40	None	Not amplified
TCGA-39-5028-01	6.0456	8.0632	LUSC	I	52	1	NA	169	26	None	Not amplified
TCGA-39-5029-01	4.298	9.072	LUSC	IV	740	1	NA	133	20	None	Not amplified
TCGA-39-5030-01	7.8793	9.925	LUSC	I	59	1	NA	246	78	None	Not amplified
TCGA-39-5031-01	5.4998	8.4527	LUSC	I	833	0	NA	537	158	None	Not amplified
TCGA-39-5034-01	5.2315	7.8152	LUSC	I	1107	1	NA	NA	NA	None	Not amplified
TCGA-39-5035-01	10.1582	10.1121	LUSC	I	474	0	NA	133	17	None	Amplified
TCGA-39-5036-01	6.6263	8.094	LUSC	I	1084	0	NA	258	38	None	Not amplified
TCGA-39-5037-01	6.0998	5.5253	LUSC	III	1086	0	NA	204	33	None	Not amplified
TCGA-39-5039-01	4.5328	8.2966	LUSC	IV	544	1	NA	146	33	None	Not amplified
TCGA-39-5040-01	7.1361	7.0339	LUSC	I	519	1	NA	NA	NA	None	Not amplified
TCGA-3A-A9I5-01	2.6786	5.8734	PAAD	II	1612	0	NA	58	NA	NA	Not amplified
TCGA-3A-A9I7-01	4.7202	8.2157	PAAD	IV	718	0	NA	38	NA	NA	Not amplified
TCGA-3A-A9I9-01	3.6891	7.6592	PAAD	IV	634	1	NA	107	NA	NA	Not amplified
TCGA-3A-A9IB-01	5.7605	6.0857	PAAD	III	224	1	NA	79	NA	NA	Not amplified
TCGA-3A-A9IC-01	4.3405	6.5058	PAAD	II	738	1	NA	64	NA	NA	Not amplified
TCGA-3A-A9IH-01	4.8711	5.9126	PAAD	III	874	0	NA	76	NA	NA	Not amplified
TCGA-3A-A9IJ-01	2.8844	6.383	PAAD	II	1854	0	NA	NA	NA	NA	Not amplified
TCGA-3A-A9IL-01	4.5226	6.2992	PAAD	II	2558	0	NA	NA	NA	NA	Not amplified
TCGA-3A-A9IN-01	3.3558	7.0002	PAAD	IV	2084	0	NA	NA	NA	NA	Not amplified
TCGA-3A-A9IO-01	4.046	5.6479	PAAD	II	1942	0	NA	NA	NA	NA	Not amplified
TCGA-3A-A9IR-01	2.9148	5.4147	PAAD	II	1542	0	NA	NA	NA	NA	Not amplified
TCGA-3A-A9IS-01	3.8254	4.3278	PAAD	II	932	0	NA	NA	NA	NA	Not amplified
TCGA-3A-A9IU-01	4.4937	6.2421	PAAD	II	458	1	NA	63	NA	NA	Not amplified
TCGA-3A-A9IV-01	3.9628	3.544	PAAD	II	967	0	NA	NA	NA	NA	Not amplified
TCGA-3A-A9IX-01	5.038	9.1607	PAAD	I	1037	0	NA	51	NA	NA	Not amplified
TCGA-3A-A9IZ-01	4.3456	4.7952	PAAD	II	308	1	NA	76	NA	NA	Not amplified
TCGA-3A-A9J0-01	2.5243	6.3634	PAAD	II	377	0	NA	89	NA	NA	Not amplified
TCGA-3B-A9HI-01	4.8806	8.4464	SARC	I	NA	NA	NA	63	NA	NA	Not amplified
TCGA-3B-A9HJ-01	5.9762	9.8304	SARC	I	1104	0	NA	33	NA	NA	Not amplified
TCGA-3B-A9HL-01	1.702	5.8414	SARC	II	599	1	NA	60	NA	NA	Not amplified
TCGA-3B-A9HO-01	3.6266	11.0429	SARC	IV	NA	NA	NA	73	NA	NA	Not amplified
TCGA-3B-A9HP-01	4.3137	6.4993	SARC	II	1627	1	NA	50	NA	NA	Not amplified
TCGA-3B-A9HQ-01	6.1419	8.1653	SARC	I	2085	0	NA	64	NA	NA	Not amplified
TCGA-3B-A9HR-01	4.7506	2.8095	SARC	II	2694	1	NA	44	NA	NA	Not amplified
TCGA-3B-A9HS-01	4.5658	10.1251	SARC	IV	1366	1	NA	79	NA	NA	Not amplified
TCGA-3B-A9HT-01	7.0563	11.1493	SARC	I	1665	0	NA	317	NA	NA	Not amplified
TCGA-3B-A9HU-01	7.0296	9.8022	SARC	I	768	0	NA	33	NA	NA	Not amplified
TCGA-3B-A9HV-01	1.742	2.8586	SARC	II	NA	NA	NA	48	NA	NA	Not amplified
TCGA-3B-A9HX-01	6.6529	6.9847	SARC	III	1303	0	NA	51	NA	NA	Not amplified
TCGA-3B-A9HY-01	6.1528	7.4319	SARC	I	314	0	NA	49	NA	NA	Not amplified
TCGA-3B-A9HZ-01	6.1919	8.4037	SARC	I	943	0	NA	39	NA	NA	Not amplified
TCGA-3B-A9I0-01	5.0749	8.6285	SARC	I	1096	0	NA	36	NA	NA	Not amplified
TCGA-3B-A9I1-01	5.8545	5.6739	SARC	III	567	1	NA	39	NA	NA	Not amplified
TCGA-3B-A9I3-01	3.9845	8.1601	SARC	IV	808	0	NA	55	NA	NA	Not amplified
TCGA-3C-AAAU-01	3.7816	4.2936	BRCA	II	3928	0	NA	NA	NA	NA	Not amplified
TCGA-3C-AALI-01	5.1399	9.4247	BRCA	I	4005	0	NA	NA	NA	NA	Not amplified
TCGA-3C-AALJ-01	3.3314	8.9436	BRCA	IV	1302	0	NA	NA	NA	NA	Not amplified
TCGA-3C-AALK-01	3.7893	7.2868	BRCA	IV	1221	0	NA	NA	NA	NA	Not amplified
TCGA-3E-AAAY-01	4.7979	8.4516	PAAD	I	2285	0	NA	39	NA	NA	Not amplified
TCGA-3E-AAAZ-01	3.0189	6.6126	PAAD	II	2182	1	NA	72	NA	NA	Not amplified
TCGA-3G-AB0O-01	6.747	14.485	THYM	I	1723	0	NA	16	NA	NA	Not amplified
TCGA-3G-AB0Q-01	6.7002	9.5081	THYM	I	1799	0	NA	32	NA	NA	Not amplified
TCGA-3G-AB0T-01	6.4903	13.1862	THYM	I	2488	1	NA	21	NA	NA	Not amplified
TCGA-3G-AB14-01	8.0112	11.804	THYM	I	540	0	NA	18	NA	NA	Not amplified
TCGA-3G-AB19-01	9.6982	10.9769	THYM	I	2756	0	NA	22	NA	NA	Not amplified
TCGA-3H-AB3K-01	5.2321	5.9956	MESO	III	1715	1	NA	74	NA	NA	Not amplified
TCGA-3H-AB3L-01	4.2101	5.6592	MESO	II	361	1	NA	45	NA	NA	Not amplified
TCGA-3H-AB3M-01	2.7365	6.9686	MESO	II	885	1	NA	92	NA	NA	Not amplified
TCGA-3H-AB3O-01	7.4704	12.785	MESO	I	1302	1	NA	85	NA	NA	Not amplified
TCGA-3H-AB3S-01	2.1606	5.7431	MESO	II	385	1	NA	81	NA	NA	Not amplified
TCGA-3H-AB3T-01	7.555	9.834	MESO	I	414	1	NA	76	NA	NA	Not amplified
TCGA-3H-AB3U-01	3.447	7.6603	MESO	IV	826	1	NA	68	NA	NA	Not amplified
TCGA-3H-AB3X-01	3.3257	9.2105	MESO	IV	803	0	NA	65	NA	NA	Not amplified
TCGA-3K-AAZ8-01	2.6026	6.8511	LIHC	II	396	0	NA	NA	NA	NA	Not amplified
TCGA-3L-AA1B-01	3.5995	5.6252	COAD	II	349	0	MSS	NA	NA	NA	Not amplified
TCGA-3M-AB46-01	2.63555	5.22877	STAD	II	NA	NA	MSS	NA	NA	NA	Not amplified
TCGA-3M-AB47-01	4.1485	7.80643	STAD	IV	NA	NA	MSI-L	NA	NA	NA	Not amplified
TCGA-3N-A9WB-06	3.5237	2.8996	SKCM	II	518	1	NA	NA	NA	NA	Not amplified
TCGA-3N-A9WC-06	8.2523	11.0317	SKCM	I	2022	0	NA	NA	NA	NA	Not amplified
TCGA-3N-A9WD-06	5.131	9.0673	SKCM	I	395	1	NA	NA	NA	NA	Not amplified
TCGA-3Q-A9WF-01	7.245	13.9506	THYM	I	467	0	NA	12	NA	NA	Not amplified
TCGA-3R-A8YX-01	7.1437	6.7434	SARC	III	17	1	NA	61	NA	NA	Amplified
TCGA-3S-A8YW-01	4.2335	8.2587	THYM	IV	410	0	NA	45	NA	NA	Not amplified
TCGA-3S-AAYX-01	5.1837	14.2762	THYM	I	303	0	NA	26	NA	NA	Not amplified
TCGA-3T-AA9L-01	5.8157	14.1142	THYM	I	1050	0	NA	15	NA	NA	Not amplified
TCGA-3U-A98D-01	5.6271	7.2295	MESO	I	NA	NA	NA	60	NA	NA	Not amplified
TCGA-3U-A98E-01	6.0423	7.9402	MESO	I	NA	NA	NA	73	NA	NA	Not amplified
TCGA-3U-A98F-01	3.0736	6.0991	MESO	II	NA	NA	NA	72	NA	NA	Not amplified
TCGA-3U-A98G-01	6.2771	8.753	MESO	I	NA	NA	NA	45	NA	NA	Not amplified
TCGA-3U-A98H-01	4.8113	8.0034	MESO	I	NA	NA	NA	29	NA	NA	Not amplified
TCGA-3U-A98I-01	4.9645	6.8427	MESO	III	NA	NA	NA	61	NA	NA	Not amplified
TCGA-3U-A98J-01	3.351	8.5694	MESO	IV	NA	NA	NA	56	NA	NA	Not amplified
TCGA-3X-AAV9-01	4.0217	9.8874	CHOL	IV	339	1	NA	134	NA	NA	Not amplified
TCGA-3X-AAVA-01	3.076	7.4638	CHOL	IV	445	1	NA	85	NA	NA	Not amplified
TCGA-3X-AAVB-01	5.1506	7.2453	CHOL	I	402	0	NA	93	NA	NA	Not amplified
TCGA-3X-AAVC-01	5.0748	8.6768	CHOL	I	709	0	NA	135	NA	NA	Not amplified
TCGA-3X-AAVE-01	4.9525	9.421	CHOL	I	309	0	NA	94	NA	NA	Not amplified
TCGA-3Z-A93Z-01	5.1241	7.8917	KIRC	I	385	0	NA	NA	NA	NA	Not amplified
TCGA-41-2571-01	1.9797	6.5908	GBM	II	26	1	NA	36	6	None	Not amplified
TCGA-41-2572-01	5.2331	5.6207	GBM	III	406	1	NA	43	15	None	Not amplified
TCGA-41-3915-01	4.9375	7.2277	GBM	I	360	1	NA	31	14	None	Not amplified
TCGA-41-4097-01	6.0988	6.3904	GBM	III	6	1	NA	47	21	None	Not amplified
TCGA-41-5651-01	1.7815	5.9949	GBM	II	351	0	NA	64	14	None	Not amplified
TCGA-43-2576-01	5.1063	8.5003	LUSC	I	556	0	NA	NA	NA	None	Not amplified
TCGA-43-2578-01	4.9318	8.4275	LUSC	I	550	0	NA	262	58	None	Not amplified
TCGA-43-2581-01	6.1464	8.3233	LUSC	I	399	0	NA	NA	NA	None	Not amplified
TCGA-43-3394-01	7.0777	6.6151	LUSC	III	433	0	NA	138	37	None	Not amplified
TCGA-43-3920-01	5.5597	9.4678	LUSC	I	357	0	NA	259	51	None	Not amplified
TCGA-43-5668-01	6.9345	9.7419	LUSC	I	349	0	NA	534	63	None	Not amplified
TCGA-43-5670-01	3.3677	4.4221	LUSC	II	549	0	NA	NA	NA	None	Not amplified
TCGA-43-6143-01	6.113	5.9463	LUSC	III	376	0	NA	286	51	None	Not amplified
TCGA-43-6647-01	8.6751	7.648	LUSC	I	379	0	NA	146	27	None	Not amplified
TCGA-43-6770-01	8.3174	6.0424	LUSC	III	310	0	NA	192	34	None	Not amplified
TCGA-43-6771-01	7.5269	7.6876	LUSC	I	166	1	NA	173	43	None	Not amplified
TCGA-43-6773-01	7.4973	9.4635	LUSC	I	116	1	NA	NA	NA	None	Not amplified
TCGA-43-7656-01	7.4668	9.3399	LUSC	I	315	0	NA	NA	NA	None	Not amplified
TCGA-43-7657-01	3.7268	5.904	LUSC	II	236	0	NA	NA	NA	None	Not amplified
TCGA-43-7658-01	5.9105	9.8759	LUSC	I	2023	0	NA	NA	NA	None	Not amplified
TCGA-43-8115-01	6.4307	9.3603	LUSC	I	407	0	NA	NA	NA	None	Not amplified
TCGA-43-8116-01	4.3027	7.584	LUSC	IV	358	0	NA	NA	NA	None	Not amplified
TCGA-43-8118-01	4.7208	6.972	LUSC	II	89	1	NA	NA	NA	None	Not amplified
TCGA-43-A474-01	5.3819	2.9344	LUSC	III	353	0	NA	NA	NA	None	Not amplified
TCGA-43-A475-01	9.4475	10.8665	LUSC	I	296	0	NA	NA	NA	None	Not amplified
TCGA-43-A56U-01	6.2323	9.4092	LUSC	I	432	0	NA	NA	NA	None	Not amplified
TCGA-43-A56V-01	4.9253	6.2234	LUSC	III	366	0	NA	NA	NA	None	Not amplified
TCGA-44-2655-01	4.9318	7.0921	LUAD	I	575	0	NA	161	25	None	Not amplified
TCGA-44-2656-01	8.8111	10.496	LUAD	I	582	0	NA	989	128	None	Not amplified
TCGA-44-2657-01	6.0466	10.4646	LUAD	I	400	0	NA	342	38	None	Not amplified
TCGA-44-2659-01	5.7798	9.5117	LUAD	I	529	0	NA	364	75	None	Not amplified
TCGA-44-2661-01	6.6908	9.7907	LUAD	I	446	0	NA	49	22	None	Not amplified
TCGA-44-2662-01	8.6592	6.2421	LUAD	III	480	0	NA	184	54	None	Not amplified
TCGA-44-2665-01	7.355	6.7577	LUAD	III	400	0	NA	38	26	None	Not amplified
TCGA-44-2666-01	7.0976	7.9365	LUAD	I	97	1	NA	53	19	None	Not amplified
TCGA-44-2668-01	8.3563	9.5757	LUAD	I	246	0	NA	NA	48	None	Not amplified
TCGA-44-3396-01	8.2521	9.4379	LUAD	I	411	0	NA	155	32	None	Not amplified
TCGA-44-3398-01	7.752	8.1523	LUAD	I	253	0	NA	NA	25	None	Not amplified
TCGA-44-3918-01	9.4522	10.0747	LUAD	I	197	0	NA	NA	150	None	Not amplified
TCGA-44-3919-01	7.4322	9.1099	LUAD	I	190	0	NA	101	36	None	Not amplified
TCGA-44-4112-01	6.2725	8.0708	LUAD	I	370	0	NA	377	60	None	Not amplified
TCGA-44-5643-01	4.894	8.2214	LUAD	I	417	0	NA	NA	21	None	Not amplified
TCGA-44-5644-01	3.1667	6.8251	LUAD	II	498	0	NA	NA	NA	None	Not amplified
TCGA-44-5645-01	5.8813	7.8521	LUAD	I	383	0	NA	38	7	None	Not amplified
TCGA-44-6145-01	7.8474	10.4305	LUAD	I	328	0	NA	262	45	None	Not amplified
TCGA-44-6146-01	4.7879	6.7781	LUAD	III	302	0	NA	39	4	None	Not amplified
TCGA-44-6147-01	4.3696	8.2178	LUAD	IV	441	0	NA	175	27	None	Not amplified
TCGA-44-6148-01	5.4895	7.2125	LUAD	I	362	0	NA	NA	3	None	Not amplified
TCGA-44-6774-01	5.5689	6.826	LUAD	III	361	0	NA	270	30	None	Not amplified
TCGA-44-6775-01	6.2897	7.1936	LUAD	I	370	0	NA	66	28	None	Not amplified
TCGA-44-6776-01	4.2449	6.5931	LUAD	II	1938	0	NA	184	32	None	Not amplified
TCGA-44-6777-01	7.612	7.7095	LUAD	I	987	1	NA	337	80	None	Not amplified
TCGA-44-6778-01	8.2703	9.8727	LUAD	I	1110	0	NA	NA	73	None	Not amplified
TCGA-44-6779-01	7.1094	9.9315	LUAD	I	500	1	NA	98	27	None	Not amplified
TCGA-44-7659-01	6.1088	7.1749	LUAD	I	444	0	NA	130	NA	None	Not amplified
TCGA-44-7660-01	6.2292	6.7412	LUAD	III	325	0	NA	NA	NA	None	Not amplified
TCGA-44-7661-01	9.9704	8.0978	LUAD	I	366	0	NA	NA	NA	None	Not amplified
TCGA-44-7662-01	7.1425	7.9429	LUAD	I	218	0	NA	508	NA	None	Not amplified
TCGA-44-7667-01	4.7353	6.402	LUAD	II	557	0	NA	NA	NA	None	Not amplified
TCGA-44-7669-01	6.544	8.3189	LUAD	I	574	1	NA	NA	NA	None	Not amplified
TCGA-44-7670-01	5.438	7.5309	LUAD	I	531	0	NA	930	NA	None	Not amplified
TCGA-44-7671-01	4.3377	5.7947	LUAD	II	535	0	NA	194	NA	None	Not amplified
TCGA-44-7672-01	7.1885	8.868	LUAD	I	418	0	NA	145	NA	None	Not amplified
TCGA-44-8117-01	6.7924	7.4843	LUAD	I	385	0	NA	NA	NA	None	Not amplified
TCGA-44-8119-01	5.873	7.9341	LUAD	I	99	0	NA	NA	NA	None	Not amplified
TCGA-44-8120-01	5.4742	7.1094	LUAD	I	260	0	NA	NA	NA	None	Not amplified
TCGA-44-A479-01	6.8676	9.968	LUAD	I	392	0	NA	NA	NA	None	Not amplified
TCGA-44-A47A-01	6.1624	7.2718	LUAD	I	466	0	NA	NA	NA	None	Not amplified
TCGA-44-A47B-01	4.3081	9.0348	LUAD	IV	287	0	NA	NA	NA	None	Not amplified
TCGA-44-A47G-01	7.6691	9.829	LUAD	I	351	0	NA	NA	NA	None	Not amplified
TCGA-44-A4SS-01	6.0155	9.2294	LUAD	I	415	0	NA	NA	NA	None	Not amplified
TCGA-44-A4SU-01	5.4659	7.0698	LUAD	I	409	1	NA	NA	NA	None	Not amplified
TCGA-46-3765-01	6.0036	7.8365	LUSC	I	NA	NA	NA	285	51	None	Not amplified
TCGA-46-3766-01	6.1903	9.4286	LUSC	I	NA	NA	NA	1	0	None	Not amplified
TCGA-46-3767-01	5.6186	8.0218	LUSC	I	NA	NA	NA	174	28	None	Not amplified
TCGA-46-3768-01	6.6909	6.8378	LUSC	III	304	1	NA	300	63	None	Not amplified
TCGA-46-3769-01	6.8481	9.0356	LUSC	I	NA	NA	NA	734	111	None	Not amplified
TCGA-46-6025-01	8.3139	6.7695	LUSC	III	324	0	NA	173	41	None	Not amplified
TCGA-46-6026-01	2.0507	6.5124	LUSC	II	423	0	NA	180	33	None	Not amplified
TCGA-49-4486-01	3.2697	6.9813	LUAD	II	2318	1	NA	221	64	None	Not amplified
TCGA-49-4487-01	5.8858	10.0429	LUAD	I	855	1	NA	342	76	None	Not amplified
TCGA-49-4488-01	6.6762	9.0679	LUAD	I	869	1	NA	261	37	None	Not amplified
TCGA-49-4490-01	3.4978	6.848	LUAD	II	385	1	NA	63	18	None	Not amplified
TCGA-49-4494-01	6.1057	8.7417	LUAD	I	1081	1	NA	169	28	None	Not amplified
TCGA-49-4501-01	6.0327	7.9818	LUAD	I	1421	1	NA	68	19	None	Not amplified
TCGA-49-4505-01	6.553	9.1952	LUAD	I	428	1	NA	162	23	None	Not amplified
TCGA-49-4506-01	5.2783	10.3526	LUAD	I	999	1	NA	120	25	None	Not amplified
TCGA-49-4507-01	4.5322	10.6705	LUAD	IV	268	1	NA	183	27	None	Not amplified
TCGA-49-4510-01	4.9548	6.9828	LUAD	III	896	1	NA	48	33	None	Not amplified
TCGA-49-4512-01	4.2233	5.5345	LUAD	II	905	1	NA	42	11	None	Not amplified
TCGA-49-4514-01	3.3478	8.7819	LUAD	IV	1700	0	NA	275	49	None	Not amplified
TCGA-49-6742-01	4.4999	6.7797	LUAD	II	445	0	NA	253	49	None	Not amplified
TCGA-49-6743-01	7.1778	7.8856	LUAD	I	369	0	NA	NA	87	None	Not amplified
TCGA-49-6744-01	6.1239	9.4185	LUAD	I	890	0	NA	238	42	None	Not amplified
TCGA-49-6745-01	9.7282	9.4148	LUAD	I	522	0	NA	118	29	None	Not amplified
TCGA-49-6761-01	8.3896	9.035	LUAD	I	354	0	NA	158	NA	None	Not amplified
TCGA-49-6767-01	7.7093	9.3511	LUAD	I	677	0	NA	404	50	None	Not amplified
TCGA-49-AAQV-01	6.3978	7.8898	LUAD	I	677	1	NA	NA	NA	NA	Not amplified
TCGA-49-AAR0-01	4.8708	8.1094	LUAD	I	4415	0	NA	NA	NA	NA	Not amplified
TCGA-49-AAR2-01	4.0415	8.094	LUAD	IV	1945	0	NA	NA	NA	NA	Not amplified
TCGA-49-AAR3-01	8.6717	10.5799	LUAD	I	1893	0	NA	NA	NA	NA	Not amplified
TCGA-49-AAR4-01	6.8706	11.6511	LUAD	I	879	1	NA	NA	NA	NA	Not amplified
TCGA-49-AAR9-01	4.0534	7.2992	LUAD	IV	260	1	NA	NA	NA	NA	Not amplified
TCGA-49-AARE-01	4.1571	7.9365	LUAD	IV	1229	1	NA	NA	NA	NA	Not amplified
TCGA-49-AARN-01	6.0428	7.667	LUAD	I	1135	1	NA	NA	NA	NA	Not amplified
TCGA-49-AARO-01	6.6872	8.2409	LUAD	I	3755	0	NA	NA	NA	NA	Not amplified
TCGA-49-AARQ-01	4.8624	7.8816	LUAD	I	6443	0	NA	NA	NA	NA	Not amplified
TCGA-49-AARR-01	6.5759	8.5877	LUAD	I	4630	0	NA	NA	NA	NA	Not amplified
TCGA-4A-A93W-01	3.0908	6.1564	KIRP	II	NA	NA	NA	NA	NA	NA	Not amplified
TCGA-4A-A93X-01	3.5228	3.8634	KIRP	II	NA	NA	NA	NA	NA	NA	Not amplified
TCGA-4A-A93Y-01	6.0299	9.0478	KIRP	I	NA	NA	NA	NA	NA	NA	Not amplified
TCGA-4B-A93V-01	9.3718	7.1542	LUAD	I	254	0	NA	NA	NA	NA	Not amplified
TCGA-4C-A93U-01	7.4742	7.7021	THCA	I	129	0	NA	41	NA	NA	Not amplified
TCGA-4E-A92E-01	6.0169	8.5642	UCEC	I	NA	NA	MSS	NA	NA	NA	Not amplified
TCGA-4G-AAZO-01	3.6051	6.7017	CHOL	II	609	0	NA	238	NA	NA	Not amplified
TCGA-4G-AAZT-01	2.0137	6.5541	CHOL	II	206	0	NA	94	NA	NA	Not amplified
TCGA-4H-AAAK-01	4.2053	6.6942	BRCA	II	348	0	NA	NA	NA	NA	Not amplified
TCGA-4J-AA1J-01	4.4549	6.0145	CESC	II	377	0	NA	NA	NA	NA	Not amplified
TCGA-4K-AA1G-01	5.0332	6.6082	TGCT	III	107	0	NA	51	NA	NA	Not amplified
TCGA-4K-AA1H-01	7.3791	11.849	TGCT	I	213	0	NA	32	NA	NA	Not amplified
TCGA-4K-AA1I-01	7.4341	10.0938	TGCT	I	3	0	NA	34	NA	NA	Not amplified
TCGA-4K-AAAL-01	3.8788	9.043	TGCT	IV	147	0	NA	46	NA	NA	Not amplified
TCGA-4L-AA1F-01	4.2945	7.5487	PRAD	IV	350	0	NA	NA	NA	NA	Not amplified
TCGA-4N-A93T-01	2.284	5.4454	COAD	II	146	0	MSS	NA	NA	NA	Not amplified
TCGA-4P-AA8J-01	5.7712	7.2824	HNSC	I	102	0	NA	NA	NA	NA	Not amplified
TCGA-4R-AA8I-01	4.4333	5.4682	LIHC	II	262	1	NA	NA	NA	NA	Not amplified
TCGA-4T-AA8H-01	3.0551	4.6512	COAD	II	349	0	NA	NA	NA	NA	Not amplified
TCGA-4V-A9QI-01	6.8333	14.4492	THYM	I	2714	0	NA	10	NA	NA	Not amplified
TCGA-4V-A9QJ-01	6.618	12.8593	THYM	I	2702	0	NA	29	NA	NA	Not amplified
TCGA-4V-A9QL-01	5.4747	12.7544	THYM	I	1726	0	NA	25	NA	NA	Not amplified
TCGA-4V-A9QM-01	6.812	11.9042	THYM	I	1171	0	NA	13	NA	NA	Not amplified
TCGA-4V-A9QN-01	9.5617	8.2476	THYM	I	879	0	NA	15	NA	NA	Not amplified
TCGA-4V-A9QR-01	7.1105	12.0478	THYM	I	601	0	NA	41	NA	NA	Not amplified
TCGA-4V-A9QS-01	7.8411	13.287	THYM	I	596	0	NA	13	NA	NA	Not amplified
TCGA-4V-A9QT-01	5.4177	14.2905	THYM	I	660	0	NA	18	NA	NA	Not amplified
TCGA-4V-A9QU-01	4.5376	13.1886	THYM	IV	505	0	NA	25	NA	NA	Not amplified
TCGA-4V-A9QW-01	2.7333	13.2564	THYM	IV	428	0	NA	21	NA	NA	Not amplified
TCGA-4V-A9QX-01	4.164	13.7291	THYM	IV	342	0	NA	22	NA	NA	Not amplified
TCGA-4X-A9F9-01	6.125	13.8906	THYM	I	480	0	NA	18	NA	NA	Not amplified
TCGA-4X-A9FA-01	6.2277	10.514	THYM	I	392	0	NA	19	NA	NA	Not amplified
TCGA-4X-A9FB-01	8.2475	14.6771	THYM	I	717	0	NA	6	NA	NA	Not amplified
TCGA-4X-A9FC-01	4.7057	13.6762	THYM	IV	1626	0	NA	22	NA	NA	Not amplified
TCGA-4X-A9FD-01	9.3038	12.3056	THYM	I	1200	0	NA	31	NA	NA	Not amplified
TCGA-4Z-AA7M-01	3.5044	4.4394	BLCA	II	405	0	NA	NA	NA	NA	Not amplified
TCGA-4Z-AA7N-01	6.4064	9.2469	BLCA	I	1367	1	NA	NA	NA	NA	Not amplified
TCGA-4Z-AA7O-01	3.6212	8.0243	BLCA	IV	399	0	NA	NA	NA	NA	Not amplified
TCGA-4Z-AA7Q-01	7.1571	10.0068	BLCA	I	510	1	NA	NA	NA	NA	Not amplified
TCGA-4Z-AA7R-01	2.1891	5.4356	BLCA	II	522	1	NA	NA	NA	NA	Not amplified
TCGA-4Z-AA7S-01	2.593	3.2074	BLCA	II	1064	1	NA	NA	NA	NA	Not amplified
TCGA-4Z-AA7W-01	6.4187	10.8264	BLCA	I	840	0	NA	NA	NA	NA	Not amplified
TCGA-4Z-AA7Y-01	2.5965	3.472	BLCA	II	1494	0	NA	NA	NA	NA	Not amplified
TCGA-4Z-AA80-01	4.4478	6.3381	BLCA	II	19	1	NA	NA	NA	NA	Not amplified
TCGA-4Z-AA81-01	8.4434	9.1855	BLCA	I	1270	1	NA	NA	NA	NA	Not amplified
TCGA-4Z-AA82-01	4.8578	3.8829	BLCA	III	1556	1	NA	NA	NA	NA	Not amplified
TCGA-4Z-AA83-01	5.7319	4.8441	BLCA	III	1943	0	NA	NA	NA	NA	Not amplified
TCGA-4Z-AA84-01	6.9228	6.6658	BLCA	III	NA	NA	NA	NA	NA	NA	Not amplified
TCGA-4Z-AA86-01	7.4071	9.6531	BLCA	I	311	1	NA	NA	NA	NA	Not amplified
TCGA-4Z-AA87-01	7.2098	7.5911	BLCA	I	1454	0	NA	NA	NA	NA	Amplified
TCGA-4Z-AA89-01	3.5011	5.9758	BLCA	II	902	0	NA	NA	NA	NA	Not amplified
TCGA-50-5044-01	7.8536	8.9701	LUAD	I	624	1	NA	118	41	None	Not amplified
TCGA-50-5045-01	6.9154	9.481	LUAD	I	2174	1	NA	NA	47	None	Not amplified
TCGA-50-5049-01	7.0997	10.9426	LUAD	I	2146	0	NA	682	139	None	Not amplified
TCGA-50-5051-01	4.4019	7.1495	LUAD	IV	478	1	NA	107	23	None	Not amplified
TCGA-50-5055-01	5.0251	10.0987	LUAD	I	785	0	NA	20	5	None	Not amplified
TCGA-50-5066-01	6.4612	10.3138	LUAD	I	944	0	NA	NA	57	None	Not amplified
TCGA-50-5066-02	5.4527	8.078	LUAD	I	944	0	NA	NA	NA	None	NA
TCGA-50-5068-01	5.8222	9.7169	LUAD	I	1499	1	NA	86	12	None	Not amplified
TCGA-50-5072-01	5.5319	6.5162	LUAD	III	250	1	NA	156	NA	None	Not amplified
TCGA-50-5930-01	5.2039	9.1193	LUAD	I	282	1	NA	NA	94	None	Not amplified
TCGA-50-5931-01	2.9899	5.8216	LUAD	II	434	1	NA	273	26	None	Not amplified
TCGA-50-5932-01	4.5511	5.8251	LUAD	II	1235	1	NA	70	16	None	Not amplified
TCGA-50-5933-01	9.0321	7.5837	LUAD	I	2393	1	NA	468	67	None	Not amplified
TCGA-50-5935-01	5.5883	7.9981	LUAD	I	653	1	NA	102	18	None	Not amplified
TCGA-50-5936-01	5.083	6.5963	LUAD	III	257	1	NA	111	16	None	Not amplified
TCGA-50-5939-01	7.0028	6.0884	LUAD	III	460	1	NA	79	15	None	Not amplified
TCGA-50-5941-01	7.6556	10.0181	LUAD	I	567	0	NA	354	52	None	Not amplified
TCGA-50-5942-01	5.0429	8.0742	LUAD	I	883	0	NA	63	10	None	Not amplified
TCGA-50-5944-01	5.1103	6.5499	LUAD	III	764	0	NA	59	13	None	Not amplified
TCGA-50-5946-01	4.8888	6.8598	LUAD	III	686	0	NA	NA	63	None	Not amplified
TCGA-50-5946-02	5.4991	8.4179	LUAD	I	686	0	NA	NA	NA	None	NA
TCGA-50-6590-01	8.8981	9.2312	LUAD	I	1288	1	NA	NA	151	None	Not amplified
TCGA-50-6591-01	2.6727	1.9953	LUAD	II	119	1	NA	NA	16	None	Not amplified
TCGA-50-6592-01	6.4007	9.8472	LUAD	I	777	1	NA	NA	46	None	Not amplified
TCGA-50-6593-01	6.941	6.3544	LUAD	III	336	1	NA	265	32	None	Not amplified
TCGA-50-6594-01	10.6897	6.1865	LUAD	III	370	1	NA	NA	82	None	Not amplified
TCGA-50-6595-01	8.9916	8.169	LUAD	I	189	1	NA	104	33	None	Not amplified
TCGA-50-6597-01	3.2453	7.8037	LUAD	IV	1015	0	NA	54	13	None	Not amplified
TCGA-50-6673-01	4.8033	6.021	LUAD	III	22	1	NA	54	NA	None	Not amplified
TCGA-50-7109-01	4.6672	8.8716	LUAD	IV	255	0	NA	226	NA	None	Not amplified
TCGA-50-8457-01	5.7139	8.8824	LUAD	I	779	0	NA	NA	NA	None	Not amplified
TCGA-50-8459-01	5.2871	7.9849	LUAD	I	231	0	NA	NA	NA	None	Not amplified
TCGA-50-8460-01	5.7788	7.9626	LUAD	I	829	0	NA	NA	NA	None	Not amplified
TCGA-51-4079-01	8.0725	8.1253	LUSC	I	12	1	NA	330	50	None	Not amplified
TCGA-51-4080-01	6.2168	6.7055	LUSC	III	12	1	NA	245	40	None	Not amplified
TCGA-51-4081-01	6.0106	4.7989	LUSC	III	63	0	NA	175	31	None	Not amplified
TCGA-51-6867-01	9.2329	9.0976	LUSC	I	1856	1	NA	NA	NA	None	NA
TCGA-52-7622-01	9.6753	8.898	LUSC	I	862	0	NA	NA	NA	None	Not amplified
TCGA-52-7809-01	4.5724	7.5346	LUSC	IV	166	1	NA	NA	NA	None	Not amplified
TCGA-52-7810-01	5.0748	3.6767	LUSC	III	923	0	NA	NA	NA	None	Not amplified
TCGA-52-7811-01	6.1097	7.4104	LUSC	I	266	1	NA	NA	NA	None	Not amplified
TCGA-52-7812-01	8.7014	9.7713	LUSC	I	835	1	NA	NA	NA	None	Not amplified
TCGA-53-7624-01	7.1934	7.4323	LUAD	I	1043	1	NA	NA	NA	None	Not amplified
TCGA-53-7626-01	6.4974	9.651	LUAD	I	929	1	NA	327	NA	None	Not amplified
TCGA-53-7813-01	4.7929	9.2268	LUAD	I	424	0	NA	141	NA	None	Not amplified
TCGA-53-A4EZ-01	4.5977	7.3565	LUAD	IV	280	0	NA	NA	NA	None	Not amplified
TCGA-55-1592-01	5.9134	6.9209	LUAD	III	701	1	NA	500	67	None	Not amplified
TCGA-55-1594-01	6.2193	7.5941	LUAD	I	1178	0	NA	190	43	None	Not amplified
TCGA-55-1595-01	6.1034	8.4188	LUAD	I	1479	0	NA	NA	43	None	Not amplified
TCGA-55-1596-01	4.4411	7.5734	LUAD	IV	1375	0	NA	165	37	None	Not amplified
TCGA-55-5899-01	5.984	8.209	LUAD	I	87	0	NA	NA	48	None	Not amplified
TCGA-55-6543-01	6.8278	6.647	LUAD	III	2	0	NA	23	8	None	Not amplified
TCGA-55-6642-01	5.9375	8.8991	LUAD	I	993	0	NA	120	38	None	Not amplified
TCGA-55-6712-01	7.791	10.2819	LUAD	I	24	0	NA	131	35	None	Not amplified
TCGA-55-6968-01	6.9145	8.7796	LUAD	I	1293	1	NA	NA	NA	None	Not amplified
TCGA-55-6969-01	6.2712	9.1315	LUAD	I	1239	0	NA	NA	NA	None	Not amplified
TCGA-55-6970-01	6.7842	8.5305	LUAD	I	464	1	NA	161	NA	None	Not amplified
TCGA-55-6971-01	7.2296	10.3594	LUAD	I	25	0	NA	77	NA	None	Not amplified
TCGA-55-6972-01	2.7458	5.6789	LUAD	II	1475	0	NA	245	NA	None	Not amplified
TCGA-55-6975-01	3.4671	7.617	LUAD	IV	118	1	NA	NA	NA	None	Not amplified
TCGA-55-6978-01	9.4316	10.6161	LUAD	I	167	1	NA	36	NA	None	Not amplified
TCGA-55-6979-01	8.2778	9.8298	LUAD	I	237	1	NA	143	NA	None	Not amplified
TCGA-55-6980-01	6.3942	7.6306	LUAD	I	67	0	NA	17	NA	None	Not amplified
TCGA-55-6981-01	6.2057	5.3698	LUAD	III	1379	1	NA	59	NA	None	Not amplified
TCGA-55-6982-01	6.3435	7.4147	LUAD	I	995	1	NA	207	NA	None	Not amplified
TCGA-55-6983-01	5.025	8.9082	LUAD	I	1826	0	NA	106	NA	None	Not amplified
TCGA-55-6984-01	5.2312	6.4717	LUAD	III	760	1	NA	NA	NA	None	Not amplified
TCGA-55-6985-01	6.8194	8.7783	LUAD	I	1233	0	NA	411	NA	None	Not amplified
TCGA-55-6986-01	5.5921	7.3428	LUAD	I	3261	0	NA	22	NA	None	Not amplified
TCGA-55-6987-01	7.9345	10.7359	LUAD	I	1170	0	NA	NA	NA	None	Not amplified
TCGA-55-7227-01	7.2963	8.0979	LUAD	I	53	0	NA	NA	NA	None	NA
TCGA-55-7281-01	4.9098	8.4095	LUAD	I	18	0	NA	409	NA	None	Not amplified
TCGA-55-7283-01	5.5271	8.4172	LUAD	I	35	0	NA	210	NA	None	Not amplified
TCGA-55-7284-01	6.1835	8.0965	LUAD	I	121	0	NA	NA	NA	None	Not amplified
TCGA-55-7570-01	4.6668	8.1794	LUAD	IV	6	0	NA	NA	NA	None	Not amplified
TCGA-55-7573-01	5.493	7.9796	LUAD	I	4	0	NA	53	NA	None	Not amplified
TCGA-55-7574-01	5.6037	9.6388	LUAD	I	95	0	NA	248	NA	None	Not amplified
TCGA-55-7576-01	6.0392	8.4702	LUAD	I	40	0	NA	326	NA	None	Not amplified
TCGA-55-7724-01	5.9336	8.6359	LUAD	I	705	0	NA	239	NA	None	Not amplified
TCGA-55-7725-01	6.9284	8.6707	LUAD	I	39	0	NA	113	NA	None	Not amplified
TCGA-55-7726-01	5.0419	6.7479	LUAD	III	39	0	NA	110	NA	None	Not amplified
TCGA-55-7727-01	6.2171	8.319	LUAD	I	34	0	NA	222	NA	None	Not amplified
TCGA-55-7728-01	6.3532	8.2088	LUAD	I	24	0	NA	95	NA	None	Not amplified
TCGA-55-7815-01	6.9098	7.5953	LUAD	I	54	0	NA	127	NA	None	Not amplified
TCGA-55-7903-01	7.685	8.7632	LUAD	I	19	0	NA	135	NA	None	Not amplified
TCGA-55-7907-01	5.7384	8.6764	LUAD	I	16	0	NA	950	NA	None	Not amplified
TCGA-55-7910-01	4.9369	5.6724	LUAD	III	197	0	NA	NA	NA	None	Not amplified
TCGA-55-7911-01	7.8547	9.9155	LUAD	I	21	0	NA	195	NA	None	Not amplified
TCGA-55-7913-01	3.8567	6.7592	LUAD	II	NA	NA	NA	NA	NA	None	Not amplified
TCGA-55-7914-01	6.3212	8.8211	LUAD	I	3	0	NA	147	NA	None	Not amplified
TCGA-55-7994-01	9.6723	9.7072	LUAD	I	603	0	NA	NA	NA	None	Not amplified
TCGA-55-7995-01	7.3116	10.0194	LUAD	I	5	0	NA	NA	NA	None	Not amplified
TCGA-55-8085-01	5.5946	9.2834	LUAD	I	904	0	NA	NA	NA	None	Not amplified
TCGA-55-8087-01	4.0624	5.4799	LUAD	II	462	0	NA	NA	NA	None	Not amplified
TCGA-55-8089-01	7.9199	10.5624	LUAD	I	100	0	NA	NA	NA	None	Not amplified
TCGA-55-8090-01	7.9441	6.7361	LUAD	III	598	1	NA	NA	NA	None	Not amplified
TCGA-55-8091-01	8.0089	7.1038	LUAD	I	600	0	NA	NA	NA	None	Not amplified
TCGA-55-8092-01	6.4771	10.1065	LUAD	I	154	1	NA	NA	NA	None	Not amplified
TCGA-55-8094-01	3.2241	5.3761	LUAD	II	4	0	NA	NA	NA	None	Not amplified
TCGA-55-8096-01	5.2986	7.565	LUAD	I	719	1	NA	NA	NA	None	Not amplified
TCGA-55-8097-01	4.8188	6.9669	LUAD	III	476	0	NA	NA	NA	None	Not amplified
TCGA-55-8203-01	6.0988	8.7978	LUAD	I	547	0	NA	NA	NA	None	Not amplified
TCGA-55-8204-01	6.6241	7.993	LUAD	I	NA	NA	NA	NA	NA	None	Not amplified
TCGA-55-8205-01	9.5738	10.1244	LUAD	I	33	0	NA	NA	NA	None	Not amplified
TCGA-55-8206-01	5.8056	6.351	LUAD	III	46	0	NA	NA	NA	None	Not amplified
TCGA-55-8207-01	5.9378	7.9521	LUAD	I	66	0	NA	NA	NA	None	Not amplified
TCGA-55-8208-01	8.1892	9.5071	LUAD	I	674	0	NA	NA	NA	None	Not amplified
TCGA-55-8299-01	7.3726	10.4172	LUAD	I	469	1	NA	NA	NA	None	Not amplified
TCGA-55-8301-01	8.2932	9.4844	LUAD	I	44	0	NA	NA	NA	None	Not amplified
TCGA-55-8302-01	9.0066	8.1994	LUAD	I	23	0	NA	NA	NA	None	Not amplified
TCGA-55-8505-01	3.9205	5.4009	LUAD	II	29	0	NA	NA	NA	None	Not amplified
TCGA-55-8506-01	6.235	7.5058	LUAD	I	11	0	NA	NA	NA	None	Not amplified
TCGA-55-8507-01	4.9431	6.9648	LUAD	III	8	0	NA	NA	NA	None	Not amplified
TCGA-55-8508-01	5.1846	7.3073	LUAD	I	15	0	NA	NA	NA	None	Not amplified
TCGA-55-8510-01	7.1597	9.2203	LUAD	I	539	0	NA	NA	NA	None	Not amplified
TCGA-55-8511-01	8.4893	8.8618	LUAD	I	9	0	NA	NA	NA	None	Not amplified
TCGA-55-8512-01	5.3976	7.1723	LUAD	I	3	0	NA	NA	NA	None	Not amplified
TCGA-55-8513-01	6.5158	6.867	LUAD	III	146	0	NA	NA	NA	None	Not amplified
TCGA-55-8514-01	5.7864	5.8362	LUAD	III	202	0	NA	NA	NA	None	Not amplified
TCGA-55-8614-01	5.0742	7.7422	LUAD	I	536	0	NA	NA	NA	None	Not amplified
TCGA-55-8615-01	3.7902	4.5846	LUAD	II	15	0	NA	NA	NA	None	Not amplified
TCGA-55-8616-01	6.392	7.648	LUAD	I	48	0	NA	NA	NA	None	Not amplified
TCGA-55-8619-01	6.0367	9.0462	LUAD	I	49	0	NA	NA	NA	None	Not amplified
TCGA-55-8620-01	5.8014	8.6605	LUAD	I	66	0	NA	NA	NA	None	Not amplified
TCGA-55-8621-01	7.8705	8.517	LUAD	I	515	0	NA	NA	NA	None	Not amplified
TCGA-55-A48X-01	6.1174	8.5985	LUAD	I	689	0	NA	NA	NA	None	Not amplified
TCGA-55-A48Y-01	4.5272	7.0817	LUAD	IV	630	0	NA	NA	NA	NA	Not amplified
TCGA-55-A48Z-01	6.6228	8.1717	LUAD	I	651	0	NA	NA	NA	None	Not amplified
TCGA-55-A491-01	6.5733	7.7473	LUAD	I	626	0	NA	NA	NA	None	Not amplified
TCGA-55-A492-01	1.0505	6.2272	LUAD	II	596	0	NA	NA	NA	None	Not amplified
TCGA-55-A493-01	8.8056	8.8862	LUAD	I	28	0	NA	NA	NA	None	Not amplified
TCGA-55-A494-01	3.2366	4.8768	LUAD	II	481	0	NA	NA	NA	None	Not amplified
TCGA-55-A4DF-01	7.5775	8.8928	LUAD	I	614	1	NA	NA	NA	None	Amplified
TCGA-55-A4DG-01	4.9814	8.7333	LUAD	I	608	0	NA	NA	NA	None	Not amplified
TCGA-55-A57B-01	6.0799	6.4896	LUAD	III	546	0	NA	NA	NA	NA	Not amplified
TCGA-56-1622-01	9.6063	5.6988	LUSC	III	881	1	NA	176	27	None	Not amplified
TCGA-56-5897-01	5.7123	8.5499	LUSC	I	3	0	NA	96	22	None	Not amplified
TCGA-56-5898-01	5.4403	7.0749	LUSC	I	555	0	NA	131	25	None	Not amplified
TCGA-56-6545-01	7.3524	7.852	LUSC	I	62	0	NA	257	55	None	Not amplified
TCGA-56-6546-01	6.2178	9.7892	LUSC	I	19	1	NA	280	51	None	Not amplified
TCGA-56-7221-01	3.9208	5.3975	LUSC	II	30	0	NA	NA	NA	None	Not amplified
TCGA-56-7222-01	3.9709	3.565	LUSC	II	13	0	NA	NA	NA	None	Not amplified
TCGA-56-7223-01	4.1187	5.1916	LUSC	II	30	0	NA	NA	NA	None	Not amplified
TCGA-56-7579-01	3.5831	4.1807	LUSC	II	44	0	NA	NA	NA	None	Not amplified
TCGA-56-7580-01	3.804	6.9519	LUSC	II	40	0	NA	NA	NA	None	Not amplified
TCGA-56-7582-01	6.0464	7.5704	LUSC	I	26	0	NA	NA	NA	None	Not amplified
TCGA-56-7730-01	6.9129	5.5724	LUSC	III	198	1	NA	NA	NA	None	Not amplified
TCGA-56-7731-01	6.0469	7.3994	LUSC	I	3	1	NA	NA	NA	None	Not amplified
TCGA-56-7822-01	4.9204	6.1779	LUSC	III	532	1	NA	NA	NA	None	Not amplified
TCGA-56-7823-01	5.6459	6.1501	LUSC	III	NA	NA	NA	NA	NA	None	Not amplified
TCGA-56-8082-01	5.9391	4.5437	LUSC	III	NA	NA	NA	NA	NA	None	Not amplified
TCGA-56-8083-01	2.4961	6.7377	LUSC	II	NA	NA	NA	NA	NA	None	Not amplified
TCGA-56-8201-01	7.5367	9.8947	LUSC	I	NA	NA	NA	NA	NA	None	Not amplified
TCGA-56-8304-01	6.4747	7.4711	LUSC	I	106	0	NA	NA	NA	None	Not amplified
TCGA-56-8305-01	4.0482	5.1374	LUSC	II	NA	NA	NA	NA	NA	None	Not amplified
TCGA-56-8307-01	8.0517	7.616	LUSC	I	818	0	NA	NA	NA	None	Not amplified
TCGA-56-8308-01	8.1084	7.1285	LUSC	I	517	0	NA	NA	NA	None	Not amplified
TCGA-56-8309-01	8.1408	9.9157	LUSC	I	428	0	NA	NA	NA	None	Not amplified
TCGA-56-8503-01	6.3167	7.9051	LUSC	I	41	0	NA	NA	NA	None	Not amplified
TCGA-56-8504-01	5.3918	8.3233	LUSC	I	510	0	NA	NA	NA	None	Not amplified
TCGA-56-8622-01	6.4395	4.8956	LUSC	III	55	0	NA	NA	NA	None	Not amplified
TCGA-56-8623-01	7.5846	8.9293	LUSC	I	692	1	NA	NA	NA	NA	Not amplified
TCGA-56-8624-01	3.9118	6.8549	LUSC	II	36	0	NA	NA	NA	None	Not amplified
TCGA-56-8625-01	7.5617	9.5819	LUSC	I	315	1	NA	NA	NA	None	Not amplified
TCGA-56-8626-01	4.422	6.2504	LUSC	II	302	1	NA	NA	NA	None	Not amplified
TCGA-56-8628-01	5.6202	8.2547	LUSC	I	616	0	NA	NA	NA	None	Not amplified
TCGA-56-8629-01	4.2671	7.3859	LUSC	IV	481	0	NA	NA	NA	None	Not amplified
TCGA-56-A49D-01	6.6611	9.1322	LUSC	I	637	0	NA	NA	NA	None	Not amplified
TCGA-56-A4BW-01	5.0637	7.9497	LUSC	I	585	0	NA	NA	NA	None	Not amplified
TCGA-56-A4BX-01	5.7113	6.4944	LUSC	III	405	0	NA	NA	NA	None	Not amplified
TCGA-56-A4BY-01	7.4307	7.9756	LUSC	I	543	1	NA	NA	NA	None	Not amplified
TCGA-56-A4ZJ-01	5.6869	7.2275	LUSC	I	640	0	NA	NA	NA	None	Not amplified
TCGA-56-A4ZK-01	8.6234	8.0831	LUSC	I	570	0	NA	NA	NA	None	Not amplified
TCGA-56-A5DR-01	5.3719	7.2852	LUSC	I	4	0	NA	NA	NA	None	Not amplified
TCGA-56-A5DS-01	4.6731	7.6117	LUSC	IV	8	0	NA	NA	NA	None	Not amplified
TCGA-56-A62T-01	5.0739	5.2281	LUSC	III	84	0	NA	NA	NA	NA	Not amplified
TCGA-57-1582-01	2.5617	6.1721	OV	II	731	1	NA	44	NA	None	Not amplified
TCGA-57-1583-01	4.1112	4.397	OV	II	346	1	NA	8	NA	None	Not amplified
TCGA-57-1584-01	3.8114	6.0861	OV	II	643	0	NA	24	NA	None	Not amplified
TCGA-57-1993-01	4.9524	4.1492	OV	III	763	0	NA	NA	10	None	Not amplified
TCGA-57-1994-01	5.0182	8.9921	OV	I	761	0	NA	NA	NA	None	Not amplified
TCGA-58-8386-01	6.8078	7.0678	LUSC	I	1	1	NA	NA	NA	None	Not amplified
TCGA-58-8387-01	9.5292	8.9474	LUSC	I	403	1	NA	NA	NA	None	Amplified
TCGA-58-8388-01	5.7172	8.6984	LUSC	I	412	1	NA	NA	NA	None	Not amplified
TCGA-58-8390-01	5.2859	7.0193	LUSC	I	911	0	NA	NA	NA	None	Not amplified
TCGA-58-8391-01	7.6256	6.6846	LUSC	III	2167	0	NA	NA	NA	None	Not amplified
TCGA-58-8392-01	7.267	5.8995	LUSC	III	501	1	NA	NA	NA	None	Not amplified
TCGA-58-8393-01	8.1354	9.4769	LUSC	I	1058	0	NA	NA	NA	None	Not amplified
TCGA-58-A46J-01	5.5447	7.3788	LUSC	I	2589	0	NA	NA	NA	None	Not amplified
TCGA-58-A46K-01	9.4317	8.0945	LUSC	I	1045	1	NA	NA	NA	None	Not amplified
TCGA-58-A46L-01	6.4707	8.838	LUSC	I	1723	0	NA	NA	NA	None	Not amplified
TCGA-58-A46M-01	9.0857	9.0213	LUSC	I	1072	0	NA	NA	NA	None	Not amplified
TCGA-58-A46N-01	8.2823	6.1992	LUSC	III	910	0	NA	NA	NA	None	Not amplified
TCGA-59-2348-01	4.0936	6.4089	OV	II	5481	0	NA	NA	6	None	Not amplified
TCGA-59-2350-01	5.3687	6.0677	OV	III	679	1	NA	NA	5	None	Not amplified
TCGA-59-2351-01	4.84	7.363	OV	I	3532	0	NA	NA	12	None	Not amplified
TCGA-59-2352-01	6.3182	7.0426	OV	I	286	1	NA	NA	11	None	Not amplified
TCGA-59-2355-01	5.0271	7.5963	OV	I	65	1	NA	NA	3	None	Not amplified
TCGA-59-2363-01	2.3255	5.2311	OV	II	165	0	NA	NA	12	None	Not amplified
TCGA-5B-A90C-01	3.8681	5.3526	UCEC	II	1116	0	MSS	NA	NA	NA	Not amplified
TCGA-5C-A9VG-01	2.8191	4.5252	LIHC	II	328	0	NA	NA	NA	NA	Not amplified
TCGA-5C-A9VH-01	1.6184	5.6831	LIHC	II	322	0	NA	NA	NA	NA	Not amplified
TCGA-5C-AAPD-01	4.981	8.818	LIHC	I	20	0	NA	NA	NA	NA	Not amplified
TCGA-5G-A9ZZ-01	7.6669	9.619	THYM	I	593	0	NA	11	NA	NA	Not amplified
TCGA-5K-AAAP-01	5.367	12.1214	THYM	I	1054	0	NA	26	NA	NA	Not amplified
TCGA-5L-AAT0-01	3.2036	8.5851	BRCA	IV	NA	NA	NA	NA	NA	NA	Not amplified
TCGA-5L-AAT1-01	5.1717	10.0394	BRCA	I	NA	NA	NA	NA	NA	NA	Not amplified
TCGA-5M-AAT4-01	3.1285	5.7297	COAD	II	NA	NA	MSS	NA	NA	NA	Not amplified
TCGA-5M-AAT5-01	4.3427	4.6289	COAD	II	NA	NA	MSI-L	NA	NA	NA	Not amplified
TCGA-5M-AAT6-01	6.7719	8.6319	COAD	I	NA	NA	MSI-H	NA	NA	NA	Not amplified
TCGA-5M-AATA-01	3.4516	6.6554	COAD	II	NA	NA	MSS	NA	NA	NA	Not amplified
TCGA-5M-AATE-01	2.8436	5.596	COAD	II	NA	NA	MSS	NA	NA	NA	Not amplified
TCGA-5N-A9KI-01	4.2332	5.6335	BLCA	II	NA	NA	NA	NA	NA	NA	Not amplified
TCGA-5N-A9KM-01	1.777	7.9117	BLCA	IV	NA	NA	NA	NA	NA	NA	Not amplified
TCGA-5P-A9JU-01	4.464	3.1865	KIRP	II	NA	NA	NA	NA	NA	NA	Not amplified
TCGA-5P-A9JV-01	4.2628	7.1996	KIRP	IV	NA	NA	NA	NA	NA	NA	Not amplified
TCGA-5P-A9JW-01	7.3748	7.206	KIRP	I	NA	NA	NA	NA	NA	NA	Not amplified
TCGA-5P-A9JY-01	2.9872	6.6732	KIRP	II	NA	NA	NA	NA	NA	NA	Not amplified
TCGA-5P-A9JZ-01	5.4156	5.6711	KIRP	III	NA	NA	NA	NA	NA	NA	Not amplified
TCGA-5P-A9K0-01	4.3228	6.2599	KIRP	II	NA	NA	NA	NA	NA	NA	Not amplified
TCGA-5P-A9K2-01	4.7762	5.1781	KIRP	III	NA	NA	NA	NA	NA	NA	Not amplified
TCGA-5P-A9K3-01	5.8004	6.5623	KIRP	III	NA	NA	NA	NA	NA	NA	Not amplified
TCGA-5P-A9K4-01	2.8431	3.9751	KIRP	II	NA	NA	NA	NA	NA	NA	Not amplified
TCGA-5P-A9K6-01	4.9954	6.8993	KIRP	III	NA	NA	NA	NA	NA	NA	Not amplified
TCGA-5P-A9K8-01	7.8718	4.4573	KIRP	III	NA	NA	NA	NA	NA	NA	Not amplified
TCGA-5P-A9K9-01	4.0931	5.334	KIRP	II	NA	NA	NA	NA	NA	NA	Not amplified
TCGA-5P-A9KA-01	4.8029	7.7499	KIRP	I	NA	NA	NA	NA	NA	NA	Not amplified
TCGA-5P-A9KC-01	3.4499	4.7295	KIRP	II	NA	NA	NA	NA	NA	NA	Not amplified
TCGA-5P-A9KE-01	5.7841	6.3682	KIRP	III	NA	NA	NA	NA	NA	NA	Not amplified
TCGA-5P-A9KF-01	2.5945	6.161	KIRP	II	NA	NA	NA	NA	NA	NA	NA
TCGA-5P-A9KH-01	8.2969	4.9516	KIRP	III	NA	NA	NA	NA	NA	NA	Not amplified
TCGA-5R-AA1C-01	3.3518	6.9958	LIHC	II	364	0	NA	NA	NA	NA	Not amplified
TCGA-5R-AA1D-01	3.5918	7.0553	LIHC	IV	337	0	NA	NA	NA	NA	Not amplified
TCGA-5R-AAAM-01	4.3238	7.3429	LIHC	IV	46	1	NA	NA	NA	NA	Not amplified
TCGA-5S-A9Q8-01	4.0436	5.8094	UCEC	II	313	0	MSS	NA	NA	NA	Not amplified
TCGA-5T-A9QA-01	2.8632	6.9653	BRCA	II	303	0	NA	NA	NA	NA	Not amplified
TCGA-5U-AB0D-01	2.9366	9.1014	THYM	IV	352	0	NA	79	NA	NA	Not amplified
TCGA-5U-AB0E-01	7.2943	11.6912	THYM	I	315	0	NA	26	NA	NA	Not amplified
TCGA-5U-AB0F-01	5.6905	12.5633	THYM	I	81	0	NA	20	NA	NA	Not amplified
TCGA-5V-A9RR-01	4.6886	11.5649	THYM	IV	827	0	NA	15	NA	NA	Not amplified
TCGA-60-2695-01	6.0693	9.0369	LUSC	I	642	0	NA	NA	NA	None	Not amplified
TCGA-60-2696-01	5.6662	8.8013	LUSC	I	109	1	NA	NA	NA	None	Not amplified
TCGA-60-2697-01	6.6038	9.6688	LUSC	I	372	1	NA	NA	NA	None	Not amplified
TCGA-60-2698-01	6.6214	9.6749	LUSC	I	311	1	NA	1055	249	None	Not amplified
TCGA-60-2703-01	4.9196	6.0277	LUSC	III	2945	1	NA	NA	NA	None	Not amplified
TCGA-60-2704-01	7.2245	8.954	LUSC	I	1154	1	NA	NA	NA	None	Not amplified
TCGA-60-2706-01	5.8428	8.8909	LUSC	I	2500	0	NA	NA	NA	None	Not amplified
TCGA-60-2707-01	5.9222	6.9705	LUSC	III	661	0	NA	110	29	None	Not amplified
TCGA-60-2708-01	7.4683	5.4163	LUSC	III	2447	0	NA	176	34	None	Not amplified
TCGA-60-2709-01	8.7829	9.6994	LUSC	I	1505	0	NA	159	31	None	Not amplified
TCGA-60-2710-01	6.5121	8.6493	LUSC	I	1714	0	NA	177	NA	None	Not amplified
TCGA-60-2711-01	4.6763	8.742	LUSC	IV	1014	0	NA	102	26	None	Not amplified
TCGA-60-2712-01	7.6849	9.692	LUSC	I	274	1	NA	77	15	None	Not amplified
TCGA-60-2713-01	7.0069	8.917	LUSC	I	1580	0	NA	213	40	None	Not amplified
TCGA-60-2714-01	8.8932	8.6034	LUSC	I	512	0	NA	NA	NA	None	Not amplified
TCGA-60-2715-01	6.368	8.2733	LUSC	I	1075	1	NA	144	26	None	Not amplified
TCGA-60-2716-01	4.6916	4.9392	LUSC	II	1356	0	NA	NA	NA	None	Not amplified
TCGA-60-2719-01	5.2933	7.6103	LUSC	I	932	0	NA	167	27	None	Not amplified
TCGA-60-2720-01	4.1347	8.5135	LUSC	IV	97	0	NA	361	51	None	Not amplified
TCGA-60-2721-01	5.9642	9.9662	LUSC	I	983	0	NA	66	8	None	Not amplified
TCGA-60-2722-01	8.3712	6.5777	LUSC	III	908	0	NA	279	37	None	Not amplified
TCGA-60-2723-01	10.0863	9.3494	LUSC	I	693	0	NA	240	21	None	Amplified
TCGA-60-2724-01	4.7507	5.2029	LUSC	II	717	0	NA	269	58	None	Not amplified
TCGA-60-2725-01	8.116	9.7977	LUSC	I	816	0	NA	136	25	None	Not amplified
TCGA-60-2726-01	4.1285	8.5051	LUSC	IV	358	1	NA	239	55	None	Not amplified
TCGA-61-1721-01	4.0709	7.1062	OV	IV	338	0	NA	NA	NA	None	Not amplified
TCGA-61-1724-01	4.6882	6.2416	OV	II	637	1	NA	NA	NA	None	Not amplified
TCGA-61-1725-01	4.2436	7.0723	OV	IV	956	0	NA	NA	NA	None	Not amplified
TCGA-61-1728-01	2.7046	5.7018	OV	II	848	0	NA	NA	2	None	Not amplified
TCGA-61-1733-01	3.3362	6.9828	OV	II	967	0	NA	NA	NA	None	Not amplified
TCGA-61-1736-01	5.0932	6.4256	OV	III	1484	1	NA	NA	3	None	Not amplified
TCGA-61-1738-01	4.3916	6.515	OV	II	1089	1	NA	NA	NA	None	Not amplified
TCGA-61-1740-01	5.9047	8.3363	OV	I	74	1	NA	NA	NA	None	Not amplified
TCGA-61-1741-01	5.2489	6.7914	OV	III	1024	1	NA	NA	NA	None	Not amplified
TCGA-61-1743-01	5.4934	4.5953	OV	III	1329	1	NA	NA	NA	None	Not amplified
TCGA-61-1900-01	2.9551	5.9057	OV	II	176	0	NA	NA	NA	None	Not amplified
TCGA-61-1907-01	5.2347	8.8959	OV	I	952	0	NA	NA	NA	None	Not amplified
TCGA-61-1910-01	3.656	3.8619	OV	II	1127	0	NA	NA	NA	None	Not amplified
TCGA-61-1914-01	2.8881	6.2009	OV	II	1722	0	NA	NA	NA	None	Not amplified
TCGA-61-1917-01	4.4273	7.8161	OV	IV	1321	1	NA	NA	NA	None	Not amplified
TCGA-61-1918-01	4.669	6.178	OV	II	479	1	NA	NA	NA	None	Not amplified
TCGA-61-1919-01	4.6738	6.8533	OV	II	1161	1	NA	NA	11	None	Not amplified
TCGA-61-1995-01	4.7128	6.9437	OV	II	61	0	NA	NA	7	None	Not amplified
TCGA-61-1998-01	4.0823	3.9397	OV	II	168	0	NA	NA	24	None	Not amplified
TCGA-61-2000-01	4.1235	5.8316	OV	II	441	0	NA	NA	10	None	Not amplified
TCGA-61-2008-01	3.4307	6.8821	OV	II	932	0	NA	NA	6	None	Not amplified
TCGA-61-2008-02	6.3131	9.301	OV	I	932	0	NA	NA	NA	None	NA
TCGA-61-2009-01	2.7964	7.9139	OV	IV	1212	0	NA	NA	10	None	Not amplified
TCGA-61-2012-01	5.6718	8.8661	OV	I	932	0	NA	NA	21	None	Not amplified
TCGA-61-2016-01	3.8168	7.4787	OV	IV	36	1	NA	NA	2	None	Not amplified
TCGA-61-2088-01	2.0404	4.8847	OV	II	145	0	NA	NA	1	None	Not amplified
TCGA-61-2092-01	1.7261	3.1454	OV	II	1573	0	NA	NA	9	None	Not amplified
TCGA-61-2094-01	7.2799	10.6372	OV	I	2182	0	NA	NA	6	None	Amplified
TCGA-61-2097-01	3.8024	3.1563	OV	II	1844	0	NA	NA	12	None	Not amplified
TCGA-61-2098-01	2.2122	4.174	OV	II	1993	0	NA	NA	NA	None	Not amplified
TCGA-61-2102-01	2.5356	5.9443	OV	II	197	1	NA	NA	4	None	Not amplified
TCGA-61-2104-01	6.2654	6.6334	OV	III	2338	0	NA	NA	8	None	Not amplified
TCGA-61-2109-01	3.6915	5.5622	OV	II	629	1	NA	NA	16	None	Not amplified
TCGA-61-2110-01	3.6362	4.2194	OV	II	1354	1	NA	NA	10	None	Not amplified
TCGA-61-2111-01	4.0541	6.7771	OV	II	3825	0	NA	NA	11	None	Not amplified
TCGA-61-2113-01	6.2101	6.8268	OV	III	676	1	NA	NA	13	None	Not amplified
TCGA-62-8394-01	5.2002	6.6672	LUAD	III	139	1	NA	NA	NA	None	Not amplified
TCGA-62-8395-01	3.471	6.9314	LUAD	II	1216	0	NA	NA	NA	None	Not amplified
TCGA-62-8397-01	5.1117	5.6621	LUAD	III	1289	0	NA	NA	NA	None	Not amplified
TCGA-62-8398-01	6.4545	7.3698	LUAD	I	444	1	NA	NA	NA	None	Not amplified
TCGA-62-8399-01	6.4279	7.8585	LUAD	I	2696	0	NA	NA	NA	None	Not amplified
TCGA-62-8402-01	7.4787	9.1259	LUAD	I	1498	1	NA	NA	NA	None	Not amplified
TCGA-62-A46O-01	4.0538	5.6129	LUAD	II	1454	1	NA	NA	NA	None	Not amplified
TCGA-62-A46P-01	3.7038	6.5923	LUAD	II	594	1	NA	NA	NA	None	Not amplified
TCGA-62-A46R-01	5.7149	8.5005	LUAD	I	1725	1	NA	NA	NA	None	Not amplified
TCGA-62-A46S-01	5.4391	7.4544	LUAD	I	1653	1	NA	NA	NA	None	Not amplified
TCGA-62-A46U-01	8.8211	9.0884	LUAD	I	2067	0	NA	NA	NA	None	Not amplified
TCGA-62-A46V-01	4.3821	4.2377	LUAD	II	2199	0	NA	NA	NA	None	Not amplified
TCGA-62-A46Y-01	7.4834	8.7866	LUAD	I	414	1	NA	NA	NA	None	Not amplified
TCGA-62-A470-01	4.8122	6.0503	LUAD	III	1194	1	NA	NA	NA	None	Not amplified
TCGA-62-A471-01	4.555	7.8271	LUAD	IV	1246	0	NA	NA	NA	None	Not amplified
TCGA-62-A472-01	7.3502	8.9349	LUAD	I	910	0	NA	NA	NA	None	Not amplified
TCGA-63-5128-01	6.4706	5.6531	LUSC	III	NA	NA	NA	267	40	None	Not amplified
TCGA-63-5131-01	4.9069	6.5049	LUSC	III	NA	NA	NA	248	41	None	Not amplified
TCGA-63-6202-01	8.5756	10.2783	LUSC	I	NA	NA	NA	300	39	None	Not amplified
TCGA-63-7020-01	5.9322	8.6289	LUSC	I	NA	NA	NA	NA	NA	None	Not amplified
TCGA-63-7021-01	7.8968	7.9142	LUSC	I	NA	NA	NA	NA	NA	None	Not amplified
TCGA-63-7022-01	5.4717	8.0664	LUSC	I	NA	NA	NA	NA	NA	None	Not amplified
TCGA-63-7023-01	4.3853	8.0874	LUSC	IV	NA	NA	NA	NA	NA	None	Not amplified
TCGA-63-A5M9-01	8.6976	7.582	LUSC	I	NA	NA	NA	NA	NA	None	Not amplified
TCGA-63-A5MB-01	6.5057	7.8802	LUSC	I	3123	0	NA	NA	NA	None	Not amplified
TCGA-63-A5MG-01	5.4465	7.2575	LUSC	I	2148	0	NA	NA	NA	None	Not amplified
TCGA-63-A5MH-01	7.7813	6.832	LUSC	III	2026	0	NA	NA	NA	None	Not amplified
TCGA-63-A5MI-01	4.0744	6.1924	LUSC	II	1784	0	NA	NA	NA	None	Not amplified
TCGA-63-A5MJ-01	8.8745	7.3957	LUSC	I	1824	0	NA	NA	NA	None	Not amplified
TCGA-63-A5ML-01	8.4271	8.3419	LUSC	I	1386	0	NA	NA	NA	None	Not amplified
TCGA-63-A5MM-01	9.3305	8.9771	LUSC	I	456	1	NA	NA	NA	None	Not amplified
TCGA-63-A5MN-01	9.4502	10.1428	LUSC	I	345	1	NA	NA	NA	None	Not amplified
TCGA-63-A5MP-01	10.4543	8.5334	LUSC	I	769	0	NA	NA	NA	None	Not amplified
TCGA-63-A5MR-01	7.4958	6.065	LUSC	III	2716	0	NA	NA	NA	None	Not amplified
TCGA-63-A5MS-01	6.4717	8.4398	LUSC	I	2381	0	NA	NA	NA	None	Not amplified
TCGA-63-A5MT-01	5.3085	5.6232	LUSC	III	498	0	NA	NA	NA	None	Not amplified
TCGA-63-A5MU-01	6.3055	5.1043	LUSC	III	773	1	NA	NA	NA	None	Not amplified
TCGA-63-A5MV-01	8.7442	8.2834	LUSC	I	1100	0	NA	NA	NA	None	Not amplified
TCGA-63-A5MW-01	3.495	7.6505	LUSC	IV	1639	0	NA	NA	NA	None	Not amplified
TCGA-63-A5MY-01	6.5278	5.6064	LUSC	III	1052	0	NA	NA	NA	None	Not amplified
TCGA-64-1676-01	7.9603	8.7868	LUAD	I	1728	0	NA	495	56	None	Amplified
TCGA-64-1677-01	6.8009	8.4603	LUAD	I	628	1	NA	216	35	None	Not amplified
TCGA-64-1678-01	3.0862	7.3736	LUAD	IV	1189	0	NA	504	24	None	Not amplified
TCGA-64-1679-01	6.664	5.1273	LUAD	III	1686	0	NA	433	NA	None	Not amplified
TCGA-64-1680-01	4.8406	6.7127	LUAD	III	1126	0	NA	77	9	None	Not amplified
TCGA-64-1681-01	5.1431	5.9811	LUAD	III	1167	1	NA	79	NA	None	Not amplified
TCGA-64-5774-01	5.3985	6.8882	LUAD	III	2550	0	NA	124	15	None	Not amplified
TCGA-64-5775-01	9.218	5.9055	LUAD	III	62	1	NA	397	NA	None	Not amplified
TCGA-64-5778-01	6.8797	10.7756	LUAD	I	926	0	NA	410	73	None	Not amplified
TCGA-64-5779-01	5.1774	8.6598	LUAD	I	507	0	NA	NA	49	None	Not amplified
TCGA-64-5781-01	6.1776	10.4882	LUAD	I	1202	0	NA	936	144	None	Not amplified
TCGA-64-5815-01	6.2105	7.1617	LUAD	I	224	0	NA	NA	21	None	Not amplified
TCGA-66-2727-01	9.5669	7.6211	LUSC	I	516	1	NA	198	29	None	Not amplified
TCGA-66-2734-01	6.0114	5.7757	LUSC	III	1311	0	NA	253	57	None	Not amplified
TCGA-66-2737-01	7.3211	8.3421	LUSC	I	61	0	NA	NA	NA	None	Not amplified
TCGA-66-2742-01	5.4066	7.2796	LUSC	I	641	0	NA	189	25	None	Not amplified
TCGA-66-2744-01	8.696	9.637	LUSC	I	30	0	NA	225	48	None	Amplified
TCGA-66-2753-01	5.277	6.8913	LUSC	III	31	0	NA	NA	NA	None	Not amplified
TCGA-66-2754-01	4.0398	6.3553	LUSC	II	61	0	NA	262	47	None	Not amplified
TCGA-66-2755-01	9.7697	8.432	LUSC	I	28	0	NA	171	22	None	Not amplified
TCGA-66-2756-01	4.3512	7.8865	LUSC	IV	30	0	NA	426	96	None	Not amplified
TCGA-66-2757-01	5.801	8.6123	LUSC	I	1338	1	NA	212	44	None	Not amplified
TCGA-66-2758-01	8.7926	10.2454	LUSC	I	639	0	NA	287	63	None	Not amplified
TCGA-66-2759-01	9.9496	8.1207	LUSC	I	762	0	NA	371	58	None	Amplified
TCGA-66-2763-01	8.3853	7.2247	LUSC	I	30	0	NA	350	49	None	Not amplified
TCGA-66-2765-01	5.8263	8.054	LUSC	I	61	0	NA	89	17	None	Not amplified
TCGA-66-2766-01	9.6541	7.3974	LUSC	I	31	0	NA	323	39	None	Amplified
TCGA-66-2767-01	8.312	10.3435	LUSC	I	61	0	NA	292	57	None	Not amplified
TCGA-66-2768-01	5.847	8.2471	LUSC	I	61	0	NA	220	30	None	Not amplified
TCGA-66-2769-01	7.5006	8.2156	LUSC	I	215	1	NA	NA	NA	None	Not amplified
TCGA-66-2770-01	9.2208	8.8835	LUSC	I	700	0	NA	193	25	None	Not amplified
TCGA-66-2771-01	6.6279	9.5129	LUSC	I	578	0	NA	224	32	None	Not amplified
TCGA-66-2773-01	8.721	8.7494	LUSC	I	92	1	NA	492	92	None	Not amplified
TCGA-66-2777-01	6.4066	7.3835	LUSC	I	61	0	NA	162	27	None	Not amplified
TCGA-66-2778-01	4.7576	7.1894	LUSC	I	578	0	NA	124	24	None	Not amplified
TCGA-66-2780-01	5.3353	7.023	LUSC	I	366	1	NA	108	20	None	Not amplified
TCGA-66-2781-01	4.948	7.643	LUSC	I	121	0	NA	128	9	None	Not amplified
TCGA-66-2782-01	5.9013	8.1475	LUSC	I	365	1	NA	293	36	None	Not amplified
TCGA-66-2783-01	7.6421	7.7362	LUSC	I	759	0	NA	209	37	None	Not amplified
TCGA-66-2785-01	7.5449	10.0681	LUSC	I	60	0	NA	1045	204	None	Not amplified
TCGA-66-2786-01	4.9504	8.9882	LUSC	I	790	0	NA	203	36	None	Not amplified
TCGA-66-2787-01	9.8792	9.4929	LUSC	I	1217	0	NA	464	74	None	Not amplified
TCGA-66-2788-01	7.3053	8.8841	LUSC	I	699	0	NA	174	32	None	Not amplified
TCGA-66-2789-01	5.5181	6.6491	LUSC	III	123	1	NA	295	42	None	Not amplified
TCGA-66-2790-01	5.7871	8.9854	LUSC	I	699	0	NA	NA	NA	None	Not amplified
TCGA-66-2791-01	9.4845	9.6931	LUSC	I	153	1	NA	285	38	None	Not amplified
TCGA-66-2792-01	8.8428	6.9504	LUSC	III	913	0	NA	140	31	None	Not amplified
TCGA-66-2793-01	3.3575	6.7873	LUSC	II	306	1	NA	275	52	None	Not amplified
TCGA-66-2794-01	8.8715	10.8989	LUSC	I	1645	0	NA	140	30	None	Amplified
TCGA-66-2795-01	5.8483	7.6781	LUSC	I	122	0	NA	318	54	None	Not amplified
TCGA-66-2800-01	6.3861	7.1552	LUSC	I	1492	0	NA	195	33	None	Not amplified
TCGA-67-3770-01	5.4044	7.6114	LUAD	I	31	0	NA	NA	42	None	Not amplified
TCGA-67-3771-01	5.8336	8.5329	LUAD	I	610	0	NA	928	195	None	Not amplified
TCGA-67-3772-01	3.9554	7.3361	LUAD	IV	573	0	NA	81	17	None	Not amplified
TCGA-67-3773-01	6.6089	8.7083	LUAD	I	427	0	NA	92	25	None	Not amplified
TCGA-67-3774-01	5.703	7.9773	LUAD	I	385	0	NA	96	25	None	Not amplified
TCGA-67-4679-01	6.1614	8.0275	LUAD	I	NA	NA	NA	NA	43	None	Not amplified
TCGA-67-6215-01	4.8359	5.9031	LUAD	III	174	0	NA	113	30	None	Not amplified
TCGA-67-6216-01	6.7662	8.1905	LUAD	I	141	0	NA	46	12	None	Not amplified
TCGA-67-6217-01	5.8963	9.129	LUAD	I	422	0	NA	168	26	None	Not amplified
TCGA-68-7755-01	8.7669	6.5532	LUSC	III	83	0	NA	NA	NA	None	Not amplified
TCGA-68-7756-01	6.6492	6.6625	LUSC	III	202	0	NA	NA	NA	None	Not amplified
TCGA-68-7757-01	5.0211	5.0872	LUSC	III	211	0	NA	NA	NA	None	Not amplified
TCGA-68-8250-01	6.71	8.2064	LUSC	I	244	0	NA	NA	NA	None	Not amplified
TCGA-68-8251-01	5.6516	8.2185	LUSC	I	406	0	NA	NA	NA	None	Not amplified
TCGA-68-A59I-01	6.0875	8.1636	LUSC	I	492	0	NA	NA	NA	None	Not amplified
TCGA-68-A59J-01	10.1397	9.3194	LUSC	I	448	0	NA	NA	NA	None	Not amplified
TCGA-69-7760-01	4.7673	5.312	LUAD	III	202	0	NA	81	NA	None	Not amplified
TCGA-69-7761-01	6.7384	9.9294	LUAD	I	186	0	NA	35	NA	None	Not amplified
TCGA-69-7763-01	5.4052	7.1645	LUAD	I	690	0	NA	70	NA	None	Not amplified
TCGA-69-7764-01	5.2531	8.6253	LUAD	I	414	0	NA	77	NA	None	Not amplified
TCGA-69-7765-01	6.015	8.0837	LUAD	I	165	0	NA	543	NA	None	Not amplified
TCGA-69-7973-01	5.2538	7.5688	LUAD	I	230	0	NA	NA	NA	None	Not amplified
TCGA-69-7974-01	8.6475	8.1152	LUAD	I	184	0	NA	NA	NA	None	Not amplified
TCGA-69-7978-01	9.4672	9.773	LUAD	I	70	0	NA	NA	NA	None	Not amplified
TCGA-69-7979-01	5.8171	6.222	LUAD	III	89	0	NA	NA	NA	None	Not amplified
TCGA-69-7980-01	6.72	8.8397	LUAD	I	382	0	NA	688	NA	None	Not amplified
TCGA-69-8253-01	4.6438	6.4477	LUAD	II	100	0	NA	NA	NA	None	Not amplified
TCGA-69-8254-01	6.501	7.9095	LUAD	I	77	0	NA	NA	NA	None	Not amplified
TCGA-69-8255-01	6.2031	10.5609	LUAD	I	129	0	NA	NA	NA	None	Not amplified
TCGA-69-8453-01	6.5558	8.6337	LUAD	I	550	0	NA	NA	NA	None	Not amplified
TCGA-69-A59K-01	9.6668	8.7898	LUAD	I	214	0	NA	NA	NA	None	Amplified
TCGA-6A-AB49-01	6.6202	6.483	LUSC	III	NA	NA	NA	NA	NA	NA	Not amplified
TCGA-6D-AA2E-01	8.3217	8.1677	KIRC	I	267	0	NA	NA	NA	NA	Not amplified
TCGA-70-6722-01	8.6945	7.4718	LUSC	I	NA	NA	NA	253	52	None	Not amplified
TCGA-70-6723-01	4.5022	7.396	LUSC	IV	NA	NA	NA	102	19	None	Not amplified
TCGA-71-6725-01	4.4736	2.8561	LUAD	II	61	0	NA	56	37	None	Not amplified
TCGA-71-8520-01	5.9193	6.0734	LUAD	III	3	0	NA	NA	NA	None	NA
TCGA-73-4658-01	9.0617	8.4664	LUAD	I	1600	1	NA	271	63	None	Not amplified
TCGA-73-4659-01	6.0065	6.2933	LUAD	III	711	1	NA	184	21	None	Not amplified
TCGA-73-4662-01	7.3794	8.5477	LUAD	I	912	0	NA	205	38	None	Not amplified
TCGA-73-4666-01	9.4287	10.1458	LUAD	I	800	0	NA	NA	64	None	Not amplified
TCGA-73-4668-01	5.7119	7.3968	LUAD	I	467	0	NA	NA	86	None	Not amplified
TCGA-73-4670-01	5.5605	6.4401	LUAD	III	131	0	NA	NA	74	None	Not amplified
TCGA-73-4675-01	3.4884	6.1437	LUAD	II	40	0	NA	62	19	None	Not amplified
TCGA-73-4676-01	7.4172	7.9386	LUAD	I	164	0	NA	80	NA	None	Not amplified
TCGA-73-4677-01	5.1101	8.1632	LUAD	I	38	1	NA	NA	26	None	Not amplified
TCGA-73-7498-01	4.643	7.0778	LUAD	IV	1189	0	NA	110	NA	None	Not amplified
TCGA-73-7499-01	5.8653	10.438	LUAD	I	715	0	NA	76	NA	None	Not amplified
TCGA-73-A9RS-01	6.7949	7.9665	LUAD	I	340	1	NA	NA	NA	NA	Not amplified
TCGA-75-5122-01	8.9641	12.1906	LUAD	I	NA	NA	NA	125	30	None	Not amplified
TCGA-75-5125-01	10.1127	8.9893	LUAD	I	NA	NA	NA	NA	48	None	Not amplified
TCGA-75-5126-01	10.0323	9.5542	LUAD	I	NA	NA	NA	554	114	None	Not amplified
TCGA-75-5146-01	4.1127	7.9807	LUAD	IV	NA	NA	NA	163	17	None	Not amplified
TCGA-75-5147-01	5.9958	7.9549	LUAD	I	NA	NA	NA	47	8	None	Not amplified
TCGA-75-6203-01	6.4984	8.091	LUAD	I	NA	NA	NA	14	4	None	Not amplified
TCGA-75-6205-01	7.8654	9.7921	LUAD	I	NA	NA	NA	47	11	None	Not amplified
TCGA-75-6206-01	4.9638	6.6501	LUAD	III	NA	NA	NA	NA	21	None	Not amplified
TCGA-75-6207-01	9.2922	7.0102	LUAD	I	NA	NA	NA	64	11	None	Amplified
TCGA-75-6211-01	4.3267	7.9167	LUAD	IV	NA	NA	NA	313	50	None	Not amplified
TCGA-75-6212-01	5.6692	6.2594	LUAD	III	NA	NA	NA	25	4	None	Not amplified
TCGA-75-6214-01	6.5395	6.657	LUAD	III	NA	NA	NA	641	NA	None	Not amplified
TCGA-75-7025-01	5.0672	8.5539	LUAD	I	NA	NA	NA	33	NA	None	Not amplified
TCGA-75-7027-01	4.5772	7.0076	LUAD	IV	NA	NA	NA	207	NA	None	Not amplified
TCGA-75-7030-01	5.6123	8.9043	LUAD	I	NA	NA	NA	23	NA	None	Not amplified
TCGA-75-7031-01	5.3114	9.3213	LUAD	I	NA	NA	NA	189	NA	None	Not amplified
TCGA-76-4925-01	5.2909	4.8295	GBM	III	146	1	NA	41	8	None	Not amplified
TCGA-76-4926-01	4.916	4.0059	GBM	III	138	1	NA	39	9	None	Not amplified
TCGA-76-4927-01	3.7058	4.7389	GBM	II	535	1	NA	36	9	None	NA
TCGA-76-4928-01	7.216	4.0301	GBM	III	94	1	NA	52	16	None	Not amplified
TCGA-76-4929-01	4.3992	4.6118	GBM	II	111	1	NA	37	10	None	Not amplified
TCGA-76-4931-01	5.0237	4.3761	GBM	III	279	1	NA	11	3	None	Not amplified
TCGA-76-4932-01	5.3328	3.3858	GBM	III	1458	1	NA	40	NA	NA	NA
TCGA-77-6842-01	10.6926	9.4253	LUSC	I	899	1	NA	NA	NA	None	Not amplified
TCGA-77-6843-01	7.6395	5.5864	LUSC	III	2224	1	NA	NA	NA	None	Not amplified
TCGA-77-6844-01	6.0711	7.3	LUSC	I	2284	1	NA	NA	NA	None	Not amplified
TCGA-77-6845-01	6.033	5.0473	LUSC	III	708	1	NA	NA	NA	None	Not amplified
TCGA-77-7138-01	4.5608	5.3904	LUSC	II	340	1	NA	NA	NA	None	Not amplified
TCGA-77-7139-01	9.3978	7.3611	LUSC	I	2737	0	NA	NA	NA	None	Not amplified
TCGA-77-7140-01	8.4594	5.6567	LUSC	III	632	1	NA	NA	NA	None	Not amplified
TCGA-77-7141-01	7.5873	7.6238	LUSC	I	15	0	NA	NA	NA	None	Amplified
TCGA-77-7142-01	4.8419	7.5525	LUSC	I	1286	0	NA	NA	NA	None	Not amplified
TCGA-77-7335-01	6.0046	10.4869	LUSC	I	2133	1	NA	NA	NA	None	Not amplified
TCGA-77-7337-01	5.0902	7.7115	LUSC	I	3253	1	NA	NA	NA	None	Not amplified
TCGA-77-7338-01	6.6948	7.7446	LUSC	I	5	1	NA	NA	NA	None	Not amplified
TCGA-77-7463-01	7.4967	5.654	LUSC	III	1423	1	NA	NA	NA	None	Not amplified
TCGA-77-7465-01	6.5206	9.434	LUSC	I	479	0	NA	NA	NA	None	Not amplified
TCGA-77-8007-01	9.5516	8.9352	LUSC	I	198	1	NA	NA	NA	None	Not amplified
TCGA-77-8008-01	6.0347	7.5007	LUSC	I	2639	1	NA	NA	NA	None	Not amplified
TCGA-77-8009-01	7.1636	7.343	LUSC	I	1641	0	NA	NA	NA	None	Not amplified
TCGA-77-8128-01	5.0728	5.6822	LUSC	III	1150	1	NA	NA	NA	None	Not amplified
TCGA-77-8130-01	5.9905	4.5739	LUSC	III	2522	0	NA	NA	NA	None	Not amplified
TCGA-77-8131-01	7.0879	9.4043	LUSC	I	383	1	NA	NA	NA	None	Not amplified
TCGA-77-8133-01	6.2684	7.4096	LUSC	I	1640	1	NA	NA	NA	None	Not amplified
TCGA-77-8136-01	9.441	9.8044	LUSC	I	1189	1	NA	NA	NA	None	Amplified
TCGA-77-8138-01	5.7485	7.0675	LUSC	I	539	1	NA	NA	NA	None	Not amplified
TCGA-77-8139-01	5.4742	6.8247	LUSC	III	3166	0	NA	NA	NA	None	Not amplified
TCGA-77-8140-01	3.701	6.2767	LUSC	II	351	1	NA	NA	NA	None	Not amplified
TCGA-77-8143-01	6.5065	7.1986	LUSC	I	803	1	NA	NA	NA	None	Not amplified
TCGA-77-8144-01	5.2125	6.8252	LUSC	III	833	0	NA	NA	NA	None	Not amplified
TCGA-77-8145-01	5.0837	5.6423	LUSC	III	212	1	NA	NA	NA	None	Not amplified
TCGA-77-8146-01	3.7835	7.0619	LUSC	IV	2183	0	NA	NA	NA	None	NA
TCGA-77-8148-01	5.6844	7.2452	LUSC	I	293	0	NA	NA	NA	None	Not amplified
TCGA-77-8150-01	8.5021	9.0723	LUSC	I	1655	1	NA	NA	NA	None	Not amplified
TCGA-77-8153-01	6.0767	5.7296	LUSC	III	1992	0	NA	NA	NA	None	Not amplified
TCGA-77-8154-01	3.8753	5.1113	LUSC	II	1092	0	NA	NA	NA	None	Not amplified
TCGA-77-8156-01	6.059	9.6627	LUSC	I	10	0	NA	NA	NA	None	Not amplified
TCGA-77-A5FZ-01	7.4975	10.1367	LUSC	I	3838	1	NA	NA	NA	None	Not amplified
TCGA-77-A5G1-01	6.4375	7.2167	LUSC	I	4026	0	NA	NA	NA	None	Not amplified
TCGA-77-A5G3-01	9.4958	7.8831	LUSC	I	3576	0	NA	NA	NA	None	Not amplified
TCGA-77-A5G6-01	3.2184	5.8348	LUSC	II	678	1	NA	NA	NA	None	Not amplified
TCGA-77-A5G7-01	3.4644	6.5523	LUSC	II	180	1	NA	NA	NA	None	Not amplified
TCGA-77-A5G8-01	7.279	7.4904	LUSC	I	1290	0	NA	NA	NA	None	Not amplified
TCGA-77-A5GA-01	7.5464	6.8554	LUSC	III	1280	0	NA	NA	NA	None	Not amplified
TCGA-77-A5GB-01	6.3247	7.7013	LUSC	I	937	1	NA	NA	NA	None	Not amplified
TCGA-77-A5GF-01	10.3136	8.2249	LUSC	I	839	0	NA	NA	NA	None	Not amplified
TCGA-77-A5GH-01	7.9835	8.9064	LUSC	I	713	0	NA	NA	NA	None	Not amplified
TCGA-78-7143-01	5.9528	6.7614	LUAD	III	4961	1	NA	40	NA	None	Not amplified
TCGA-78-7145-01	5.9966	5.1897	LUAD	III	826	1	NA	165	NA	None	Not amplified
TCGA-78-7146-01	6.8508	7.8162	LUAD	I	173	1	NA	NA	NA	None	Not amplified
TCGA-78-7147-01	4.091	8.2209	LUAD	IV	586	1	NA	290	NA	None	Not amplified
TCGA-78-7148-01	4.6703	8.8928	LUAD	IV	626	1	NA	206	NA	None	Not amplified
TCGA-78-7149-01	2.576	6.702	LUAD	II	1093	0	NA	142	NA	None	Not amplified
TCGA-78-7150-01	4.358	7.0977	LUAD	IV	666	1	NA	352	NA	None	Not amplified
TCGA-78-7152-01	4.5977	8.7102	LUAD	IV	1202	0	NA	186	NA	None	Not amplified
TCGA-78-7153-01	2.4056	7.9462	LUAD	IV	760	0	NA	105	NA	None	Not amplified
TCGA-78-7154-01	4.8271	7.2889	LUAD	I	593	1	NA	201	NA	None	Not amplified
TCGA-78-7155-01	4.694	7.6855	LUAD	IV	1171	1	NA	1320	NA	None	Not amplified
TCGA-78-7156-01	3.0811	6.5778	LUAD	II	976	1	NA	250	NA	None	Not amplified
TCGA-78-7158-01	5.1303	5.7015	LUAD	III	179	1	NA	208	NA	None	Not amplified
TCGA-78-7159-01	5.1131	7.5781	LUAD	I	1221	0	NA	254	NA	None	Not amplified
TCGA-78-7160-01	6.3195	9.8597	LUAD	I	678	0	NA	33	NA	None	Not amplified
TCGA-78-7161-01	3.7143	6.8396	LUAD	II	215	0	NA	151	NA	None	Not amplified
TCGA-78-7162-01	5.3534	8.6246	LUAD	I	3169	1	NA	83	NA	None	Not amplified
TCGA-78-7163-01	5.7749	7.6334	LUAD	I	6812	0	NA	26	NA	None	Not amplified
TCGA-78-7166-01	4.6223	6.8966	LUAD	II	258	1	NA	190	NA	None	Not amplified
TCGA-78-7167-01	2.191	6.6561	LUAD	II	2681	1	NA	163	NA	None	Not amplified
TCGA-78-7220-01	5.2887	8.0585	LUAD	I	807	1	NA	NA	NA	None	Not amplified
TCGA-78-7535-01	4.8078	6.4312	LUAD	III	949	1	NA	142	NA	None	Not amplified
TCGA-78-7536-01	5.0213	7.8977	LUAD	I	244	1	NA	497	NA	None	Not amplified
TCGA-78-7537-01	4.0299	7.898	LUAD	IV	1622	1	NA	128	NA	None	Not amplified
TCGA-78-7539-01	6.1155	9.4463	LUAD	I	327	0	NA	415	NA	None	Not amplified
TCGA-78-7540-01	4.9147	6.4995	LUAD	III	881	0	NA	26	NA	None	Not amplified
TCGA-78-7542-01	9.1497	7.7211	LUAD	I	321	1	NA	308	NA	None	Not amplified
TCGA-78-7633-01	4.3221	4.9649	LUAD	II	994	0	NA	97	NA	None	Not amplified
TCGA-78-8640-01	4.8291	7.9667	LUAD	I	6528	0	NA	NA	NA	None	Not amplified
TCGA-78-8648-01	6.7846	10.1817	LUAD	I	1209	1	NA	NA	NA	None	Not amplified
TCGA-78-8655-01	5.6733	8.6665	LUAD	I	2360	0	NA	NA	NA	None	Not amplified
TCGA-78-8660-01	7.0723	9.2443	LUAD	I	321	1	NA	NA	NA	None	Not amplified
TCGA-78-8662-01	3.3597	6.6092	LUAD	II	3361	1	NA	NA	NA	None	Not amplified
TCGA-79-5596-01	7.1603	5.2272	LUSC	III	NA	NA	NA	NA	NA	None	Not amplified
TCGA-80-5607-01	6.1158	9.412	LUAD	I	NA	NA	NA	124	NA	None	Not amplified
TCGA-80-5608-01	5.8337	7.9449	LUAD	I	NA	NA	NA	146	NA	None	Not amplified
TCGA-80-5611-01	5.6129	7.0922	LUAD	I	NA	NA	NA	NA	33	None	Not amplified
TCGA-83-5908-01	10.2316	10.6927	LUAD	I	824	0	NA	NA	NA	None	Not amplified
TCGA-85-6175-01	6.69	8.4344	LUSC	I	294	1	NA	49	8	None	Not amplified
TCGA-85-6560-01	5.754	9.195	LUSC	I	364	0	NA	394	73	None	Not amplified
TCGA-85-6561-01	8.2242	9.4411	LUSC	I	395	0	NA	706	139	None	Not amplified
TCGA-85-6798-01	6.4295	4.6507	LUSC	III	34	0	NA	NA	NA	None	Not amplified
TCGA-85-7696-01	4.9483	6.9663	LUSC	III	18	0	NA	NA	NA	None	Not amplified
TCGA-85-7697-01	4.8746	7.9593	LUSC	I	10	0	NA	NA	NA	None	Not amplified
TCGA-85-7698-01	9.1674	8.4034	LUSC	I	49	0	NA	NA	NA	None	Not amplified
TCGA-85-7699-01	6.9867	10.2374	LUSC	I	1	0	NA	NA	NA	None	Not amplified
TCGA-85-7710-01	5.5608	8.0361	LUSC	I	NA	NA	NA	NA	NA	None	Not amplified
TCGA-85-7843-01	3.9996	6.4226	LUSC	II	35	0	NA	NA	NA	None	Not amplified
TCGA-85-7844-01	7.6087	7.8233	LUSC	I	911	0	NA	NA	NA	None	Not amplified
TCGA-85-7950-01	7.7531	9.2913	LUSC	I	60	0	NA	NA	NA	None	Not amplified
TCGA-85-8048-01	6.738	9.4305	LUSC	I	26	0	NA	NA	NA	None	Not amplified
TCGA-85-8049-01	7.0674	9.1961	LUSC	I	60	0	NA	NA	NA	None	Not amplified
TCGA-85-8052-01	6.6643	6.9419	LUSC	III	16	0	NA	NA	NA	None	Not amplified
TCGA-85-8070-01	9.0544	5.7912	LUSC	III	510	0	NA	NA	NA	None	Not amplified
TCGA-85-8071-01	6.4592	7.5373	LUSC	I	428	0	NA	NA	NA	None	Not amplified
TCGA-85-8072-01	8.3591	8.0139	LUSC	I	513	0	NA	NA	NA	None	Not amplified
TCGA-85-8276-01	5.7079	9.0078	LUSC	I	13	0	NA	NA	NA	None	Not amplified
TCGA-85-8277-01	9.5166	8.0115	LUSC	I	307	1	NA	NA	NA	None	Not amplified
TCGA-85-8287-01	5.671	9.5709	LUSC	I	13	0	NA	NA	NA	None	Not amplified
TCGA-85-8288-01	5.2946	7.9342	LUSC	I	54	0	NA	NA	NA	None	Not amplified
TCGA-85-8350-01	4.6129	7.8147	LUSC	IV	683	0	NA	NA	NA	None	Not amplified
TCGA-85-8351-01	6.1121	6.5472	LUSC	III	510	0	NA	NA	NA	None	Not amplified
TCGA-85-8352-01	3.4058	7.4733	LUSC	IV	161	1	NA	NA	NA	None	Not amplified
TCGA-85-8353-01	6.6225	8.4314	LUSC	I	94	1	NA	NA	NA	None	Not amplified
TCGA-85-8354-01	4.8818	6.372	LUSC	III	658	0	NA	NA	NA	None	Not amplified
TCGA-85-8355-01	9.8141	9.7611	LUSC	I	61	0	NA	NA	NA	None	Not amplified
TCGA-85-8479-01	2.3401	5.2315	LUSC	II	22	0	NA	NA	NA	None	Not amplified
TCGA-85-8481-01	6.3918	6.7917	LUSC	III	236	1	NA	NA	NA	None	Not amplified
TCGA-85-8580-01	5.8711	6.8088	LUSC	III	445	0	NA	NA	NA	None	Not amplified
TCGA-85-8582-01	5.9101	7.0344	LUSC	I	424	0	NA	NA	NA	None	Not amplified
TCGA-85-8584-01	6.6704	9.9739	LUSC	I	383	1	NA	NA	NA	None	Not amplified
TCGA-85-8664-01	2.9349	6.4913	LUSC	II	3	0	NA	NA	NA	None	Not amplified
TCGA-85-8666-01	5.7811	7.0729	LUSC	I	475	0	NA	NA	NA	None	Not amplified
TCGA-85-A4CL-01	4.9447	9.6931	LUSC	I	781	0	NA	NA	NA	None	Not amplified
TCGA-85-A4CN-01	7.3584	8.1353	LUSC	I	588	0	NA	NA	NA	None	Not amplified
TCGA-85-A4JB-01	5.0394	6.5313	LUSC	III	539	0	NA	NA	NA	None	Not amplified
TCGA-85-A4JC-01	3.6477	6.3069	LUSC	II	455	0	NA	NA	NA	None	Not amplified
TCGA-85-A4PA-01	6.1851	9.6171	LUSC	I	741	0	NA	NA	NA	None	Not amplified
TCGA-85-A4QQ-01	4.2825	6.7808	LUSC	II	553	0	NA	NA	NA	None	Not amplified
TCGA-85-A4QR-01	5.2134	3.9486	LUSC	III	600	0	NA	NA	NA	None	Not amplified
TCGA-85-A50M-01	7.5279	6.6246	LUSC	III	382	0	NA	NA	NA	None	Not amplified
TCGA-85-A50Z-01	6.2398	6.9709	LUSC	III	493	0	NA	NA	NA	None	Not amplified
TCGA-85-A510-01	4.9729	9.0634	LUSC	I	482	0	NA	NA	NA	None	Not amplified
TCGA-85-A511-01	6.2561	8.0573	LUSC	I	455	1	NA	NA	NA	None	Not amplified
TCGA-85-A512-01	5.1197	6.1997	LUSC	III	NA	NA	NA	NA	NA	None	Not amplified
TCGA-85-A513-01	5.7349	9.0743	LUSC	I	24	0	NA	NA	NA	None	Not amplified
TCGA-85-A53L-01	5.0627	6.8166	LUSC	III	377	0	NA	NA	NA	None	Not amplified
TCGA-85-A5B5-01	7.1949	6.0581	LUSC	III	111	0	NA	NA	NA	None	Not amplified
TCGA-86-6562-01	6.1863	6.1432	LUAD	III	376	1	NA	55	6	None	Not amplified
TCGA-86-6851-01	7.329	9.8722	LUAD	I	179	0	NA	824	NA	None	Not amplified
TCGA-86-7701-01	6.284	9.3304	LUAD	I	11	0	NA	NA	NA	None	Not amplified
TCGA-86-7711-01	5.9727	7.9031	LUAD	I	630	0	NA	NA	NA	None	Not amplified
TCGA-86-7713-01	5.1354	5.5525	LUAD	III	422	0	NA	140	NA	None	Not amplified
TCGA-86-7714-01	4.6688	6.4507	LUAD	II	625	1	NA	69	NA	None	Not amplified
TCGA-86-7953-01	5.5299	7.8545	LUAD	I	591	0	NA	NA	NA	None	Not amplified
TCGA-86-7954-01	6.8521	8.5377	LUAD	I	NA	NA	NA	NA	NA	None	Not amplified
TCGA-86-7955-01	4.4651	6.6057	LUAD	II	508	0	NA	NA	NA	None	Not amplified
TCGA-86-8054-01	5.0137	6.391	LUAD	III	745	0	NA	NA	NA	None	Not amplified
TCGA-86-8055-01	6.395	7.0368	LUAD	I	124	1	NA	NA	NA	None	Not amplified
TCGA-86-8056-01	6.0167	7.1603	LUAD	I	NA	NA	NA	NA	NA	None	Not amplified
TCGA-86-8073-01	4.6473	7.4015	LUAD	IV	740	0	NA	NA	NA	None	Not amplified
TCGA-86-8074-01	6.3152	7.3542	LUAD	I	24	0	NA	NA	NA	None	Not amplified
TCGA-86-8075-01	6.718	5.7042	LUAD	III	479	0	NA	NA	NA	None	Not amplified
TCGA-86-8076-01	6.1291	10.0969	LUAD	I	489	0	NA	NA	NA	None	Not amplified
TCGA-86-8278-01	6.5756	6.7491	LUAD	III	476	0	NA	NA	NA	None	Not amplified
TCGA-86-8279-01	4.231	5.2605	LUAD	II	482	0	NA	NA	NA	None	Not amplified
TCGA-86-8280-01	6.5273	8.2895	LUAD	I	16	0	NA	NA	NA	None	Not amplified
TCGA-86-8281-01	3.8659	6.7157	LUAD	II	NA	NA	NA	NA	NA	None	Not amplified
TCGA-86-8358-01	4.9154	7.8811	LUAD	I	653	0	NA	NA	NA	None	Not amplified
TCGA-86-8359-01	4.9716	10.5685	LUAD	I	444	1	NA	NA	NA	None	Not amplified
TCGA-86-8585-01	5.9461	9.2124	LUAD	I	35	0	NA	NA	NA	None	Not amplified
TCGA-86-8668-01	5.8835	7.383	LUAD	I	423	0	NA	NA	NA	None	Not amplified
TCGA-86-8669-01	5.8664	7.7624	LUAD	I	938	0	NA	NA	NA	None	Not amplified
TCGA-86-8671-01	6.8463	10.2771	LUAD	I	839	0	NA	NA	NA	None	Not amplified
TCGA-86-8672-01	6.6651	9.4884	LUAD	I	19	1	NA	NA	NA	None	Not amplified
TCGA-86-8673-01	4.0735	8.5033	LUAD	IV	455	0	NA	NA	NA	None	Not amplified
TCGA-86-8674-01	4.2891	5.689	LUAD	II	405	0	NA	NA	NA	None	Not amplified
TCGA-86-A456-01	6.7156	8.0095	LUAD	I	405	0	NA	NA	NA	None	Not amplified
TCGA-86-A4D0-01	4.758	7.2501	LUAD	I	116	1	NA	NA	NA	None	Not amplified
TCGA-86-A4JF-01	8.0353	8.1811	LUAD	I	536	0	NA	NA	NA	None	Not amplified
TCGA-86-A4P7-01	5.7329	9.0276	LUAD	I	415	0	NA	NA	NA	None	Not amplified
TCGA-86-A4P8-01	6.4826	9.6005	LUAD	I	431	0	NA	NA	NA	None	Not amplified
TCGA-90-6837-01	5.792	7.6494	LUSC	I	758	0	NA	NA	NA	None	Not amplified
TCGA-90-7766-01	6.5701	8.481	LUSC	I	289	0	NA	NA	NA	None	Not amplified
TCGA-90-7767-01	8.3472	9.0207	LUSC	I	89	0	NA	NA	NA	None	Not amplified
TCGA-90-7769-01	8.38	5.356	LUSC	III	358	0	NA	NA	NA	None	Not amplified
TCGA-90-7964-01	4.8781	6.3622	LUSC	III	428	0	NA	NA	NA	None	Not amplified
TCGA-90-A4ED-01	3.8901	6.7647	LUSC	II	615	0	NA	NA	NA	None	Not amplified
TCGA-90-A4EE-01	7.3238	10.5939	LUSC	I	688	0	NA	NA	NA	None	Not amplified
TCGA-90-A59Q-01	6.2978	10.345	LUSC	I	322	1	NA	NA	NA	None	Not amplified
TCGA-91-6828-01	6.4955	8.9467	LUAD	I	323	0	NA	286	60	None	Not amplified
TCGA-91-6829-01	6.284	7.7464	LUAD	I	1258	1	NA	558	69	None	Not amplified
TCGA-91-6830-01	6.3344	8.8622	LUAD	I	60	0	NA	NA	NA	None	Not amplified
TCGA-91-6831-01	6.0064	6.8579	LUAD	III	310	0	NA	NA	51	None	Not amplified
TCGA-91-6835-01	7.3534	10.3606	LUAD	I	79	0	NA	87	15	None	Not amplified
TCGA-91-6836-01	7.7359	7.7654	LUAD	I	417	0	NA	NA	200	None	Not amplified
TCGA-91-6840-01	4.8332	8.9322	LUAD	I	372	0	NA	108	NA	None	Not amplified
TCGA-91-6847-01	5.0236	7.4937	LUAD	I	842	0	NA	73	NA	None	Not amplified
TCGA-91-6848-01	8.9854	9.1729	LUAD	I	224	0	NA	NA	NA	None	Not amplified
TCGA-91-6849-01	4.6708	8.4011	LUAD	IV	35	0	NA	92	NA	None	Not amplified
TCGA-91-7771-01	5.9968	9.5143	LUAD	I	492	0	NA	194	NA	None	Not amplified
TCGA-91-8496-01	6.7737	7.7095	LUAD	I	505	0	NA	NA	NA	None	Not amplified
TCGA-91-8497-01	6.0559	7.636	LUAD	I	434	1	NA	NA	NA	None	Not amplified
TCGA-91-8499-01	5.1157	7.8468	LUAD	I	36	0	NA	NA	NA	None	Not amplified
TCGA-91-A4BC-01	5.4187	11.6524	LUAD	I	44	0	NA	NA	NA	None	Not amplified
TCGA-91-A4BD-01	3.8228	6.7543	LUAD	II	603	0	NA	NA	NA	None	Not amplified
TCGA-92-7340-01	5.1	8.2959	LUSC	I	82	0	NA	NA	NA	None	Not amplified
TCGA-92-7341-01	6.3178	5.9187	LUSC	III	106	0	NA	NA	NA	None	Not amplified
TCGA-92-8063-01	7.195	7.1451	LUSC	I	122	0	NA	NA	NA	None	Not amplified
TCGA-92-8064-01	10.5905	10.8366	LUSC	I	160	0	NA	NA	NA	None	Not amplified
TCGA-92-8065-01	5.801	8.2753	LUSC	I	70	0	NA	NA	NA	None	Not amplified
TCGA-93-7347-01	6.016	10.0839	LUAD	I	297	0	NA	117	NA	None	Not amplified
TCGA-93-7348-01	4.9718	7.8299	LUAD	I	127	0	NA	100	NA	None	Not amplified
TCGA-93-8067-01	4.9763	6.2837	LUAD	III	186	0	NA	NA	NA	None	Not amplified
TCGA-93-A4JN-01	5.7267	6.6957	LUAD	III	718	0	NA	NA	NA	None	Not amplified
TCGA-93-A4JO-01	6.3587	9.2272	LUAD	I	33	1	NA	NA	NA	None	Not amplified
TCGA-93-A4JP-01	6.4667	7.0287	LUAD	I	578	0	NA	NA	NA	None	Not amplified
TCGA-93-A4JQ-01	7.2587	8.2785	LUAD	I	526	0	NA	NA	NA	None	Not amplified
TCGA-94-7033-01	4.4502	6.0473	LUSC	II	87	0	NA	NA	NA	None	Not amplified
TCGA-94-7557-01	6.5729	5.7898	LUSC	III	5	1	NA	NA	NA	None	Not amplified
TCGA-94-7943-01	4.5188	7.1243	LUSC	IV	143	0	NA	NA	NA	None	Not amplified
TCGA-94-8035-01	5.8175	5.7409	LUSC	III	122	0	NA	NA	NA	None	Not amplified
TCGA-94-8490-01	5.4279	7.257	LUSC	I	153	0	NA	NA	NA	None	Not amplified
TCGA-94-8491-01	6.0112	7.7144	LUSC	I	810	0	NA	NA	NA	None	Amplified
TCGA-94-A4VJ-01	4.6295	6.9155	LUSC	II	430	0	NA	NA	NA	None	Not amplified
TCGA-94-A5I4-01	4.9171	5.3407	LUSC	III	NA	NA	NA	NA	NA	None	Not amplified
TCGA-94-A5I6-01	7.3773	5.7206	LUSC	III	538	0	NA	NA	NA	None	Not amplified
TCGA-95-7039-01	6.4142	8.0745	LUAD	I	34	0	NA	1116	NA	None	Not amplified
TCGA-95-7043-01	3.2664	7.4642	LUAD	IV	2	0	NA	967	NA	None	Not amplified
TCGA-95-7562-01	5.6286	7.935	LUAD	I	87	1	NA	NA	NA	None	Not amplified
TCGA-95-7567-01	6.4765	8.4446	LUAD	I	163	0	NA	839	NA	None	Not amplified
TCGA-95-7944-01	7.8804	10.8339	LUAD	I	21	0	NA	NA	NA	None	Not amplified
TCGA-95-7947-01	6.2338	8.0649	LUAD	I	40	0	NA	457	NA	None	Not amplified
TCGA-95-7948-01	3.5675	6.8182	LUAD	II	133	0	NA	152	NA	None	Not amplified
TCGA-95-8039-01	6.6106	7.361	LUAD	I	27	0	NA	NA	NA	None	Not amplified
TCGA-95-8494-01	6.9469	5.7351	LUAD	III	84	0	NA	NA	NA	None	Not amplified
TCGA-95-A4VK-01	5.0105	8.4828	LUAD	I	121	0	NA	NA	NA	None	Not amplified
TCGA-95-A4VN-01	10.368	9.6505	LUAD	I	553	0	NA	NA	NA	None	Not amplified
TCGA-95-A4VP-01	5.216	8.634	LUAD	I	605	0	NA	NA	NA	None	Not amplified
TCGA-96-7544-01	8.7415	7.5644	LUSC	I	1213	0	NA	NA	NA	None	Not amplified
TCGA-96-7545-01	7.0434	8.2022	LUSC	I	1344	0	NA	NA	NA	None	Not amplified
TCGA-96-8169-01	5.6067	7.4427	LUSC	I	189	0	NA	NA	NA	None	Not amplified
TCGA-96-8170-01	4.8521	6.6859	LUSC	III	211	0	NA	NA	NA	None	Not amplified
TCGA-96-A4JK-01	5.0545	7.7447	LUSC	I	589	0	NA	NA	NA	None	Not amplified
TCGA-96-A4JL-01	7.1649	10.2337	LUSC	I	504	0	NA	NA	NA	EBV	Not amplified
TCGA-97-7546-01	7.3423	8.776	LUAD	I	964	0	NA	231	NA	None	Not amplified
TCGA-97-7547-01	5.8771	6.9075	LUAD	III	1965	0	NA	NA	NA	None	Not amplified
TCGA-97-7552-01	6.8563	10.9796	LUAD	I	1932	0	NA	26	NA	None	Not amplified
TCGA-97-7553-01	7.3921	9.4124	LUAD	I	1332	0	NA	79	NA	None	Not amplified
TCGA-97-7554-01	8.9894	7.9549	LUAD	I	775	0	NA	390	NA	None	Not amplified
TCGA-97-7937-01	4.127	5.3063	LUAD	II	181	0	NA	408	NA	None	Not amplified
TCGA-97-7938-01	6.8404	8.1363	LUAD	I	18	1	NA	331	NA	None	Not amplified
TCGA-97-7941-01	4.7656	7.7404	LUAD	I	22	0	NA	83	NA	None	Not amplified
TCGA-97-8171-01	3.193	3.7696	LUAD	II	107	0	NA	NA	NA	None	Not amplified
TCGA-97-8172-01	5.6653	8.6733	LUAD	I	182	0	NA	NA	NA	None	Not amplified
TCGA-97-8174-01	5.503	7.7284	LUAD	I	164	1	NA	NA	NA	None	Not amplified
TCGA-97-8175-01	7.5449	6.1898	LUAD	III	551	0	NA	NA	NA	None	Not amplified
TCGA-97-8176-01	3.6203	7.0227	LUAD	IV	468	1	NA	NA	NA	None	Not amplified
TCGA-97-8177-01	5.5864	8.3033	LUAD	I	147	0	NA	NA	NA	None	Not amplified
TCGA-97-8179-01	5.2279	6.7354	LUAD	III	15	0	NA	NA	NA	None	Not amplified
TCGA-97-8547-01	5.751	5.2965	LUAD	III	657	0	NA	NA	NA	None	Not amplified
TCGA-97-8552-01	5.4287	7.5037	LUAD	I	626	0	NA	NA	NA	None	Not amplified
TCGA-97-A4LX-01	7.8848	9.6727	LUAD	I	614	0	NA	NA	NA	None	Not amplified
TCGA-97-A4M0-01	6.1641	9.2011	LUAD	I	652	0	NA	NA	NA	None	Not amplified
TCGA-97-A4M1-01	5.292	7.5355	LUAD	I	601	0	NA	NA	NA	None	Not amplified
TCGA-97-A4M2-01	6.478	9.1893	LUAD	I	624	0	NA	NA	NA	None	Not amplified
TCGA-97-A4M3-01	4.3012	6.3384	LUAD	II	540	0	NA	NA	NA	None	Not amplified
TCGA-97-A4M5-01	6.0696	7.1122	LUAD	I	634	0	NA	NA	NA	None	Not amplified
TCGA-97-A4M6-01	5.9163	7.842	LUAD	I	568	0	NA	NA	NA	None	Not amplified
TCGA-97-A4M7-01	6.0039	8.2559	LUAD	I	629	0	NA	NA	NA	None	Not amplified
TCGA-98-7454-01	7.7261	9.2885	LUSC	I	256	0	NA	NA	NA	None	Not amplified
TCGA-98-8020-01	6.3709	8.2062	LUSC	I	84	1	NA	NA	NA	None	Not amplified
TCGA-98-8021-01	3.8616	7.2115	LUSC	IV	937	0	NA	NA	NA	None	Not amplified
TCGA-98-8022-01	5.1157	8.5157	LUSC	I	933	1	NA	NA	NA	None	Not amplified
TCGA-98-8023-01	5.4238	8.8774	LUSC	I	649	0	NA	NA	NA	None	Not amplified
TCGA-98-A538-01	6.1697	7.3243	LUSC	I	826	0	NA	NA	NA	HPV	Not amplified
TCGA-98-A539-01	5.6581	5.6581	LUSC	III	118	0	NA	NA	NA	None	Not amplified
TCGA-98-A53A-01	3.7324	8.1582	LUSC	IV	552	1	NA	NA	NA	None	Not amplified
TCGA-98-A53B-01	5.6981	8.1528	LUSC	I	61	1	NA	NA	NA	None	Not amplified
TCGA-98-A53C-01	7.4426	9.9218	LUSC	I	822	0	NA	NA	NA	None	Not amplified
TCGA-98-A53D-01	9.0117	8.5727	LUSC	I	645	1	NA	NA	NA	None	Not amplified
TCGA-98-A53H-01	7.7074	8.3893	LUSC	I	618	0	NA	NA	NA	None	Not amplified
TCGA-98-A53I-01	5.8919	8.6479	LUSC	I	565	0	NA	NA	NA	None	Not amplified
TCGA-98-A53J-01	6.4883	6.1955	LUSC	III	630	0	NA	NA	NA	None	Not amplified
TCGA-99-7458-01	8.352	9.575	LUAD	I	392	0	NA	419	NA	None	Not amplified
TCGA-99-8025-01	5.1695	6.3394	LUAD	III	1060	0	NA	NA	NA	None	Not amplified
TCGA-99-8028-01	8.2074	10.6883	LUAD	I	1118	0	NA	NA	NA	None	Not amplified
TCGA-99-8032-01	5.1304	7.2177	LUAD	I	44	0	NA	NA	NA	None	Not amplified
TCGA-99-8033-01	7.3838	9.3404	LUAD	I	170	0	NA	NA	NA	None	Not amplified
TCGA-99-AA5R-01	7.0836	9.6293	LUAD	I	189	0	NA	NA	NA	NA	Not amplified
TCGA-A1-A0SB-01	1.8887	4.8988	BRCA	II	259	0	NA	17	1	None	Not amplified
TCGA-A1-A0SD-01	4.7968	6.465	BRCA	III	437	0	NA	25	1	None	Not amplified
TCGA-A1-A0SE-01	3.8896	7.9123	BRCA	IV	1321	0	NA	18	6	None	Not amplified
TCGA-A1-A0SF-01	3.9603	9.4085	BRCA	IV	1463	0	NA	32	7	None	Not amplified
TCGA-A1-A0SG-01	4.1044	6.8958	BRCA	II	434	0	NA	26	4	None	Not amplified
TCGA-A1-A0SH-01	3.6913	5.9381	BRCA	II	1437	0	NA	73	20	None	Not amplified
TCGA-A1-A0SI-01	5.6396	9.1913	BRCA	I	635	0	NA	139	35	None	Not amplified
TCGA-A1-A0SJ-01	3.4909	7.5112	BRCA	IV	416	0	NA	27	7	None	Not amplified
TCGA-A1-A0SK-01	2.1592	5.5257	BRCA	II	967	1	NA	103	11	None	Not amplified
TCGA-A1-A0SM-01	4.0689	6.2017	BRCA	II	242	0	NA	23	7	None	Not amplified
TCGA-A1-A0SN-01	5.1683	9.0504	BRCA	I	1196	0	NA	39	5	None	Not amplified
TCGA-A1-A0SO-01	2.8516	6.4647	BRCA	II	852	0	NA	NA	41	None	Not amplified
TCGA-A1-A0SP-01	4.3198	6.9105	BRCA	II	584	0	NA	35	11	None	Not amplified
TCGA-A1-A0SQ-01	3.4172	6.0433	BRCA	II	554	0	NA	19	4	None	Not amplified
TCGA-A2-A04N-01	3.5481	6.7061	BRCA	II	3188	0	NA	33	6	None	Not amplified
TCGA-A2-A04P-01	4.8584	7.7215	BRCA	I	548	1	NA	85	25	None	Amplified
TCGA-A2-A04Q-01	7.2275	10.7876	BRCA	I	2385	0	NA	10	2	None	Amplified
TCGA-A2-A04R-01	3.5688	5.7806	BRCA	II	2499	0	NA	64	14	None	Not amplified
TCGA-A2-A04T-01	5.4971	8.6078	BRCA	I	2246	0	NA	69	NA	None	Amplified
TCGA-A2-A04U-01	1.8471	6.5385	BRCA	II	1486	0	NA	47	9	None	Not amplified
TCGA-A2-A04V-01	2.9105	6.1178	BRCA	II	1920	1	NA	27	3	None	Not amplified
TCGA-A2-A04W-01	3.0044	6.0643	BRCA	II	1948	0	NA	83	13	None	Not amplified
TCGA-A2-A04X-01	5.6651	8.863	BRCA	I	1686	0	NA	21	4	None	Not amplified
TCGA-A2-A04Y-01	4.0639	8.9429	BRCA	IV	1099	0	NA	45	5	None	Not amplified
TCGA-A2-A0CK-01	3.1172	7.9321	BRCA	IV	4159	0	NA	14	NA	None	Not amplified
TCGA-A2-A0CL-01	6.9548	10.8491	BRCA	I	1964	0	NA	17	3	None	Not amplified
TCGA-A2-A0CM-01	7.5035	9.5158	BRCA	I	754	1	NA	46	9	None	Not amplified
TCGA-A2-A0CO-01	5.4875	9.1097	BRCA	I	3492	1	NA	21	NA	None	Not amplified
TCGA-A2-A0CP-01	3.4664	7.0916	BRCA	IV	2813	0	NA	73	6	None	Not amplified
TCGA-A2-A0CQ-01	3.5941	6.4798	BRCA	II	2695	0	NA	27	8	None	Not amplified
TCGA-A2-A0CR-01	3.2436	10.6146	BRCA	IV	3283	0	NA	90	NA	None	Not amplified
TCGA-A2-A0CS-01	3.1448	5.2092	BRCA	II	2298	0	NA	26	7	None	Not amplified
TCGA-A2-A0CT-01	3.6191	5.4056	BRCA	II	2289	0	NA	61	20	None	Not amplified
TCGA-A2-A0CU-01	4.6024	6.5035	BRCA	II	158	1	NA	38	3	None	Not amplified
TCGA-A2-A0CV-01	4.5975	8.9686	BRCA	IV	1930	0	NA	19	8	None	Not amplified
TCGA-A2-A0CW-01	5.0896	7.2819	BRCA	I	1948	0	NA	49	9	None	Not amplified
TCGA-A2-A0CX-01	5.3273	7.0285	BRCA	I	1728	0	NA	153	54	None	Not amplified
TCGA-A2-A0CY-01	1.7889	5.9773	BRCA	II	1673	0	NA	NA	NA	None	NA
TCGA-A2-A0CZ-01	4.4563	8.3892	BRCA	IV	1616	0	NA	15	3	None	NA
TCGA-A2-A0D0-01	4.8583	8.3899	BRCA	I	643	0	NA	49	17	None	Not amplified
TCGA-A2-A0D1-01	2.9245	6.6557	BRCA	II	1051	0	NA	56	5	None	Not amplified
TCGA-A2-A0D2-01	4.1994	8.2271	BRCA	IV	1027	0	NA	66	14	None	Not amplified
TCGA-A2-A0D3-01	4.6543	8.3053	BRCA	IV	875	0	NA	19	5	None	Not amplified
TCGA-A2-A0D4-01	3.21	4.9206	BRCA	II	767	0	NA	27	5	None	Not amplified
TCGA-A2-A0EM-01	4.6318	5.8885	BRCA	II	3094	0	NA	27	1	None	Not amplified
TCGA-A2-A0EN-01	5.7506	9.5734	BRCA	I	2718	0	NA	26	5	None	Not amplified
TCGA-A2-A0EO-01	4.3226	7.9633	BRCA	IV	2442	0	NA	24	7	None	Not amplified
TCGA-A2-A0EP-01	6.3645	9.3246	BRCA	I	3273	0	NA	3	NA	None	Not amplified
TCGA-A2-A0EQ-01	6.4534	9.5815	BRCA	I	2426	0	NA	67	12	None	Not amplified
TCGA-A2-A0ER-01	3.2838	6.2657	BRCA	II	2263	0	NA	21	2	None	Not amplified
TCGA-A2-A0ES-01	4.3181	7.9759	BRCA	IV	1127	0	NA	4	1	None	Not amplified
TCGA-A2-A0ET-01	3.8075	7.8138	BRCA	IV	1066	0	NA	25	5	None	Not amplified
TCGA-A2-A0EU-01	4.8083	6.6429	BRCA	III	1043	0	NA	33	14	None	Not amplified
TCGA-A2-A0EV-01	5.0259	7.9786	BRCA	I	968	0	NA	53	7	None	Not amplified
TCGA-A2-A0EW-01	5.0236	8.5207	BRCA	I	905	0	NA	11	4	None	Not amplified
TCGA-A2-A0EX-01	3.4686	6.9798	BRCA	II	752	0	NA	27	6	None	Not amplified
TCGA-A2-A0EY-01	4.3239	7.6442	BRCA	IV	735	0	NA	151	26	None	Not amplified
TCGA-A2-A0ST-01	7.3384	10.5948	BRCA	I	3017	0	NA	3	1	None	Not amplified
TCGA-A2-A0SU-01	2.8128	7.6399	BRCA	IV	1662	0	NA	18	10	None	Not amplified
TCGA-A2-A0SV-01	4.4659	6.2122	BRCA	II	825	1	NA	25	7	None	Not amplified
TCGA-A2-A0SW-01	5.2423	10.0906	BRCA	I	1365	1	NA	42	9	None	Not amplified
TCGA-A2-A0SX-01	6.2628	9.4613	BRCA	I	1534	0	NA	20	5	None	Not amplified
TCGA-A2-A0SY-01	4.4984	7.934	BRCA	IV	1347	0	NA	97	23	None	Not amplified
TCGA-A2-A0T0-01	3.6401	6.2671	BRCA	II	533	0	NA	261	34	None	Not amplified
TCGA-A2-A0T1-01	6.112	9.5787	BRCA	I	521	0	NA	23	6	None	Not amplified
TCGA-A2-A0T2-01	2.6668	8.0949	BRCA	IV	255	1	NA	37	6	None	Not amplified
TCGA-A2-A0T3-01	3.5775	7.0642	BRCA	IV	569	0	NA	26	6	None	Not amplified
TCGA-A2-A0T4-01	4.4261	8.4287	BRCA	IV	624	0	NA	27	8	None	Not amplified
TCGA-A2-A0T5-01	3.8933	5.7616	BRCA	II	531	0	NA	1079	NA	None	Not amplified
TCGA-A2-A0T6-01	5.3434	8.4741	BRCA	I	575	0	NA	92	11	None	Not amplified
TCGA-A2-A0T7-01	4.3473	8.0004	BRCA	IV	631	0	NA	17	3	None	Not amplified
TCGA-A2-A0YC-01	4.7193	6.8795	BRCA	II	990	0	NA	16	2	None	Not amplified
TCGA-A2-A0YD-01	6.4375	8.2935	BRCA	I	769	0	NA	43	14	None	Not amplified
TCGA-A2-A0YE-01	3.5574	5.2862	BRCA	II	554	0	NA	37	NA	None	Not amplified
TCGA-A2-A0YF-01	4.2529	5.7371	BRCA	II	1535	0	NA	15	4	None	Not amplified
TCGA-A2-A0YG-01	3.7863	5.8685	BRCA	II	666	0	NA	37	8	None	Not amplified
TCGA-A2-A0YH-01	6.1475	8.0592	BRCA	I	659	0	NA	47	15	None	Not amplified
TCGA-A2-A0YI-01	4.8293	9.383	BRCA	I	1505	0	NA	9	3	None	Not amplified
TCGA-A2-A0YJ-01	4.4958	5.4367	BRCA	II	566	0	NA	46	16	None	Not amplified
TCGA-A2-A0YK-01	5.9039	10.2112	BRCA	I	588	0	NA	139	32	None	Not amplified
TCGA-A2-A0YL-01	5.5288	8.7153	BRCA	I	1474	0	NA	8	6	None	Not amplified
TCGA-A2-A0YM-01	5.328	7.2981	BRCA	I	965	0	NA	57	9	None	Not amplified
TCGA-A2-A0YT-01	4.0568	7.7365	BRCA	IV	723	1	NA	42	NA	None	Not amplified
TCGA-A2-A1FV-01	2.3093	5.7699	BRCA	II	714	0	NA	32	5	None	Not amplified
TCGA-A2-A1FW-01	3.93	6.4729	BRCA	II	528	0	NA	44	11	None	Not amplified
TCGA-A2-A1FX-01	3.9656	7.5904	BRCA	IV	1119	0	NA	16	3	None	Not amplified
TCGA-A2-A1FZ-01	3.9524	7.2323	BRCA	IV	683	0	NA	25	6	None	Not amplified
TCGA-A2-A1G0-01	4.7533	8.0335	BRCA	I	616	0	NA	20	3	None	Not amplified
TCGA-A2-A1G1-01	6.713	8.5576	BRCA	I	584	0	NA	22	8	None	Not amplified
TCGA-A2-A1G4-01	4.0786	7.0172	BRCA	IV	595	0	NA	26	5	None	Not amplified
TCGA-A2-A1G6-01	4.2986	8.7724	BRCA	IV	501	0	NA	4	0	None	Not amplified
TCGA-A2-A259-01	6.3985	6.7632	BRCA	III	1596	0	NA	11	5	None	Not amplified
TCGA-A2-A25A-01	5.3201	8.6133	BRCA	I	3276	0	NA	81	10	None	Not amplified
TCGA-A2-A25B-01	5.5278	7.308	BRCA	I	496	0	NA	68	16	None	Not amplified
TCGA-A2-A25C-01	5.2583	6.9395	BRCA	III	523	0	NA	20	3	None	Not amplified
TCGA-A2-A25D-01	5.7632	9.35	BRCA	I	552	0	NA	39	6	None	Not amplified
TCGA-A2-A25E-01	3.5474	6.6716	BRCA	II	2796	0	NA	47	15	None	Not amplified
TCGA-A2-A25F-01	8.2101	10.8182	BRCA	I	322	0	NA	3	0	None	Not amplified
TCGA-A2-A3KC-01	4.5897	7.4274	BRCA	IV	635	0	NA	25	NA	None	Not amplified
TCGA-A2-A3KD-01	3.6511	6.4475	BRCA	II	1206	0	NA	6	NA	None	Not amplified
TCGA-A2-A3XS-01	3.2534	7.5251	BRCA	IV	1032	1	NA	21	NA	None	Not amplified
TCGA-A2-A3XT-01	4.8598	7.5952	BRCA	I	2525	0	NA	70	NA	None	Not amplified
TCGA-A2-A3XU-01	0	5.3177	BRCA	II	912	1	NA	19	NA	None	Not amplified
TCGA-A2-A3XV-01	1.1955	4.8981	BRCA	II	699	0	NA	39	NA	None	Not amplified
TCGA-A2-A3XW-01	3.0156	7.9644	BRCA	IV	1505	0	NA	4	NA	None	Not amplified
TCGA-A2-A3XX-01	3.2582	7.3678	BRCA	IV	1439	1	NA	29	NA	None	Not amplified
TCGA-A2-A3XY-01	5.8871	7.3315	BRCA	I	1064	0	NA	36	NA	None	Not amplified
TCGA-A2-A3XZ-01	4.8011	8.1992	BRCA	I	1165	0	NA	32	NA	None	Not amplified
TCGA-A2-A3Y0-01	5.9483	8.7085	BRCA	I	1167	0	NA	144	NA	None	Not amplified
TCGA-A2-A4RW-01	3.7122	8.3517	BRCA	IV	222	0	NA	89	NA	None	Not amplified
TCGA-A2-A4RX-01	4.4459	8.1365	BRCA	IV	742	0	NA	14	NA	None	Not amplified
TCGA-A2-A4RY-01	4.4044	7.6029	BRCA	IV	648	0	NA	14	NA	None	Not amplified
TCGA-A2-A4S0-01	3.6413	5.1681	BRCA	II	706	0	NA	6	NA	None	Not amplified
TCGA-A2-A4S1-01	0.8881	6.9083	BRCA	II	820	0	NA	62	NA	NA	Not amplified
TCGA-A2-A4S2-01	6.6924	8.7692	BRCA	I	643	0	NA	33	NA	None	Not amplified
TCGA-A2-A4S3-01	4.3857	8.0909	BRCA	IV	666	0	NA	59	NA	None	Not amplified
TCGA-A3-3306-01	4.9309	7.3715	KIRC	I	1120	0	NA	NA	NA	None	Not amplified
TCGA-A3-3307-01	5.7359	9.6122	KIRC	I	1436	0	NA	NA	NA	None	Not amplified
TCGA-A3-3308-01	6.6386	7.601	KIRC	I	16	0	NA	16	15	None	Not amplified
TCGA-A3-3311-01	5.6731	9.1136	KIRC	I	1191	1	NA	15	20	None	Not amplified
TCGA-A3-3313-01	8.1445	5.2325	KIRC	III	735	1	NA	NA	NA	None	Not amplified
TCGA-A3-3316-01	3.7996	7.6064	KIRC	IV	1493	0	NA	10	6	None	Not amplified
TCGA-A3-3317-01	5.7673	9.2087	KIRC	I	1491	0	NA	18	20	None	Not amplified
TCGA-A3-3319-01	4.3587	8.4884	KIRC	IV	1130	0	NA	21	13	None	Not amplified
TCGA-A3-3320-01	5.9177	8.2442	KIRC	I	1508	0	NA	27	15	None	Not amplified
TCGA-A3-3322-01	5.5433	6.2678	KIRC	III	1478	0	NA	14	15	None	Not amplified
TCGA-A3-3323-01	4.8794	8.6935	KIRC	I	1106	0	NA	12	16	None	Not amplified
TCGA-A3-3324-01	6.4075	9.6338	KIRC	I	1186	0	NA	NA	NA	None	Not amplified
TCGA-A3-3325-01	5.1153	7.336	KIRC	I	751	0	NA	NA	NA	None	Not amplified
TCGA-A3-3326-01	6.3162	8.057	KIRC	I	1137	0	NA	11	8	None	Not amplified
TCGA-A3-3328-01	5.9354	1.9232	KIRC	III	1385	0	NA	NA	NA	None	NA
TCGA-A3-3329-01	5.3252	9.085	KIRC	I	706	0	NA	NA	NA	None	NA
TCGA-A3-3331-01	5.9197	8.8869	KIRC	I	1485	0	NA	NA	NA	None	Not amplified
TCGA-A3-3335-01	8.2036	7.5952	KIRC	I	665	0	NA	NA	NA	HBV	Not amplified
TCGA-A3-3343-01	5.57	7.636	KIRC	I	945	0	NA	NA	NA	None	Not amplified
TCGA-A3-3346-01	5.2802	9.2132	KIRC	I	137	1	NA	14	22	None	Not amplified
TCGA-A3-3347-01	5.8185	8.9755	KIRC	I	1610	1	NA	6	10	None	Not amplified
TCGA-A3-3349-01	3.883	8.483	KIRC	IV	1385	0	NA	13	10	None	Not amplified
TCGA-A3-3351-01	6.3889	11.0155	KIRC	I	910	0	NA	NA	NA	None	Not amplified
TCGA-A3-3352-01	5.7924	7.3509	KIRC	I	561	1	NA	NA	NA	None	Not amplified
TCGA-A3-3357-01	5.7019	9.9073	KIRC	I	2688	0	NA	17	10	None	Not amplified
TCGA-A3-3358-01	5.9259	9.9786	KIRC	I	1307	0	NA	16	10	None	Not amplified
TCGA-A3-3359-01	5.8826	10.1248	KIRC	I	2504	0	NA	NA	NA	None	Not amplified
TCGA-A3-3362-01	5.4973	8.3372	KIRC	I	1559	0	NA	15	8	None	Not amplified
TCGA-A3-3363-01	5.5697	7.1274	KIRC	I	319	0	NA	16	12	None	Not amplified
TCGA-A3-3365-01	4.4189	8.1232	KIRC	IV	873	0	NA	9	15	None	Not amplified
TCGA-A3-3367-01	6.3995	7.6682	KIRC	I	2270	0	NA	26	14	None	Not amplified
TCGA-A3-3370-01	6.8457	10.6977	KIRC	I	2274	0	NA	16	NA	None	Not amplified
TCGA-A3-3372-01	5.9791	8.6758	KIRC	I	735	0	NA	24	18	None	Not amplified
TCGA-A3-3373-01	5.7707	7.4315	KIRC	I	1621	0	NA	20	14	None	Not amplified
TCGA-A3-3374-01	8.443	6.3187	KIRC	III	1314	0	NA	NA	NA	None	Not amplified
TCGA-A3-3376-01	5.3032	7.7026	KIRC	I	1696	1	NA	11	15	None	Not amplified
TCGA-A3-3378-01	7.2373	10.1108	KIRC	I	630	0	NA	9	16	None	Not amplified
TCGA-A3-3380-01	4.4781	7.7357	KIRC	IV	567	0	NA	9	10	HBV	Not amplified
TCGA-A3-3382-01	5.0763	9.1716	KIRC	I	574	0	NA	29	17	None	Not amplified
TCGA-A3-3383-01	2.5456	8.626	KIRC	IV	861	0	NA	10	10	None	Not amplified
TCGA-A3-3385-01	5.9988	5.6564	KIRC	III	1993	0	NA	10	13	None	Not amplified
TCGA-A3-3387-01	4.9211	7.6733	KIRC	I	617	0	NA	21	16	None	Not amplified
TCGA-A3-A6NI-01	4.918	5.8221	KIRC	III	NA	NA	NA	NA	NA	None	Not amplified
TCGA-A3-A6NJ-01	6.8905	11.0142	KIRC	I	468	0	NA	NA	NA	None	Not amplified
TCGA-A3-A6NL-01	4.5135	8.1497	KIRC	IV	689	0	NA	NA	NA	None	Not amplified
TCGA-A3-A6NN-01	5.5991	8.3557	KIRC	I	3	0	NA	NA	NA	None	Not amplified
TCGA-A3-A8CQ-01	4.4943	6.951	KIRC	II	3	0	NA	NA	NA	NA	Not amplified
TCGA-A3-A8OU-01	5.4213	8.1363	KIRC	I	NA	NA	NA	NA	NA	NA	Not amplified
TCGA-A3-A8OV-01	4.7327	6.565	KIRC	II	340	0	NA	NA	NA	NA	Not amplified
TCGA-A3-A8OW-01	5.8932	9.6047	KIRC	I	323	0	NA	NA	NA	NA	Not amplified
TCGA-A3-A8OX-01	6.288	8.7524	KIRC	I	NA	NA	NA	NA	NA	NA	Not amplified
TCGA-A4-7286-01	4.4943	8.0022	KIRP	IV	554	0	NA	33	12	None	Not amplified
TCGA-A4-7287-01	3.2655	7.8744	KIRP	IV	234	0	NA	36	8	None	Not amplified
TCGA-A4-7288-01	5.6883	2.9892	KIRP	III	1857	0	NA	56	14	None	Not amplified
TCGA-A4-7583-01	5.459	7.9787	KIRP	I	3	0	NA	55	20	None	Not amplified
TCGA-A4-7584-01	4.3325	3.9411	KIRP	II	NA	NA	NA	63	16	None	Not amplified
TCGA-A4-7585-01	7.9341	9.6087	KIRP	I	1070	1	NA	76	20	None	Not amplified
TCGA-A4-7732-01	3.4162	4.8805	KIRP	II	582	0	NA	113	16	None	Not amplified
TCGA-A4-7734-01	4.6467	6.63	KIRP	II	27	0	NA	45	16	None	Not amplified
TCGA-A4-7828-01	4.3173	6.1624	KIRP	II	NA	NA	NA	36	8	None	Not amplified
TCGA-A4-7915-01	6.4196	8.5793	KIRP	I	7	0	NA	25	4	None	Not amplified
TCGA-A4-7996-01	5.7241	7.9533	KIRP	I	506	0	NA	73	18	None	Not amplified
TCGA-A4-7997-01	5.1672	5.7767	KIRP	III	927	0	NA	61	20	None	Not amplified
TCGA-A4-8098-01	6.3924	6.6196	KIRP	III	896	0	NA	81	12	None	Not amplified
TCGA-A4-8310-01	4.9863	4.2127	KIRP	III	780	0	NA	65	21	None	Not amplified
TCGA-A4-8311-01	3.5417	5.3232	KIRP	II	729	0	NA	38	13	None	Not amplified
TCGA-A4-8312-01	6.355	6.6413	KIRP	III	708	0	NA	13	1	None	Not amplified
TCGA-A4-8515-01	2.9742	4.9938	KIRP	II	709	0	NA	106	25	None	Not amplified
TCGA-A4-8516-01	4.5858	6.5814	KIRP	II	23	0	NA	NA	NA	None	Not amplified
TCGA-A4-8517-01	6.2645	5.5225	KIRP	III	597	0	NA	70	16	None	Not amplified
TCGA-A4-8518-01	4.4285	5.4634	KIRP	II	600	0	NA	17	2	None	Not amplified
TCGA-A4-8630-01	3.9207	5.2645	KIRP	II	436	0	NA	46	13	None	Not amplified
TCGA-A4-A48D-01	7.4432	6.4994	KIRP	III	379	0	NA	110	26	None	Not amplified
TCGA-A4-A4ZT-01	5.9069	6.5541	KIRP	III	516	0	NA	123	22	None	Not amplified
TCGA-A4-A57E-01	4.6427	5.8262	KIRP	II	258	1	NA	167	19	None	Not amplified
TCGA-A4-A5DU-01	3.9486	5.4502	KIRP	II	496	0	NA	36	8	None	Not amplified
TCGA-A4-A5XZ-01	5.1684	6.1828	KIRP	III	479	0	NA	128	24	None	Not amplified
TCGA-A4-A5Y0-01	6.2185	4.1473	KIRP	III	252	0	NA	60	21	None	Not amplified
TCGA-A4-A5Y1-01	3.7942	6.2981	KIRP	II	395	1	NA	77	24	None	Not amplified
TCGA-A4-A6HP-01	2.1445	7.3895	KIRP	IV	379	0	NA	197	36	None	Not amplified
TCGA-A4-A772-01	4.4253	6.941	KIRP	II	NA	NA	NA	NA	NA	None	Not amplified
TCGA-A4-A7UZ-01	4.459	9.877	KIRP	IV	NA	NA	NA	NA	NA	None	Not amplified
TCGA-A5-A1OH-01	0	7.1573	UCEC	IV	539	0	MSS	NA	NA	None	Not amplified
TCGA-A5-A2K2-01	2.5978	2.8206	UCEC	II	2769	0	MSS	NA	NA	None	Not amplified
TCGA-A5-A2K3-01	5.5047	12.315	UCEC	I	1409	0	MSI-H	NA	NA	None	Not amplified
TCGA-A5-A2K4-01	3.6855	6.4918	UCEC	II	871	1	MSI-L	NA	NA	None	Not amplified
TCGA-A5-A2K5-01	1.418	6.284	UCEC	II	162	0	MSS	NA	NA	None	Not amplified
TCGA-A5-A2K7-01	2.9134	5.3292	UCEC	II	157	0	MSI-H	NA	NA	None	Not amplified
TCGA-A5-A3LO-01	4.2772	4.9598	UCEC	II	223	0	MSS	NA	NA	None	Not amplified
TCGA-A5-A3LP-01	2.4256	7.3699	UCEC	IV	455	0	MSS	NA	NA	None	Not amplified
TCGA-A5-A7WJ-01	1.9549	4.937	UCEC	II	NA	NA	MSI-H	NA	NA	None	Not amplified
TCGA-A5-A7WK-01	3.29	5.1368	UCEC	II	NA	NA	MSS	NA	NA	None	Not amplified
TCGA-A5-AB3J-01	4.7442	7.112	UCEC	IV	NA	NA	MSS	NA	NA	NA	Not amplified
TCGA-A6-2675-01	5.3356	6.288	COAD	III	846	0	NA	21	NA	None	Not amplified
TCGA-A6-2682-01	4.4995	4.7127	COAD	II	424	1	MSS	NA	NA	None	Not amplified
TCGA-A6-2684-01	5.5083	6.92	COAD	III	387	0	MSI-L	NA	NA	None	Not amplified
TCGA-A6-2685-01	4.2118	6.5484	COAD	II	464	0	MSS	NA	NA	None	Not amplified
TCGA-A6-2686-01	6.822	9.5562	COAD	I	488	0	MSI-H	NA	NA	None	Not amplified
TCGA-A6-4105-01	6.0241	8.46	COAD	I	442	1	MSS	54	NA	None	Not amplified
TCGA-A6-5656-01	2.8246	4.8683	COAD	II	462	0	MSS	37	NA	None	Not amplified
TCGA-A6-5657-01	4.3356	7.3653	COAD	IV	367	0	MSS	29	NA	None	Not amplified
TCGA-A6-5659-01	3.3744	4.6353	COAD	II	286	0	MSS	64	NA	None	Not amplified
TCGA-A6-5660-01	3.1263	5.0724	COAD	II	342	0	MSS	37	NA	None	Not amplified
TCGA-A6-5661-01	5.0772	6.2073	COAD	III	306	0	MSI-H	439	NA	None	Not amplified
TCGA-A6-5662-01	3.0634	3.7138	COAD	II	453	0	MSS	32	NA	None	Not amplified
TCGA-A6-5664-01	5.013	6.7604	COAD	III	362	0	MSS	15	NA	None	Not amplified
TCGA-A6-5665-01	4.9332	8.2166	COAD	I	404	0	MSI-H	791	NA	None	Not amplified
TCGA-A6-5666-01	2.9303	4.311	COAD	II	362	0	MSI-L	46	NA	None	Not amplified
TCGA-A6-5667-01	3.5877	5.7434	COAD	II	320	0	MSS	62	NA	None	Not amplified
TCGA-A6-6137-01	4.9755	5.8976	COAD	III	348	0	MSS	43	NA	None	Not amplified
TCGA-A6-6138-01	6.5591	8.9182	COAD	I	280	0	MSS	43	NA	None	Not amplified
TCGA-A6-6140-01	3.7214	6.9413	COAD	II	356	0	MSS	143	NA	None	Not amplified
TCGA-A6-6141-01	3.8612	8.5244	COAD	IV	255	0	MSS	420	NA	None	Not amplified
TCGA-A6-6142-01	4.739	3.6649	COAD	II	368	0	MSS	30	NA	None	Not amplified
TCGA-A6-6648-01	4.6226	6.4746	COAD	II	344	0	MSS	31	NA	None	Not amplified
TCGA-A6-6649-01	4.8291	7.2912	COAD	I	328	0	MSS	54	NA	None	Not amplified
TCGA-A6-6650-01	3.1315	4.1449	COAD	II	278	0	MSS	49	NA	None	Not amplified
TCGA-A6-6651-01	5.35	7.9401	COAD	I	259	0	MSS	47	NA	None	Not amplified
TCGA-A6-6652-01	2.8365	4.9466	COAD	II	456	0	MSS	29	NA	None	Not amplified
TCGA-A6-6653-01	4.0999	5.1421	COAD	II	282	0	MSI-H	420	NA	None	Not amplified
TCGA-A6-6654-01	6.4243	8.0761	COAD	I	399	0	MSS	57	NA	None	Not amplified
TCGA-A6-6780-01	6.6979	8.4098	COAD	I	354	0	MSI-H	482	NA	None	Not amplified
TCGA-A6-6781-01	6.0763	7.7467	COAD	I	293	0	MSI-H	751	NA	None	Not amplified
TCGA-A6-6782-01	4.3814	7.8389	COAD	IV	189	0	MSS	58	NA	None	Not amplified
TCGA-A6-A565-01	4.8443	8.8564	COAD	I	494	1	MSI-L	NA	NA	None	Not amplified
TCGA-A6-A566-01	5.2399	6.6902	COAD	III	758	1	MSI-L	NA	NA	None	Not amplified
TCGA-A6-A567-01	3.6297	5.5396	COAD	II	1881	1	MSS	NA	NA	None	Not amplified
TCGA-A6-A56B-01	2.5251	2.1913	COAD	II	1711	1	MSS	NA	NA	None	Not amplified
TCGA-A6-A5ZU-01	4.0915	6.4582	COAD	II	293	0	MSS	NA	NA	None	Not amplified
TCGA-A7-A0CD-01	3.931	6.0915	BRCA	II	1165	0	NA	27	7	None	Not amplified
TCGA-A7-A0CE-01	5.1111	6.5213	BRCA	III	1074	0	NA	173	18	None	Amplified
TCGA-A7-A0CG-01	5.0002	8.796	BRCA	I	1043	0	NA	28	6	None	Not amplified
TCGA-A7-A0CH-01	3.816	5.8504	BRCA	II	1079	0	NA	43	9	None	Not amplified
TCGA-A7-A0CJ-01	5.0804	7.3479	BRCA	I	931	0	NA	38	8	None	Not amplified
TCGA-A7-A0D9-01	2.9235	4.9757	BRCA	II	1139	0	NA	40	8	None	Not amplified
TCGA-A7-A0DA-01	3.975	5.476	BRCA	II	1085	0	NA	110	24	None	Amplified
TCGA-A7-A0DB-01	4.5376	5.5303	BRCA	II	1007	0	NA	94	3	None	Not amplified
TCGA-A7-A0DC-01	3.7237	3.9684	BRCA	II	906	0	NA	1	NA	NA	NA
TCGA-A7-A13D-01	3.0552	4.1748	BRCA	II	965	0	NA	160	23	None	Not amplified
TCGA-A7-A13E-01	3.1188	7.2776	BRCA	IV	614	1	NA	222	NA	None	Not amplified
TCGA-A7-A13F-01	3.1094	5.1675	BRCA	II	765	0	NA	59	6	None	Not amplified
TCGA-A7-A13G-01	3.6824	3.7985	BRCA	II	718	0	NA	17	3	None	Not amplified
TCGA-A7-A13H-01	5.8208	8.3963	BRCA	I	740	0	NA	22	NA	None	Not amplified
TCGA-A7-A26E-01	3.7524	6.0568	BRCA	II	954	0	NA	272	5	None	Not amplified
TCGA-A7-A26F-01	7.1518	6.9744	BRCA	III	738	0	NA	80	6	None	Not amplified
TCGA-A7-A26G-01	5.459	8.1954	BRCA	I	722	0	NA	36	7	None	Not amplified
TCGA-A7-A26H-01	4.7041	7.6734	BRCA	IV	724	0	NA	76	19	None	Not amplified
TCGA-A7-A26I-01	5.4824	4.8687	BRCA	III	661	0	NA	31	7	None	Not amplified
TCGA-A7-A26J-01	5.1432	5.8403	BRCA	III	627	0	NA	166	3	None	Not amplified
TCGA-A7-A2KD-01	4.924	7.5326	BRCA	I	679	0	NA	31	NA	None	Not amplified
TCGA-A7-A3IY-01	3.9042	6.4242	BRCA	II	345	0	NA	12	NA	None	Not amplified
TCGA-A7-A3IZ-01	3.3889	5.9443	BRCA	II	322	0	NA	70	NA	None	Not amplified
TCGA-A7-A3J0-01	4.8393	7.9874	BRCA	I	313	0	NA	34	NA	None	Not amplified
TCGA-A7-A3J1-01	5.9712	9.2028	BRCA	I	343	0	NA	19	NA	None	Not amplified
TCGA-A7-A3RF-01	2.4389	5.5832	BRCA	II	408	0	NA	47	NA	None	Not amplified
TCGA-A7-A425-01	2.5906	6.0895	BRCA	II	447	0	NA	35	NA	None	Not amplified
[truncated: 7,681 more rows]
