# Supplementary material for: Pan-Cancer Immunogenomic Perspective on the Tumor Microenvironment Based on PD-L1 and CD8 T-Cell Infiltration
Source: Oxford University Press journal article supplement (doi:10.1158/1078-0432.ccr-15-2834), 2016-01-27
Supplement: 10780432ccr152834-sup-158558_1_supp_0_l2pmn0.xlsx [file 10780432ccr152834-sup-158558_1_supp_0_l2pmn0.xlsx]

## Sheet: supplementary table 3b
Supplementary table 3b. Specific amplification of cancer driver genes to predict tumor microenvironment immune types (TMIT).
Gene	TMIT I OR	TMIT I P value	TMIT I FDR	TMIT II OR	TMIT II P value	TMIT II FDR	TMIT III OR	TMIT III P value	TMIT III FDR	TMIT IV OR	TMIT IV P value	TMIT IV FDR
CD274	3.4574	2.05e-14	7.43e-12	0.210917	3.32e-10	1.11e-07	1.43735	0.0736223	0.313544	0.268814	0.000282619	0.0146154
PIGZ	1.66555	4.94e-10	8.94e-08	0.553249	6.12e-10	1.11e-07	1.50311	5.57e-05	0.00335854	0.569941	3.63e-05	0.00325955
DIAPH1	3.08711	1.16e-09	1.4e-07	0.246175	2.82e-07	1.46e-05	0.583055	0.086662	0.333741	1.11841	0.658366	0.936634
MUC4	1.63947	2.03e-09	1.65e-07	0.571353	4.61e-09	5.56e-07	1.47558	0.000137717	0.00553928	0.576442	5.28e-05	0.00325955
NPM1	2.54404	2.27e-09	1.65e-07	0.369673	1.54e-06	5.57e-05	0.646629	0.0888858	0.336623	1.03141	0.888093	0.965238
APC	3.32602	6.1e-09	3.68e-07	0.437443	0.00162817	0.0143688	0.313673	0.00786427	0.0748143	0.757892	0.389105	0.799268
CDX1	2.72932	1.69e-08	8.75e-07	0.349798	1.17e-05	0.000302077	0.589605	0.0801349	0.322321	1.01951	0.93872	0.972242
C3orf70	1.57334	2.84e-08	1.29e-06	0.59575	3.01e-08	2.73e-06	1.55761	8.13e-06	0.000736042	0.536303	5.91e-06	0.000713713
PIK3CA	1.52874	5.26e-08	2.12e-06	0.615217	3.87e-08	2.8e-06	1.55572	3.18e-06	0.000383902	0.547545	3.46e-06	0.000626003
TBL1XR1	1.4579	2.06e-06	7.45e-05	0.643909	7.47e-07	3.32e-05	1.59409	1.06e-06	0.000191639	0.538976	3.05e-06	0.000626003
NSD1	1.87389	1.6e-05	0.000528137	0.515633	0.000175299	0.0026441	0.68308	0.100453	0.353049	1.18835	0.373215	0.799268
TM4SF1	1.51102	4.03e-05	0.00121575	0.585957	4.03e-06	0.000118542	1.65123	2.61e-05	0.00189131	0.543375	0.000335636	0.0151875
FOXA1	1.86474	0.00010496	0.00292273	0.606969	0.00797204	0.0412268	0.862798	0.532637	0.829395	0.780552	0.314357	0.794849
ZNF706	0.712371	0.000126667	0.00327524	1.48928	8.26e-07	3.32e-05	0.799156	0.0583359	0.267311	1.05417	0.630295	0.926926
IL7R	1.5335	0.000140168	0.00338271	0.637464	0.000427673	0.00516058	1.2739	0.0919058	0.336623	0.692205	0.0365607	0.502569
SLC1A3	1.49491	0.000256925	0.00581293	0.667308	0.00108506	0.0122748	1.27411	0.0844985	0.328908	0.675333	0.0235404	0.431503
ACO1	1.96746	0.00114536	0.0230802	0.580733	0.0279096	0.104157	1.17724	0.555699	0.829395	0.463383	0.0458143	0.502569
FGFR3	0.487886	0.00117387	0.0230802	1.9346	0.000259918	0.00376361	0.895945	0.676408	0.901759	0.97476	0.92086	0.967606
RYBP	2.56991	0.00121662	0.0230802	0.696003	0.280805	0.484054	0.529021	0.217156	0.549706	0.393409	0.106073	0.645791
TRAT1	1.72785	0.00127515	0.0230802	0.551096	0.00321272	0.0225525	1.39117	0.120617	0.40429	0.570757	0.0524088	0.51026
2015-09-12	0.474542	0.00148213	0.0255491	1.22291	0.31019	0.515137	1.23868	0.389887	0.730421	1.58854	0.0453453	0.502569
RAD21	0.767967	0.00169279	0.0278541	1.51251	1.01e-07	6.12e-06	0.751421	0.0137819	0.105449	0.959443	0.702667	0.95987
PRKRIR	0.616615	0.0020969	0.0330034	1.25058	0.112127	0.270444	0.874138	0.498472	0.826122	1.55483	0.00790179	0.317828
RGS2	0.672882	0.00231713	0.0349501	1.54795	0.00016874	0.0026441	0.558233	0.00273303	0.0380521	1.35714	0.0369111	0.502569
RIMS2	0.769469	0.00258403	0.0374167	1.4042	2.69e-05	0.000540741	0.755894	0.019572	0.141701	1.09062	0.421838	0.799555
SLC17A8	0.301777	0.0039336	0.0547678	1.67126	0.0903379	0.230935	0.714247	0.478104	0.808756	2.14848	0.0216903	0.431503
ACVR1B	0.401072	0.00454355	0.0562348	2.19384	0.0016116	0.0143688	0.804218	0.565589	0.829395	1.06302	0.859989	0.965238
EGFR	0.712773	0.00452237	0.0562348	0.807608	0.0685113	0.188823	3.04227	2.95e-24	1.07e-21	0.45681	5.4e-05	0.00325955
RPS2	0.524183	0.00466034	0.0562348	1.35293	0.121243	0.279554	0.866025	0.606559	0.851064	1.6559	0.0264961	0.435981
SMARCA4	0.579514	0.00460535	0.0562348	1.53042	0.0105066	0.0513973	0.854015	0.514452	0.829395	1.24789	0.302011	0.794849
GFER	0.530511	0.00557629	0.0640511	1.32245	0.154842	0.325611	0.875449	0.634193	0.873315	1.67607	0.0231967	0.431503
POLE	0.409161	0.00566198	0.0640511	1.99061	0.00632122	0.0357544	0.940433	0.865337	0.964078	1.084	0.816181	0.965238
KEAP1	0.589572	0.0069819	0.0765893	1.7015	0.00158572	0.0143688	0.692392	0.166369	0.484145	1.19421	0.424289	0.799961
TIMM17A	0.717507	0.00755306	0.0804178	1.42075	0.00193095	0.0162451	0.556003	0.00182255	0.0263905	1.43322	0.00977353	0.332976
GNPTAB	0.300359	0.00815971	0.0843948	2.14948	0.0191389	0.0805615	0.876308	0.784346	0.957236	1.33536	0.491803	0.851831
MBD6	0.594059	0.00995007	0.0973493	1.46528	0.0300051	0.110835	1.08849	0.718564	0.927719	1.04603	0.851106	0.965238
USO1	1.7193	0.00973944	0.0973493	0.476347	0.00412715	0.026211	1.17724	0.555699	0.829395	0.932252	0.815839	0.965238
AZGP1	1.42919	0.0107632	0.1017	0.721729	0.0355181	0.127464	1.12121	0.536739	0.829395	0.772424	0.220783	0.791322
FAT1	2.41062	0.0109566	0.1017	0.535785	0.138638	0.304163	0.561414	0.335077	0.689193	0.788759	0.656843	0.936634
IL32	0.545137	0.0114089	0.10325	1.29266	0.216483	0.416844	0.994284	0.983799	0.986524	1.53459	0.0821757	0.602936
ETHE1	1.6206	0.0120935	0.106777	0.668102	0.0658091	0.187582	0.741529	0.312441	0.661425	1.03261	0.90391	0.965238
ELF3	0.739899	0.0137972	0.118919	1.36866	0.00529837	0.0319668	0.582543	0.00321652	0.041585	1.42197	0.0108826	0.332976
CDK4	0.699715	0.0190649	0.15585	1.19807	0.198506	0.39483	0.963579	0.846062	0.964078	1.3205	0.109201	0.645791
COL5A3	0.612551	0.0193736	0.15585	1.55448	0.0157855	0.0688477	0.708413	0.225286	0.562437	1.30162	0.257604	0.794849
XPO1	1.58235	0.0188751	0.15585	0.504762	0.00380579	0.025049	1.44757	0.123568	0.40665	0.778764	0.399787	0.799268
EZH1	0.465417	0.0203911	0.157055	1.28001	0.370128	0.568176	1.06391	0.865443	0.964078	1.71675	0.0861357	0.611395
MED12	0.413868	0.0199804	0.157055	2.5345	0.00159096	0.0143688	1.02852	0.945741	0.985781	0.551293	0.249944	0.794849
C1QL2	1.87558	0.0242515	0.172138	0.820791	0.522641	0.698141	0.602605	0.27846	0.612047	0.612587	0.294685	0.794849
CREBBP	0.595903	0.023395	0.172138	1.21997	0.327487	0.531616	0.853653	0.583608	0.838357	1.69016	0.0238399	0.431503
SACS	0.510926	0.0237449	0.172138	2.39554	0.00032064	0.0044499	0.550935	0.158982	0.467898	0.887311	0.739878	0.965238
SMAP1	1.87558	0.0242515	0.172138	0.744437	0.348242	0.551876	0.345613	0.061948	0.280315	1.05276	0.894267	0.965238
CIC	1.5834	0.0259833	0.180201	0.811687	0.356372	0.558471	0.718269	0.302196	0.653382	0.806986	0.488897	0.851831
TCP11L2	0.407545	0.026383	0.180201	2.02442	0.024985	0.098141	0.798682	0.638773	0.873315	1.20971	0.648526	0.935324
HIF1A	1.87531	0.0272896	0.182941	0.272516	0.00143368	0.0143688	1.81866	0.0696643	0.30067	0.788463	0.586033	0.913045
MYD88	0.453083	0.0291216	0.18825	2.29237	0.00404248	0.0261318	0.975528	0.951991	0.985781	0.672693	0.400473	0.799268
POU2F2	1.55905	0.0290863	0.18825	0.776014	0.258813	0.459266	0.765464	0.386807	0.729292	0.853802	0.597271	0.913045
BRCA1	0.53697	0.0315939	0.193795	1.00215	0.993354	0.993354	1.18753	0.590677	0.841831	1.88918	0.0219325	0.431503
CXCL9	1.59155	0.0321208	0.193795	0.44177	0.00255826	0.0197159	1.26336	0.401012	0.736885	1.0904	0.768306	0.965238
EAF1	0.555066	0.0312518	0.193795	2.68178	1.44e-05	0.000326425	0.565824	0.147317	0.45194	0.575212	0.159699	0.722636
ZNF180	1.48626	0.0312395	0.193795	0.787087	0.234956	0.433502	0.774206	0.355197	0.707621	0.91091	0.723058	0.965238
IRF6	0.765075	0.0347953	0.20649	1.24992	0.0598488	0.17614	0.66672	0.0266641	0.173944	1.44015	0.0110379	0.332976
PBRM1	0.372814	0.0362457	0.211628	2.88628	0.00294875	0.0222385	0.186881	0.0645775	0.288606	1.38296	0.476499	0.851831
B2M	0.155481	0.0397069	0.224592	3.07258	0.0382639	0.133977	1.63203	0.452812	0.788067	0.460077	0.444644	0.825442
ERBB2	0.782031	0.0392952	0.224592	1.06868	0.560769	0.719853	1.14226	0.358416	0.707621	1.16191	0.300134	0.794849
CCND1	1.1869	0.0421294	0.231073	0.833788	0.040516	0.134558	1.03701	0.745617	0.937199	0.964336	0.752405	0.965238
NTN4	0.51978	0.0418309	0.231073	2.31283	0.00149243	0.0143688	0.204028	0.0145357	0.107386	1.38431	0.334404	0.794849
ALPK2	0.479131	0.0444818	0.233368	2.5345	0.00159096	0.0143688	0.396495	0.109526	0.381235	1.04557	0.914107	0.967606
CCDC101	0.628531	0.0437929	0.233368	1.4181	0.0861234	0.224293	0.820074	0.506362	0.826122	1.31648	0.282925	0.794849
CNBD1	0.810031	0.0440915	0.233368	1.32008	0.00474487	0.0291126	0.683707	0.011612	0.0955355	1.20618	0.138734	0.695071
STK11	0.538057	0.0460636	0.238215	1.79627	0.0242834	0.0966001	1.13336	0.719512	0.927719	0.757209	0.489964	0.851831
FAM166A	0.629004	0.0485756	0.247667	1.52612	0.0404079	0.134558	1.27408	0.356628	0.707621	0.721434	0.308409	0.794849
CHD8	1.54278	0.0500856	0.251819	0.940639	0.795399	0.90547	0.668107	0.252043	0.584869	0.679206	0.272216	0.794849
FLT3	0.620399	0.051227	0.25403	1.76038	0.00757648	0.0403336	0.774832	0.429311	0.769013	0.957356	0.885193	0.965238
RSBN1L	1.48726	0.0544894	0.263002	0.609621	0.0376789	0.133723	1.36368	0.227642	0.563098	0.721434	0.308409	0.794849
TCAP	0.791159	0.0544553	0.263002	1.07906	0.514257	0.695025	1.06197	0.691573	0.907063	1.20704	0.198612	0.76262
XCL1	0.805898	0.0556034	0.264848	1.45472	0.000344191	0.0044499	0.582658	0.00161082	0.0253529	1.14635	0.323196	0.794849
BRAF	0.713742	0.0608724	0.275448	1.11715	0.509532	0.693423	1.20232	0.381372	0.724181	1.1687	0.465426	0.85093
OR52N1	0.266532	0.0603506	0.275448	1.49218	0.4245	0.617144	2.47587	0.0825265	0.327066	0.789054	0.753611	0.965238
RHOA	0.266532	0.0603506	0.275448	4.22876	0.00364172	0.024413	0.776235	0.737089	0.929709	0.367927	0.313253	0.794849
VHL	0.666136	0.0600589	0.275448	1.93312	0.000474415	0.00553994	0.726053	0.27869	0.612047	0.73815	0.304485	0.794849
ARID5B	0.620633	0.0631653	0.279937	1.42148	0.119828	0.278451	0.865552	0.657514	0.89146	1.27801	0.39307	0.799268
ZRANB3	1.87342	0.0634112	0.279937	0.916604	0.81253	0.907827	0.93698	0.893246	0.964078	0.166858	0.044632	0.502569
ANK3	0.630629	0.0665051	0.284001	1.79327	0.0073081	0.0394855	0.742854	0.378047	0.72409	0.933319	0.825735	0.965238
PDAP1	1.29274	0.0663668	0.284001	0.840254	0.24332	0.438218	1.01584	0.933764	0.982624	0.819414	0.329682	0.794849
PTPN11	0.563269	0.0666853	0.284001	1.79158	0.0275632	0.104157	0.650849	0.317621	0.668481	1.20259	0.597767	0.913045
INPPL1	0.759905	0.0684907	0.288298	0.971226	0.840824	0.927983	1.73951	0.000526571	0.0158849	0.849282	0.417298	0.799268
CASP8	1.53872	0.0698568	0.290668	0.649135	0.111632	0.270444	0.787746	0.504018	0.826122	1.12486	0.711245	0.965238
CEBPA	1.26672	0.0723694	0.297702	0.82068	0.159728	0.330409	1.05705	0.751467	0.941283	0.852665	0.399409	0.799268
RPS15	0.559041	0.0738503	0.30038	1.78121	0.0355631	0.127464	1.29626	0.461137	0.791145	0.586371	0.251806	0.794849
ATP5B	0.641073	0.0775779	0.30197	1.04944	0.835226	0.924623	1.76397	0.0262545	0.173944	0.946773	0.861613	0.965238
MRPS25	0.641073	0.0775779	0.30197	2.35058	7.88e-05	0.00135776	0.504954	0.0787853	0.320453	0.679206	0.272216	0.794849
NKIRAS2	0.594586	0.0770953	0.30197	1.38774	0.202643	0.398677	1.04565	0.897498	0.964078	1.19324	0.596059	0.913045
PRDM1	1.49188	0.0768161	0.30197	0.738152	0.226481	0.428442	0.610335	0.182447	0.515982	1.19197	0.552618	0.913045
CCDC36	0.287082	0.0800009	0.308089	5.28681	0.00142458	0.0143688	0.836044	0.813525	0.95927	7.08e-06	0.0991761	0.645791
ALB	1.4	0.0814326	0.308415	0.856141	0.453717	0.646636	0.924401	0.772516	0.953406	0.73815	0.304485	0.794849
SLC22A14	0.554108	0.0817896	0.308415	2.09235	0.00917527	0.0461312	0.927705	0.854747	0.964078	0.641242	0.344008	0.794849
AJUBA	1.43433	0.089958	0.310182	0.958176	0.849194	0.929529	0.834906	0.56183	0.829395	0.611501	0.158845	0.722636
ATM	0.592895	0.0857312	0.310182	1.45593	0.15561	0.325611	1.73664	0.0697688	0.30067	0.519594	0.155134	0.722636
C19orf33	1.2493	0.0899698	0.310182	0.660051	0.0043762	0.0273135	1.53282	0.00600297	0.063914	0.784697	0.210779	0.770728
CD70	0.57347	0.0887245	0.310182	1.34425	0.298189	0.502068	1.4986	0.233295	0.563098	0.878455	0.750593	0.965238
KRAS	1.23549	0.0879655	0.310182	0.890282	0.371983	0.568176	0.985812	0.932331	0.982624	0.837122	0.319642	0.794849
NF1	0.679233	0.084953	0.310182	1.36957	0.119995	0.278451	1.10127	0.718304	0.927719	0.963356	0.894425	0.965238
PTPN12	1.41532	0.0857997	0.310182	0.636211	0.0493388	0.152941	1.36394	0.215667	0.549706	0.75139	0.35351	0.794849
SELP	0.823593	0.0888439	0.310182	1.40695	0.0013663	0.0143688	0.604425	0.00338707	0.0422799	1.1473	0.327395	0.794849
TMEM30B	1.64898	0.084759	0.310182	0.391742	0.0124475	0.0570599	1.87086	0.0579706	0.267311	0.656593	0.371304	0.799268
CDKN2A	1.63938	0.0956261	0.32352	0.696003	0.280805	0.484054	1.17626	0.677668	0.901759	0.537779	0.22965	0.794849
TGFBR2	0.59094	0.0954035	0.32352	2.23503	0.0025598	0.0197159	1.08769	0.818456	0.961952	0.323612	0.0456538	0.502569
TP53BP1	0.20741	0.098873	0.331408	1.91856	0.294748	0.498634	2.33236	0.20661	0.545934	0.613668	0.640056	0.930523
CNKSR1	0.414588	0.100346	0.333259	2.30544	0.0449739	0.144076	0.258335	0.154205	0.461341	1.62732	0.33459	0.794849
BHMT2	2.07983	0.103637	0.341059	0.684199	0.464127	0.651218	1.45077	0.506627	0.826122	2.6e-06	0.0634301	0.51026
C3orf62	0.311057	0.106013	0.345737	4.80469	0.00337987	0.0230852	0.905827	0.897006	0.964078	7.08e-06	0.111192	0.645791
MYCN	0.691697	0.108159	0.349586	1.49762	0.0494313	0.152941	0.850043	0.587327	0.840364	1.02347	0.934563	0.972242
MAP2K4	0.564992	0.109594	0.34993	1.67126	0.0903379	0.230935	1.05722	0.893094	0.964078	0.895581	0.802476	0.965238
SMAD2	1.5507	0.110199	0.34993	0.686836	0.226407	0.428442	0.692657	0.395408	0.730421	1.13102	0.737111	0.965238
FKBP2	0.605814	0.113568	0.354358	1.36303	0.266201	0.465701	1.11255	0.771243	0.953406	1.13102	0.737111	0.965238
SSX5	0.704607	0.11453	0.354358	1.04623	0.828292	0.91976	1.01143	0.966903	0.985781	1.52758	0.0783862	0.591163
UBXN4	1.75554	0.113325	0.354358	0.783676	0.537532	0.710169	0.804762	0.685038	0.901759	0.591156	0.382007	0.799268
ALKBH6	1.24749	0.117763	0.360635	0.74709	0.0573334	0.17012	1.3043	0.13052	0.418126	0.798284	0.277752	0.794849
BAP1	0.466401	0.118551	0.360635	4.09028	0.000374293	0.00467221	0.225957	0.110819	0.382063	0.479748	0.308712	0.794849
ADNP	0.809824	0.124219	0.371631	1.57314	0.000336459	0.0044499	0.658051	0.0372042	0.204059	0.8975	0.552387	0.913045
RBM10	0.721543	0.12331	0.371631	1.08109	0.695047	0.831585	0.982859	0.948008	0.985781	1.45138	0.112389	0.645791
LZTR1	0.744575	0.125521	0.372447	1.23455	0.238473	0.433806	1.32667	0.19851	0.544399	0.807481	0.412336	0.799268
CCDC120	0.708285	0.127092	0.374044	1.06579	0.763693	0.883249	1.22584	0.437111	0.771874	1.24631	0.400633	0.799268
ACVR2B	0.582744	0.132134	0.379624	2.1165	0.0132462	0.059939	1.08757	0.839685	0.964078	0.42383	0.140166	0.695071
CDK12	0.822676	0.130341	0.379624	1.14243	0.280526	0.484054	0.891998	0.503749	0.826122	1.21503	0.210726	0.770728
SOX17	0.826665	0.132114	0.379624	1.36825	0.00813234	0.0414635	0.728958	0.0777296	0.320453	1.04571	0.780098	0.965238
IDH2	1.29716	0.136415	0.379862	0.787928	0.206714	0.40449	1.15708	0.519326	0.829395	0.780166	0.339903	0.794849
PPP2R4	0.648319	0.133519	0.379862	1.48299	0.122946	0.281687	1.04565	0.897498	0.964078	0.937892	0.859277	0.965238
RPSA	0.552644	0.135573	0.379862	2.03571	0.032243	0.117899	1.12515	0.792934	0.95927	0.517	0.266539	0.794849
STX2	0.62145	0.134735	0.379862	2.07959	0.00718728	0.0394211	0.707804	0.424698	0.764879	0.719536	0.447282	0.826102
GZMA	1.60523	0.137941	0.381179	0.958398	0.90066	0.947788	0.798682	0.638773	0.873315	0.459323	0.184899	0.76262
EPHA2	0.636593	0.142233	0.384242	1.85586	0.0202882	0.0844176	0.924819	0.838503	0.964078	0.675226	0.361958	0.798955
NBPF1	0.603298	0.141767	0.384242	2.01152	0.0171023	0.0728357	0.387006	0.0996348	0.353049	1.19578	0.647045	0.935324
TXLNA	0.636593	0.142233	0.384242	1.6023	0.0799436	0.211238	1.06391	0.865443	0.964078	0.804841	0.591786	0.913045
SMAD4	0.491029	0.148887	0.399238	1.62433	0.232536	0.431682	1.08739	0.878576	0.964078	1.10538	0.855016	0.965238
CSNK2A1	0.716627	0.156755	0.411199	1.28124	0.250703	0.447281	1.46065	0.142556	0.448742	0.688509	0.26488	0.794849
DDX3X	0.662835	0.156025	0.411199	1.00654	0.980772	0.99257	1.33396	0.371292	0.721138	1.35615	0.34436	0.794849
IDH1	1.51277	0.156536	0.411199	0.898181	0.732007	0.857561	0.794627	0.598967	0.846977	0.656593	0.371304	0.799268
GPATCH4	0.858987	0.160368	0.415166	1.37204	0.00197454	0.0162451	0.574362	0.000889484	0.0214662	1.16185	0.26169	0.794849
MUC17	1.23977	0.160562	0.415166	0.85637	0.338985	0.542976	1.12607	0.551334	0.829395	0.760859	0.231929	0.794849
HIST1H3B	0.753885	0.165655	0.422304	2.29804	4.26e-06	0.000118542	0.339617	0.00374363	0.0437159	0.681214	0.191159	0.76262
HIST1H3C	0.753885	0.165655	0.422304	2.29804	4.26e-06	0.000118542	0.339617	0.00374363	0.0437159	0.681214	0.191159	0.76262
CTNNB1	0.599605	0.177968	0.447392	1.63292	0.13417	0.297973	1.05229	0.909199	0.969129	0.862873	0.759305	0.965238
EZH2	0.772667	0.177425	0.447392	1.08387	0.657853	0.812774	1.52622	0.0445274	0.23027	0.807481	0.412336	0.799268
AKT1	1.31535	0.185019	0.46191	1.13291	0.554603	0.719853	0.994284	0.983799	0.986524	0.361645	0.0120106	0.334448
BRCA2	0.726617	0.193823	0.470717	1.74788	0.0109279	0.0527456	0.504954	0.0787853	0.320453	1.0414	0.893757	0.965238
CAP2	0.802523	0.196349	0.470717	1.8034	0.000138178	0.00227365	0.656858	0.09206	0.336623	0.667846	0.105856	0.645791
CUX1	1.22217	0.192196	0.470717	0.86342	0.365773	0.568176	1.13378	0.528917	0.829395	0.765774	0.243356	0.794849
ING1	0.797974	0.193497	0.470717	1.42604	0.0271409	0.104157	1.05569	0.802091	0.95927	0.696602	0.149003	0.721259
MET	0.797974	0.193497	0.470717	1.21707	0.229607	0.428442	0.911165	0.682084	0.901759	1.12404	0.582977	0.913045
SLC25A15	0.66946	0.195918	0.470717	2.32854	0.0016671	0.0143688	0.692657	0.395408	0.730421	0.449522	0.114984	0.650378
C12orf39	1.2053	0.199842	0.47283	0.972287	0.851888	0.929529	0.909387	0.639305	0.873315	0.812867	0.327837	0.794849
ERBB3	0.760024	0.198887	0.47283	1.19342	0.376221	0.569841	1.17592	0.524051	0.829395	0.971184	0.914596	0.967606
NOTCH1	0.745522	0.206111	0.484495	1.20039	0.398461	0.586353	1.25169	0.405632	0.74161	0.920183	0.782212	0.965238
ITPKB	0.856189	0.208092	0.484537	1.26128	0.0478676	0.150679	0.565234	0.00290404	0.0389356	1.34697	0.0401157	0.502569
KDM6A	0.751069	0.209793	0.484537	1.03752	0.865335	0.929529	1.03244	0.910232	0.969129	1.40514	0.186114	0.76262
MLF2	0.825785	0.210145	0.484537	1.33979	0.0411403	0.135389	0.716078	0.125814	0.410311	1.10102	0.612429	0.921486
ASXL1	0.829978	0.212385	0.486604	1.45886	0.00660826	0.0368029	0.954739	0.811162	0.95927	0.692812	0.0913624	0.636023
BCOR	0.723053	0.229739	0.500996	0.797544	0.395989	0.586353	1.41324	0.248664	0.580751	1.56976	0.12184	0.678554
CBFB	1.46516	0.22321	0.500996	1.2281	0.521308	0.698141	0.754119	0.553769	0.829395	0.282355	0.0627552	0.51026
CDC27	0.723053	0.229739	0.500996	1.345	0.229219	0.428442	0.936762	0.849206	0.964078	1.06682	0.844858	0.965238
ERCC2	1.28059	0.223815	0.500996	1.01685	0.936677	0.974359	0.730687	0.307763	0.655355	0.814578	0.491391	0.851831
FRG1	1.54139	0.227864	0.500996	0.558201	0.169266	0.346183	1.58826	0.278345	0.612047	0.591156	0.382007	0.799268
KDM5C	0.745679	0.224645	0.500996	0.958202	0.854296	0.929529	1.2821	0.372522	0.721138	1.30349	0.341399	0.794849
MMD	0.824318	0.224364	0.500996	1.1046	0.514549	0.695025	0.825623	0.375736	0.723492	1.35414	0.101151	0.645791
SNX25	1.60411	0.226122	0.500996	0.85169	0.705688	0.83757	0.708408	0.572965	0.836344	0.720124	0.591533	0.913045
PAPD5	0.662009	0.237527	0.514878	1.58719	0.133763	0.297973	0.905567	0.822336	0.963384	0.920574	0.851419	0.965238
MGA	0.414947	0.24557	0.522919	3.36013	0.0401264	0.134558	1.20823	0.808676	0.95927	7.08e-06	0.158047	0.722636
RHEB	0.801382	0.243836	0.522919	1.04845	0.795708	0.90547	1.45835	0.0770639	0.320453	0.863134	0.563689	0.913045
ZNF492	0.745836	0.245182	0.522919	1.22581	0.384933	0.580608	1.31838	0.337681	0.690625	0.823462	0.567508	0.913045
GUSB	1.28562	0.253524	0.536701	0.435388	0.00208943	0.0168083	1.54864	0.091872	0.336623	1.26592	0.396321	0.799268
FAM8A1	0.822331	0.25723	0.538249	1.89174	4.93e-05	0.000892983	0.599568	0.0511258	0.246767	0.609584	0.0593177	0.51026
HIST1H2BN	0.792105	0.256633	0.538249	2.22988	1.34e-05	0.000323161	0.462597	0.0234147	0.166198	0.528003	0.0506897	0.51026
PIGB	0.533392	0.260212	0.538266	1.22048	0.680126	0.823431	1.5546	0.433366	0.769013	1.10531	0.874306	0.965238
SETD2	0.533392	0.260212	0.538266	2.40078	0.0569801	0.17012	0.679026	0.603825	0.850525	0.690248	0.619419	0.922755
SF3B1	1.28776	0.264418	0.54386	0.805762	0.375854	0.569841	0.944891	0.856776	0.964078	0.960616	0.898215	0.965238
PDSS2	1.25976	0.266451	0.544945	0.943254	0.787817	0.905364	0.622201	0.153038	0.461341	1.09248	0.747778	0.965238
CHD4	0.846429	0.269646	0.548382	1.30673	0.0606956	0.177192	0.80728	0.303227	0.653382	1.00473	0.980632	0.98608
IPO7	0.622147	0.273039	0.549111	1.06528	0.872808	0.934783	0.905698	0.854641	0.964078	1.84594	0.154657	0.722636
PDCD2L	1.16256	0.272729	0.549111	0.835151	0.213521	0.41334	1.18438	0.332221	0.687223	0.857672	0.431295	0.804788
HIST1H1E	0.802265	0.284573	0.566019	2.19263	2.22e-05	0.000472999	0.467105	0.0253595	0.17321	0.533197	0.0545617	0.51026
ZFP36L1	1.42599	0.283481	0.566019	0.810446	0.559055	0.719853	1.50228	0.306136	0.655355	0.314784	0.0933109	0.637331
HIST1H4E	0.805451	0.286738	0.566447	2.14809	2.9e-05	0.000552412	0.509434	0.0385068	0.208052	0.517908	0.0437069	0.502569
TMED10	1.35561	0.287918	0.566447	0.744437	0.348242	0.551876	1.91806	0.0406143	0.216212	0.229152	0.025818	0.435981
PTH2	0.746149	0.293539	0.568242	1.74986	0.025213	0.098141	0.677918	0.330479	0.687223	0.802599	0.561542	0.913045
SIRT4	0.746149	0.293539	0.568242	1.98883	0.00558865	0.0326305	0.570412	0.186138	0.518322	0.689163	0.351619	0.794849
SPEN	0.746149	0.293539	0.568242	1.98883	0.00558865	0.0326305	0.466766	0.09471	0.339456	0.802599	0.561542	0.913045
DIS3	0.786666	0.296822	0.571541	1.20039	0.398461	0.586353	1.85203	0.00998031	0.0840202	0.38747	0.0201507	0.431503
CCDC6	0.75407	0.299153	0.572981	1.60325	0.0549457	0.165753	0.643202	0.267056	0.608823	0.986591	0.968748	0.979572
TBX3	0.725607	0.307672	0.586196	1.77546	0.0404282	0.134558	0.602605	0.27846	0.612047	0.898997	0.794335	0.965238
BLOC1S3	1.22829	0.314173	0.59311	0.887989	0.580397	0.734628	0.801231	0.457007	0.791145	1.04053	0.884723	0.965238
C12orf57	0.85972	0.314578	0.59311	1.26985	0.0942524	0.237995	0.768148	0.211214	0.547602	1.0753	0.701855	0.95987
CDKN1A	0.815655	0.316712	0.594039	1.53624	0.0220961	0.0888752	0.63024	0.128519	0.415393	0.957996	0.871036	0.965238
ARID1A	0.653362	0.329474	0.602372	1.53571	0.265186	0.465701	0.434082	0.242885	0.570938	1.58113	0.31911	0.794849
ARL15	1.30469	0.327695	0.602372	1.06548	0.820622	0.914047	0.905437	0.79527	0.95927	0.540107	0.182664	0.76262
CYP7B1	0.886055	0.329328	0.602372	1.20446	0.118772	0.278451	0.692044	0.041875	0.219692	1.21416	0.200135	0.76262
LCTL	0.707898	0.327863	0.602372	1.27948	0.445051	0.636793	1.15378	0.731464	0.929088	0.974972	0.954455	0.976024
RB1	0.707898	0.327863	0.602372	1.57177	0.152334	0.322485	1.15378	0.731464	0.929088	0.612858	0.348881	0.794849
MICALCL	1.3475	0.3341	0.607759	0.83007	0.575193	0.730853	1.2438	0.578031	0.836989	0.5655	0.271898	0.794849
PPP6C	0.77059	0.339523	0.614536	1.28036	0.329642	0.532724	0.550935	0.158982	0.467898	1.52188	0.162876	0.727916
CD5L	0.903209	0.345659	0.622531	1.28188	0.0163786	0.070584	0.64824	0.00710368	0.0714315	1.11374	0.428457	0.803634
WASF3	0.799471	0.359949	0.64188	1.57501	0.0424908	0.137336	0.601781	0.169711	0.486069	0.974867	0.935486	0.972242
ZNF620	0.7	0.359767	0.64188	1.41443	0.323499	0.527508	1.2088	0.67457	0.901759	0.761464	0.608865	0.921486
SMC1A	0.804048	0.363094	0.644315	1.08597	0.719298	0.848162	0.918041	0.784947	0.957236	1.32311	0.315394	0.794849
APOL2	0.765568	0.368159	0.644601	1.72468	0.0417523	0.136165	0.924819	0.838503	0.964078	0.550979	0.198076	0.76262
CD300LG	0.77372	0.37394	0.644601	1.00907	0.973998	0.99257	0.998391	0.996469	0.996469	1.44514	0.255258	0.794849
CSAG1	1.14708	0.367201	0.644601	0.997483	0.987086	0.99257	1.16863	0.421392	0.762719	0.619867	0.0476757	0.507606
LPAR2	0.812311	0.368649	0.644601	1.24526	0.31367	0.516129	1.01481	0.959915	0.985781	0.944639	0.85018	0.965238
OTUD7A	0.717933	0.37187	0.644601	1.37112	0.349573	0.551876	1.55613	0.267411	0.608823	0.50127	0.243363	0.794849
XIRP2	0.77372	0.37394	0.644601	1.08868	0.756516	0.880575	1.57547	0.147115	0.45194	0.757209	0.489964	0.851831
AXIN2	1.12227	0.390374	0.669422	1.21579	0.14291	0.311648	0.561348	0.00809616	0.0748143	0.928005	0.686262	0.955487
RPL19	0.875438	0.392037	0.669422	1.05954	0.702811	0.836899	0.876542	0.528954	0.829395	1.26562	0.206684	0.770728
DHDH	0.758267	0.399743	0.66994	1.83953	0.0384906	0.133977	0.835592	0.68238	0.901759	0.537779	0.22965	0.794849
FGFR2	0.804865	0.3956	0.66994	1.12634	0.624868	0.780007	0.762934	0.447362	0.782342	1.43352	0.213635	0.773359
POU2AF1	0.758267	0.399743	0.66994	1.68195	0.0793079	0.211099	1.5569	0.214769	0.549706	0.124968	0.0144484	0.373595
SMARCB1	0.809679	0.398808	0.66994	1.11937	0.636641	0.791972	1.01936	0.951599	0.985781	1.14145	0.665283	0.936634
MYOCD	0.768543	0.406906	0.675688	1.25758	0.437765	0.633884	0.927705	0.854747	0.964078	1.10568	0.795836	0.965238
SERPINB13	0.768543	0.406906	0.675688	1.92404	0.0214216	0.0881208	0.775609	0.560251	0.829395	0.500921	0.177664	0.76262
ODAM	1.20896	0.411632	0.675863	0.995396	0.984547	0.99257	0.973345	0.931609	0.982624	0.708585	0.32993	0.794849
RNF43	0.887527	0.416346	0.675863	1.09995	0.504581	0.691888	0.974305	0.891738	0.964078	1.06415	0.739302	0.965238
TCEB1	0.912526	0.414761	0.675863	1.26782	0.0277675	0.104157	0.697205	0.0276956	0.173944	1.05825	0.694006	0.95987
TTLL9	0.890754	0.412321	0.675863	1.26321	0.0833331	0.218598	0.885419	0.521571	0.829395	0.900379	0.580595	0.913045
TXNDC8	0.777675	0.413252	0.675863	0.797861	0.462697	0.651218	1.01136	0.976657	0.985781	1.89842	0.0433033	0.502569
MPO	0.884389	0.419313	0.677641	1.13533	0.388579	0.583674	0.947001	0.785357	0.957236	1.041	0.836661	0.965238
COL5A1	0.799842	0.428386	0.683153	1.19312	0.507014	0.6926	1.22195	0.548844	0.829395	0.849226	0.667546	0.936634
RIT1	0.921501	0.426996	0.683153	1.30982	0.00626488	0.0357544	0.611261	0.00169719	0.0255993	1.0827	0.545009	0.913045
SLC26A3	0.870192	0.424956	0.683153	1.19421	0.287919	0.491636	1.10603	0.642309	0.87412	0.822214	0.416837	0.799268
MED23	0.805883	0.432384	0.686504	1.44156	0.150148	0.321618	0.570412	0.186138	0.518322	1.17015	0.63685	0.929595
SLC25A5	0.811398	0.435957	0.689155	0.71734	0.228768	0.428442	2.05141	0.00826677	0.0748143	0.986591	0.968748	0.979572
GNB1	0.829355	0.44684	0.697225	0.80028	0.37053	0.568176	1.76042	0.0308188	0.179942	1.00466	0.988222	0.988222
RPL5	1.27225	0.443756	0.697225	1.18068	0.601669	0.758899	1.08757	0.839685	0.964078	0.275262	0.0568412	0.51026
TNFRSF14	0.829355	0.44684	0.697225	0.80028	0.37053	0.568176	1.76042	0.0308188	0.179942	1.00466	0.988222	0.988222
BRE	0.836468	0.45068	0.698843	1.3069	0.229482	0.428442	0.732722	0.355855	0.707621	1.10612	0.73164	0.965238
CDH1	0.77249	0.451738	0.698843	1.35988	0.331519	0.533377	0.931559	0.872781	0.964078	0.946996	0.902113	0.965238
ATRX	0.782856	0.45868	0.700722	1.45974	0.21246	0.41334	0.857689	0.727079	0.929088	0.871903	0.755363	0.965238
EIF2S2	0.884949	0.455173	0.700722	1.20472	0.235911	0.433502	1.13523	0.53137	0.829395	0.754805	0.228859	0.794849
TPX2	0.904984	0.45876	0.700722	1.22821	0.112809	0.270444	0.97169	0.870577	0.964078	0.838619	0.344485	0.794849
FOXQ1	1.13618	0.462557	0.703553	1.56437	0.00782299	0.0410423	0.276299	0.000398496	0.0131141	0.793067	0.359883	0.798955
ITGB7	0.807216	0.474523	0.718733	1.59101	0.0905876	0.230935	0.564727	0.218668	0.549706	0.9822	0.962775	0.979002
LCE4A	1.07161	0.485821	0.73278	1.17873	0.0946719	0.237995	0.588043	0.000681096	0.0176112	1.03889	0.770749	0.965238
CD79B	1.09385	0.495589	0.741335	1.16237	0.250823	0.447281	0.636969	0.026948	0.173944	0.966706	0.849344	0.965238
SLC44A3	1.24713	0.493978	0.741335	1.27948	0.445051	0.636793	0.775764	0.595079	0.84478	0.446853	0.168629	0.735467
GPS2	1.36006	0.506927	0.742945	0.884615	0.80391	0.90547	1.94459	0.194293	0.536902	2.6e-06	0.0634301	0.51026
LMAN1	0.778017	0.504497	0.742945	1.70765	0.115815	0.275824	0.52506	0.278972	0.612047	0.952496	0.920084	0.967606
MUC7	1.1696	0.502347	0.742945	0.958229	0.859585	0.929529	0.988219	0.970005	0.985781	0.811249	0.537601	0.9094
TP53	1.36006	0.506927	0.742945	1.39526	0.471984	0.657147	1.01924	0.975862	0.985781	2.6e-06	0.0634301	0.51026
WT1	1.15694	0.505799	0.742945	0.705664	0.144139	0.312445	1.68862	0.0350104	0.194981	0.697313	0.282013	0.794849
RPTN	1.06622	0.510857	0.745687	1.19222	0.0684673	0.188823	0.618969	0.00147085	0.024509	0.990569	0.94211	0.972242
MAP2K1	0.800211	0.518323	0.749128	1.15099	0.667274	0.821609	1.15378	0.731464	0.929088	0.974972	0.954455	0.976024
OMA1	1.14915	0.519244	0.749128	0.881419	0.575395	0.730853	0.893538	0.708007	0.925266	1.07719	0.793229	0.965238
SPOP	0.899399	0.525631	0.749128	1.20704	0.241812	0.43768	0.656858	0.09206	0.336623	1.22352	0.321458	0.794849
STK19	1.11892	0.524541	0.749128	1.64889	0.00323959	0.0225525	0.32826	0.00133607	0.0241829	0.664897	0.134986	0.695071
TAP1	1.11892	0.524541	0.749128	1.64889	0.00323959	0.0225525	0.32826	0.00133607	0.0241829	0.664897	0.134986	0.695071
TNF	1.11892	0.524541	0.749128	1.64889	0.00323959	0.0225525	0.32826	0.00133607	0.0241829	0.664897	0.134986	0.695071
SMC3	0.718366	0.528162	0.749783	0.736949	0.560762	0.719853	1.5546	0.433366	0.769013	1.58032	0.41618	0.799268
ARL2	1.11813	0.551605	0.751705	0.92296	0.678955	0.823431	0.992976	0.977611	0.985781	0.946547	0.830569	0.965238
ARL6IP1	0.889587	0.540075	0.751705	1.16734	0.4008	0.587407	0.563608	0.0564949	0.2656	1.43018	0.104934	0.645791
ELTD1	1.17591	0.552358	0.751705	1.03652	0.897502	0.947217	0.638006	0.294828	0.642938	1.03625	0.922166	0.967606
FAM46C	0.858686	0.546543	0.751705	1.77422	0.0135294	0.0604646	0.484658	0.0831218	0.327066	0.775607	0.475673	0.851831
INTS12	0.747084	0.545135	0.751705	1.43908	0.407154	0.594313	0.905763	0.873987	0.964078	0.920741	0.894749	0.965238
OVOL1	1.11813	0.551605	0.751705	0.92296	0.678955	0.823431	0.992976	0.977611	0.985781	0.946547	0.830569	0.965238
PLCG2	1.21984	0.549582	0.751705	0.884399	0.725218	0.852367	1.22852	0.623087	0.867528	0.649073	0.410679	0.799268
RXRA	0.840111	0.540055	0.751705	1.17277	0.556849	0.719853	1.27427	0.469892	0.798596	0.757209	0.489964	0.851831
SETDB1	1.05956	0.5349	0.751705	1.19666	0.0514111	0.156393	0.629287	0.00120651	0.0241829	0.983572	0.894499	0.965238
SGK1	1.14354	0.545529	0.751705	0.861546	0.521696	0.698141	1.22746	0.460634	0.791145	0.798187	0.485582	0.851831
ZNF471	0.883976	0.544298	0.751705	1.0659	0.747729	0.873155	1.18421	0.495598	0.826122	0.920014	0.758822	0.965238
TRAF3	1.14555	0.559262	0.75825	0.995396	0.984547	0.99257	1.27686	0.395476	0.730421	0.534927	0.109251	0.645791
FLG	1.05856	0.563392	0.761	1.1969	0.0647753	0.187582	0.589279	0.000630386	0.0175538	1.03156	0.811125	0.965238
AGBL5	0.868437	0.603163	0.768048	1.26332	0.364748	0.568176	0.789496	0.532479	0.829395	1.04283	0.903516	0.965238
ARID2	1.13876	0.589056	0.768048	1.03876	0.876398	0.935282	0.656991	0.259781	0.598985	1.07002	0.830759	0.965238
CD1D	0.94256	0.583542	0.768048	1.22676	0.0506887	0.155503	0.67513	0.0139822	0.105449	1.08947	0.533991	0.907533
FGFBP1	0.837122	0.594621	0.768048	1.74751	0.067959	0.188823	0.416933	0.132287	0.420069	0.920574	0.851419	0.965238
FUBP1	1.16288	0.570812	0.768048	1.11068	0.69605	0.831585	0.492414	0.122252	0.406011	1.10582	0.772224	0.965238
LARP4B	0.91514	0.6068	0.768048	1.24883	0.179562	0.361119	0.665714	0.113245	0.386743	1.11575	0.613475	0.921486
MXRA5	0.893847	0.592396	0.768048	1.08838	0.678379	0.823431	1.36419	0.204422	0.545934	0.710539	0.265094	0.794849
NFE2L2	1.10088	0.59238	0.768048	0.66737	0.0394057	0.134558	1.77623	0.00400796	0.0453401	0.793592	0.374789	0.799268
OR4A16	0.853624	0.600591	0.768048	1.13912	0.653626	0.810317	1.32805	0.421198	0.762719	0.735619	0.479194	0.851831
PPM1F	0.897761	0.587	0.768048	1.03469	0.861205	0.929529	1.19184	0.468957	0.798596	0.938597	0.810244	0.965238
PPP2R1A	0.878577	0.602199	0.768048	1.28071	0.294772	0.498634	0.933767	0.83432	0.964078	0.849015	0.630798	0.926926
QKI	0.821703	0.587423	0.768048	1.92231	0.0464905	0.147628	0.154727	0.0342201	0.193558	1.10553	0.822811	0.965238
RAB40A	0.853624	0.600591	0.768048	1.23835	0.456561	0.648137	1.4986	0.233295	0.563098	0.46877	0.136976	0.695071
RAC1	0.91514	0.6068	0.768048	0.996093	0.981713	0.99257	1.48124	0.0462283	0.235699	0.722489	0.195849	0.76262
RASA1	1.30887	0.584218	0.768048	1.0458	0.929764	0.974359	1.16514	0.810176	0.95927	0.344893	0.279417	0.794849
RUNX1	0.873942	0.603009	0.768048	1.39348	0.173515	0.352849	0.515692	0.115332	0.390189	1.16463	0.632461	0.926926
UBC	0.865279	0.602933	0.768048	1.57339	0.0792676	0.211099	1.08775	0.808761	0.95927	0.392985	0.0618101	0.51026
ZNF483	0.857931	0.60169	0.768048	1.04097	0.88827	0.940216	0.553132	0.201519	0.545934	1.75884	0.073464	0.569804
CDKN1B	1.09538	0.618636	0.775696	1.01517	0.93539	0.974359	0.705978	0.204951	0.545934	1.12751	0.610461	0.921486
CPS1	1.16088	0.619727	0.775696	0.989436	0.97255	0.99257	0.951019	0.902678	0.966773	0.807797	0.625462	0.926926
GOT1	0.747239	0.621414	0.775696	1.43867	0.498694	0.686415	0.905827	0.897006	0.964078	0.920796	0.914011	0.967606
TMCO2	0.912491	0.620981	0.775696	1.2193	0.266299	0.465701	1.01033	0.965756	0.985781	0.800477	0.393226	0.799268
EPB41L3	1.10983	0.626935	0.777124	1.03752	0.865335	0.929529	1.38204	0.208662	0.54736	0.441853	0.0330894	0.502569
KEL	0.911071	0.627113	0.777124	1.0795	0.68344	0.823913	1.1635	0.521838	0.829395	0.868183	0.59001	0.913045
TMEM88	1.24652	0.628998	0.777124	1.03237	0.94588	0.975523	1.35993	0.581417	0.838357	0.290318	0.199476	0.76262
LASP1	0.92475	0.638095	0.783018	1.03012	0.856671	0.929529	0.872261	0.545981	0.829395	1.22352	0.321458	0.794849
NRAS	1.16882	0.635976	0.783018	1.64689	0.117492	0.277987	0.142459	0.0250113	0.17321	0.811909	0.663579	0.936634
DPRX	1.10854	0.645613	0.789567	1.13745	0.565388	0.723217	0.880486	0.683643	0.901759	0.725115	0.33908	0.794849
DDX5	1.06154	0.650108	0.789728	1.22821	0.112809	0.270444	0.578506	0.00912115	0.0798321	0.988174	0.946201	0.973082
PTEN	0.800579	0.648209	0.789728	1.03237	0.94588	0.975523	1.81472	0.242334	0.570938	0.613398	0.508181	0.871855
ARHGAP35	0.878876	0.670823	0.797562	1.50981	0.146563	0.315808	0.884332	0.763407	0.949667	0.612587	0.294685	0.794849
CD38	0.867162	0.671497	0.797562	1.65961	0.102981	0.255336	0.427959	0.145344	0.45194	0.946996	0.902113	0.965238
IFITM1	0.849025	0.668023	0.797562	0.74948	0.462491	0.651218	1.52453	0.321647	0.673041	1.27626	0.590053	0.913045
KIT	0.923308	0.660295	0.797562	1.04445	0.807919	0.90547	1.50652	0.0474953	0.238796	0.615094	0.0832785	0.602936
MBD1	0.840553	0.665313	0.797562	1.00905	0.981641	0.99257	0.86936	0.795031	0.95927	1.44327	0.421865	0.799555
RPL22	1.11329	0.671979	0.797562	0.936833	0.802624	0.90547	0.953318	0.889487	0.964078	0.96916	0.92746	0.970348
SOS1	0.891262	0.665194	0.797562	0.980727	0.941028	0.975523	0.988235	0.972636	0.985781	1.25316	0.48116	0.851831
GATA3	0.933396	0.690112	0.815914	1.5041	0.0124523	0.0570599	0.543088	0.0278695	0.173944	0.87725	0.579861	0.913045
SOX9	0.945444	0.691949	0.815914	1.27191	0.0781299	0.211067	0.630281	0.0324292	0.186339	1.06651	0.723293	0.965238
EEF1A1	1.11029	0.71861	0.840353	0.958346	0.886418	0.940216	0.864124	0.720136	0.927719	1.02814	0.942698	0.972242
PPM1D	0.954157	0.71964	0.840353	1.13872	0.310221	0.515137	0.727956	0.0943035	0.339456	1.1444	0.412062	0.799268
RAD51C	0.947059	0.715836	0.840353	1.13261	0.394337	0.586353	0.821204	0.344144	0.699889	1.06153	0.756114	0.965238
DNMT3A	0.91214	0.730577	0.850383	1.31427	0.283292	0.486027	0.775299	0.500847	0.826122	0.903558	0.778536	0.965238
SP8	0.942794	0.733722	0.851306	1.29063	0.125459	0.285636	1.07125	0.755116	0.942593	0.600802	0.0597433	0.51026
CLEC4E	1.0544	0.741086	0.854373	1.08215	0.622349	0.779552	0.71126	0.153094	0.461341	1.07587	0.725835	0.965238
MAP4K3	1.08722	0.740409	0.854373	0.855647	0.553578	0.719853	0.936762	0.849206	0.964078	1.18557	0.593676	0.913045
ZFHX3	1.10801	0.745619	0.85687	1.13676	0.685077	0.823913	1.2438	0.578031	0.836989	0.413183	0.127753	0.694151
CTCF	0.899427	0.753941	0.858259	1.57177	0.152334	0.322485	0.959079	0.924987	0.981951	0.446853	0.168629	0.735467
PHF6	1.07357	0.753826	0.858259	0.752431	0.23823	0.433806	1.91198	0.00817648	0.0748143	0.571683	0.128476	0.694151
TCF7L2	1.12177	0.753319	0.858259	0.871023	0.717565	0.848162	1.25546	0.615446	0.860198	0.788759	0.656843	0.936634
EZR	0.896679	0.756518	0.858378	1.63292	0.13417	0.297973	0.150411	0.0308167	0.179942	1.29069	0.54315	0.913045
IRF4	1.05461	0.758787	0.858378	1.53042	0.0105066	0.0513973	0.350487	0.0014895	0.024509	0.868312	0.559779	0.913045
TRIM23	0.849257	0.761897	0.859211	1.91943	0.184914	0.369828	0.776235	0.737089	0.929709	0.367927	0.313253	0.794849
ALK	0.93393	0.781033	0.875114	0.958242	0.862306	0.929529	1.14101	0.666611	0.900423	1.05291	0.870522	0.965238
MORC4	1.07513	0.782622	0.875114	0.826828	0.489275	0.676022	1.85992	0.0302129	0.179942	0.4745	0.102402	0.645791
UPP1	1.057	0.783251	0.875114	0.668102	0.0658091	0.187582	1.56234	0.0537922	0.256221	1.03261	0.90391	0.965238
ASXL2	0.933971	0.789826	0.87761	1.1605	0.550295	0.719853	0.814212	0.565913	0.829395	1.0483	0.88639	0.965238
JTB	0.97352	0.790334	0.87761	1.28008	0.0116232	0.0553629	0.535389	0.000114146	0.0051651	1.12331	0.364879	0.799268
NCOR1	0.933991	0.794374	0.879398	1.17031	0.536551	0.710169	1.20967	0.551935	0.829395	0.653872	0.285598	0.794849
EPS8	1.04569	0.79798	0.880697	1.17457	0.350639	0.551876	0.576847	0.0487521	0.241757	1.09759	0.679352	0.94952
HSP90AB1	1.03745	0.805847	0.88399	1.29621	0.0753049	0.204965	0.887906	0.563472	0.829395	0.611959	0.0368186	0.502569
MTOR	0.934032	0.803805	0.88399	1.46985	0.138323	0.304163	0.602331	0.234883	0.563098	0.849226	0.667546	0.936634
TSC1	1.06835	0.814085	0.890329	0.93228	0.807752	0.90547	1.36167	0.359675	0.707621	0.675226	0.361958	0.798955
EP300	0.934113	0.824271	0.898753	1.49434	0.165837	0.341097	0.492764	0.167177	0.484145	0.94309	0.88635	0.965238
EIF1AX	0.951006	0.829429	0.901662	0.778193	0.301058	0.50455	1.40485	0.21178	0.547602	1.1223	0.695143	0.95987
CARD11	0.969179	0.851849	0.920506	1.05165	0.761951	0.883249	1.19817	0.382096	0.724181	0.780693	0.302495	0.794849
TDRD10	0.98105	0.850747	0.920506	1.26954	0.0156697	0.0688477	0.561328	0.000328979	0.011909	1.09221	0.499172	0.860478
CUL4B	0.954884	0.85758	0.922864	0.637123	0.105647	0.260165	1.96885	0.0125014	0.100567	0.952329	0.886965	0.965238
NUP210L	0.982429	0.85913	0.922864	1.24956	0.0219301	0.0888752	0.537601	0.000106545	0.0051651	1.1506	0.266406	0.794849
ATP1B4	0.95587	0.863765	0.925098	0.624129	0.0995005	0.248408	2.09532	0.00663785	0.0686543	0.887311	0.739878	0.965238
CC2D1B	1.04341	0.868028	0.926921	0.936833	0.802624	0.90547	0.842504	0.633107	0.873315	1.20728	0.555453	0.913045
ARMCX1	0.962558	0.898561	0.94299	1.07883	0.797288	0.90547	1.53722	0.20604	0.545934	0.479021	0.149432	0.721259
DNAH12	0.934316	0.892009	0.94299	1.91971	0.159618	0.330409	0.319281	0.241955	0.570938	0.690248	0.619419	0.922755
PIK3R1	0.934336	0.901384	0.94299	1.67897	0.311823	0.515434	0.836044	0.813525	0.95927	0.394255	0.351589	0.794849
TBC1D12	0.934336	0.901384	0.94299	0.696762	0.534161	0.710169	1.97933	0.233822	0.563098	0.84986	0.830359	0.965238
TET2	0.934316	0.892009	0.94299	0.958489	0.932493	0.974359	1.08733	0.894775	0.964078	1.10531	0.874306	0.965238
TMEM92	1.01975	0.903916	0.94299	1.13136	0.441176	0.636278	0.720929	0.170527	0.486069	1.04409	0.838593	0.965238
U2AF1	0.962558	0.898561	0.94299	1.27983	0.392942	0.586353	0.740166	0.488693	0.822822	0.898997	0.794335	0.965238
ZNF750	0.981779	0.900599	0.94299	1.29606	0.0686397	0.188823	0.537535	0.00926229	0.0798321	1.0753	0.701855	0.95987
GNA13	1.01419	0.918712	0.955671	1.27721	0.0688526	0.188823	0.580324	0.0128474	0.101103	0.994439	0.975741	0.983895
BCLAF1	1.02279	0.922622	0.956989	0.839599	0.467455	0.653354	1.02434	0.936888	0.983053	1.23954	0.453671	0.83365
CEP76	0.985275	0.948695	0.957789	1.12253	0.610747	0.767674	1.3837	0.232365	0.563098	0.499873	0.0739801	0.569804
DNER	1.02797	0.941512	0.957789	1.58135	0.201112	0.397828	0.581538	0.366977	0.718084	0.591156	0.382007	0.799268
DUSP19	0.985275	0.948695	0.957789	1.06569	0.780917	0.900293	1.08799	0.774313	0.953406	0.831307	0.568871	0.913045
FBXW7	1.01949	0.947621	0.957789	1.04597	0.878441	0.935282	1.01136	0.976657	0.985781	0.878455	0.750593	0.965238
FRMD7	1.01581	0.949852	0.957789	0.859793	0.557218	0.719853	1.71966	0.0497106	0.243179	0.602405	0.199418	0.76262
HRAS	1.02797	0.941512	0.957789	0.665997	0.319471	0.523296	1.58826	0.278345	0.612047	1.0628	0.900905	0.965238
HSPA6	0.993081	0.944842	0.957789	1.27784	0.0119804	0.0563235	0.604319	0.00116171	0.0241829	1.00622	0.962632	0.979002
KLHL8	0.971701	0.933234	0.957789	0.996897	0.992764	0.993354	1.45202	0.347144	0.702045	0.649073	0.410679	0.799268
MYB	0.981777	0.934249	0.957789	1.00738	0.973692	0.99257	0.834906	0.56183	0.829395	1.19688	0.516273	0.881561
SLC4A5	1.025	0.934977	0.957789	0.63769	0.174475	0.352849	1.25599	0.538067	0.829395	1.45725	0.28819	0.794849
MAP3K1	0.983567	0.966226	0.971594	1.17217	0.67829	0.823431	1.41975	0.443163	0.778762	0.408469	0.207023	0.770728
STAG2	1.00369	0.987306	0.990041	0.689296	0.133941	0.297973	1.97518	0.00559335	0.0613573	0.755203	0.405269	0.799268
PCBP1	1.00283	0.991502	0.991502	0.826828	0.489275	0.676022	1.70595	0.0690225	0.30067	0.689163	0.351619	0.794849
Abbreviation: FDR, false discovery rate; OR, odds ratio.
* Red highlight indicates P or FDR < 0.05
